1                   Climate change will drive novel cross-species  
2                   viral transmission

3           Colin J. Carlson<sup>1,2,†</sup>, Gregory F. Albery<sup>1,3,†</sup>, Cory Merow<sup>4</sup>, Christopher H.  
4           Trisos<sup>5</sup>, Casey M. Zipfel<sup>1</sup>, Evan A. Eskew<sup>3</sup>, Kevin J. Olival<sup>3</sup>, Noam Ross<sup>3</sup>, and  
5           Shweta Bansal<sup>1</sup>

6                   <sup>1</sup>*Department of Biology, Georgetown University, Washington, D.C., USA.*

7           <sup>2</sup>*Center for Global Health Science & Security, Georgetown University, Washington, D.C., USA.*

8                   <sup>3</sup>*EcoHealth Alliance, New York, NY, USA.*

9                   <sup>4</sup>*Ecology and Evolutionary Biology, University of Connecticut, Storrs, CT, USA.*

10           <sup>5</sup>*African Climate and Development Initiative, University of Cape Town, Cape Town, South  
11                   Africa.*

12                   <sup>†</sup>*These authors share equal authorship.*

13                   January 24, 2020

14

## Abstract

15

16

17

18

19

20

21

22

23

24

25

26

27

28

29

30

31

32

33

34

35

36

37

Between 10,000 and 600,000 species of mammal virus are estimated to have the potential to spread in human populations, but the vast majority are currently circulating in wildlife, largely undescribed and undetected by disease outbreak surveillance<sup>1,2,3</sup>. In addition, changing climate and land use drive geographic range shifts in wildlife, producing novel species assemblages and opportunities for viral sharing between previously isolated species<sup>4,5</sup>. In some cases, this will inevitably facilitate spillover into humans<sup>6,7</sup>—a possible mechanistic link between global environmental change and emerging zoonotic disease<sup>8</sup>. Here, we map potential hotspots of viral sharing, using a phylogeographic model of the mammal-virus network, and projections of geographic range shifts for 3,870 mammal species under climate change and land use scenarios for the year 2070. Shifting mammal species are predicted to aggregate at high elevations, in biodiversity hotspots, and in areas of high human population density in Asia and Africa, sharing novel viruses between 3,000 and 13,000 times. Counter to expectations, holding warming under 2°C within the century does not reduce new viral sharing, due to greater range expansions—highlighting the need to invest in surveillance even in a low-warming future. Most projected viral sharing is driven by diverse hyperreservoirs (rodents and bats) and large-bodied predators (carnivores). Because of their unique dispersal capacity, bats account for the majority of novel viral sharing, and are likely to share viruses along evolutionary pathways that could facilitate future emergence in humans. Our findings highlight the urgent need to pair viral surveillance and discovery efforts with biodiversity surveys tracking range shifts, especially in tropical countries that harbor the most emerging zoonoses.

## 38 Main Text

39 In the face of rapid environmental change, survival for many species depends on moving  
40 to track shifting climates. Even in a best case scenario, many species are projected  
41 to shift a hundred kilometers or more in the next century<sup>9,10</sup>. In the process, many  
42 animals will bring their parasites and pathogens into new environments<sup>4,11</sup>, creating new  
43 evolutionary opportunities for host jumps<sup>8</sup>. Most conceptual frameworks for cross-species  
44 transmission revolve around how these host jumps facilitate the spillover of new zoonotic  
45 pathogens into humans<sup>12,13,14</sup>, but viral evolution is an undirected process<sup>15</sup>, in which  
46 humans are only one of over 5,000 mammal species with over 12 million possible pairwise  
47 combinations<sup>16</sup>. Despite their indisputable significance, zoonotic emergence events are  
48 just the tip of the iceberg; almost all cross-species transmission events will occur among  
49 wild mammals, largely undetected and mostly inconsequential for public health.

50 Of the millions of possible pairwise viral exchanges, the vast majority are biologically  
51 implausible, as host species' geographic ranges currently do not overlap. However, as  
52 ranges shift, a small fraction of possible interactions will occur, of which a subset will  
53 lead to viral establishment in a novel host. Which subset results in establishment de-  
54 pends on *opportunity* and *compatibility*<sup>14,17,18</sup>, analogous to exposure and susceptibility  
55 within populations, and both dimensions pose an important predictive challenge. The  
56 ability of species to track shifting habitats in a changing climate will determine which  
57 pairs of species encounter each other for the first time<sup>4,19</sup>. Habitat selection and be-  
58 havioral differences can further limit contact, even if species are nominally sympatric<sup>19</sup>.  
59 Some viruses may spread environmentally between spatially-proximate species with no  
60 direct behavioral contact<sup>20</sup>, but generally, sharing is more likely among species with more  
61 ecological overlap<sup>21</sup>. Even among species in close contact, most spillovers are still a dead  
62 end; progressively smaller subsets of viruses can infect novel host cells, proliferate, and  
63 transmit onward in a new host<sup>18</sup>. Their ability to do so is determined by compatibility  
64 between viral structures, host cell receptors, and host immunity<sup>6</sup>. Because closely related  
65 species share both ecological and immunological traits through identity by descent, phy-  
66 logeny is a strong predictor of pathogen sharing<sup>17,22</sup>, as well as susceptibility to invasion  
67 by new viruses<sup>23,24,25</sup>. In a changing world, these factors should continue to mediate the  
68 impact of ecosystem turnover on the mammalian virome.

69 Although several studies have mapped current hotspots of emerging diseases<sup>3,26,27</sup>,  
70 few have modeled them in the context of global change. With the global reassortment  
71 of animal biodiversity, it is unknown whether bats and rodents will still play a central  
72 role in viral emergence<sup>3,28</sup> (ED Figure 1), or whether hotspots of viral emergence will  
73 stay in tropical rainforests<sup>27,29</sup> which currently harbor most undiscovered viruses<sup>3,30</sup>.  
74 Here, by projecting geographic range shifts and applying fundamental biological rules

75 for cross-species transmission, we predicted how and where global change could create  
76 novel opportunities for viral sharing. We built species distribution models for 3,870  
77 mammal species, and projected geographic range shifts based on four paired scenarios  
78 of climate change (representative concentration pathways, RCPs) and land use change  
79 (shared socioeconomic pathways, SSPs) by 2070. We treated dispersal potential as an  
80 additional layer of biological realism, inferring these limits for species based on allomet-  
81 ric scaling<sup>31</sup>, and compared predictions with and without dispersal constraints. We used  
82 these projections to identify where novel range overlap among unfamiliar species (“first  
83 encounters”) could happen, and used a recently-developed model to predict the proba-  
84 bility of viral sharing based on geographic overlap and host phylogenetic similarity<sup>17</sup>.  
85 (ED Figure 2) This model framework allows powerful inference based on the ~1% of  
86 the global mammalian virome that has been described<sup>1,3,17</sup>. Using this approach, we  
87 tested the hypothesis that environmental change should drive biotic homogenization of  
88 mammal communities, exposing mammals to novel viruses, and altering the structure of  
89 mammal-virus interactions.

90 Most mammals are projected to undergo rapid range shifts in the next half century<sup>10</sup>.  
91 If range shifts can keep pace with the velocity of climate change<sup>32</sup>, we predict that the  
92 vast majority of mammal species (89%–98%) will overlap with at least one unfamiliar  
93 species somewhere in their future range, regardless of emissions scenario. At the global  
94 level, community turnover would permit almost 300,000 novel species interactions (ED  
95 Figure 3). These “first encounters” between mammal species will occur everywhere in the  
96 world, but are concentrated in tropical Africa and southeast Asia (ED Figure 4). This  
97 result was surprising, and counter to our expectation that species might aggregate at  
98 higher latitudes, given that most research has focused on poleward range shifts<sup>33,34,35</sup>,  
99 and previous work has anticipated a link between climate change, range shifts, and  
100 parasite host-switching in the Arctic<sup>36,37</sup>. However, our findings show that communities  
101 tend to shift along latitudinal gradients together, with species rarely encountering new  
102 conspecifics<sup>38</sup>. In contrast, species will track thermal optima along elevational gradients  
103 and aggregate in novel combinations in mountain ranges, especially in tropical areas with  
104 the highest baseline diversity, matching prior predictions<sup>39</sup>.

105 This global re-organization of mammal assemblages is projected to dramatically im-  
106 pact the structure of the mammalian virome. Accounting for geographic opportunity  
107 and phylogenetic compatibility, we projected that a total of 279,427 first encounters in  
108 RCP 2.6 would lead to nearly 12,000 novel sharing events. Assuming that spillover will  
109 be localized to areas of novel host overlap, we mapped expected viral sharing events, and  
110 found again that most sharing should occur in high-elevation, species-rich ecosystems  
111 in Africa and Asia (Figure 1A). If species survive a changing climate by aggregating in  
112 high elevation refugia, this suggests emerging viruses may be an increasing problem for

113 their conservation<sup>40,41</sup>. Across scenarios, the spatial signal of expected sharing events is  
114 nearly identical, and dominated more by the extent of range shifts than by underlying  
115 community phylogenetic structure (ED Figure 5); at least in our framework, opportunity  
116 drives spatial patterns more than compatibility.

117 Species' dispersal capacity is likely to constrain range shifts, and therefore to limit  
118 novel viral exchange. We limited the dispersal potential of flightless species further to the  
119 restrictions placed on the SDM projections, based on an established allometric scaling  
120 with body size, trophic rank, and generation time<sup>42</sup>. Dispersal limits caused significant  
121 reductions in range expansions across all scenarios, especially warmer ones, and therefore  
122 drove a reduction in novel interactions. Even in RCP 2.6 (the mildest scenario), limiting  
123 dispersal reduced the number of first encounters by 60%, and reduced the associated viral  
124 sharing events by 69%—to a still-staggering 3,600–3,800 projected viral sharing events.  
125 Because trophic position and body size determine dispersal capacity, carnivores account  
126 for a disproportionate number of first encounters, while ungulates and rodents have  
127 slightly fewer first encounters than expected at random (ED Figure 6) Spatial patterns  
128 also changed dramatically when dispersal constraints were added, with the majority of  
129 first encounters and cross-species viral transmission events occurring in southeast Asia  
130 (Figure 1B, ED Figures 4, 5). This viral sharing hotspot is driven disproportionately  
131 by bats, because their dispersal was left unconstrained; we made this choice given their  
132 exclusion from the original study<sup>31</sup>, genetic evidence that flight allows bats—and their  
133 viruses—to circulate at continental levels<sup>43,44</sup>, and data suggesting that bat distributions  
134 are already undergoing disproportionately rapid shifts<sup>45</sup>. Bats account for 87% of first  
135 encounters after constraining dispersal, and dominate the spatial pattern, with most of  
136 their first encounters restricted to southeast Asia (Figure 2).

137 Bats' unique capacity for flight could be an important and previously unconsidered  
138 link between climate-driven range shifts and future changes in the mammal virome.  
139 Even non-migratory bats can regularly travel hundreds of kilometers within a lifetime,  
140 far exceeding what small mammals might be able to cover in 50 years; half of all bat  
141 population genetic studies have failed to find any evidence for isolation by distance<sup>46</sup>.  
142 This unique dispersal capacity has inevitable epidemiological implications, with recent  
143 evidence suggesting that continental panmixia may be common for zoonotic reservoirs,  
144 and allow viral circulation at comparable scales<sup>43,44,47</sup>. We found that a staggering  
145 number of studies have also identified ongoing rapid range expansions in bat species  
146 around the world<sup>45,48,49,50,51,52,53,54,55</sup>, with little mention in the broader climate change  
147 or emerging disease literature. If flight does allow bats to undergo more rapid range  
148 shifts than other mammals, we expect they should drive the majority of novel cross-  
149 species viral transmission, and likely bring zoonotic viruses into new regions. This could  
150 add an important new dimension to ongoing debate about whether bats are “special”

151 due to their higher viral richness, higher proportion of zoonotic viruses, and potentially  
152 unique immune adaptations<sup>3,56,57,58,59</sup>.

153 More broadly, climate-driven changes in the mammalian virome are likely to cascade  
154 in future emergence of zoonotic viruses. Among the tens of thousands of expected viral  
155 host jumps, some of the highest-risk zoonoses or potential zoonoses are likely to find  
156 new hosts. This may pose a threat to human health down the road: the same general  
157 rules for cross-species transmission explain spillover patterns for emerging zoonoses<sup>60,61</sup>,  
158 and the viral species that make successful jumps across wildlife species have the highest  
159 propensity for zoonotic emergence<sup>3,7,28</sup>. Just as simian immunodeficiency virus emer-  
160 gence in chimpanzees and gorillas facilitated the origin of HIV, or SARS-CoV spillover  
161 into civets allowed a bat virus to reach humans, these wildlife-to-wildlife host jumps may  
162 be evolutionary stepping stones for the ~10,000 to 600,000 potentially zoonotic viruses  
163 that are currently circulating in mammal hosts<sup>1</sup>.

164 To illustrate this problem, we constructed a sub-network of 13 possible Zaire ebolavirus  
165 hosts in Africa, and projected possible first encounters involving these species (Figure  
166 3A-C). We project these 13 species to encounter 3,604 new mammals in RCP 2.6, with  
167 a modest reduction to 2,586 species by dispersal limits. These first encounters are pre-  
168 dicted to produce 87 new viral sharing events that might include ZEBOV, and which  
169 cover a much broader part of Africa than the current zoonotic niche of Ebola<sup>62</sup>. Hu-  
170 man spillover risk aside, this could expose several new wildlife species to a deadly virus,  
171 historically responsible for sizable primate die-offs<sup>63</sup>. Moreover, for zoonoses like Zaire  
172 ebolavirus without known reservoirs, future host jumps would only complicate urgent  
173 efforts to trace the source of spillover and anticipate future emergences<sup>64,65</sup>. Ebola is  
174 far from unique: with 5,762–11,122 first encounters between bats and primates alone  
175 leading to an expected 57–181 new viral sharing events across scenarios (Figure 3D),  
176 many potential zoonoses are likely to experience new evolutionary opportunities because  
177 of climate change.

178 Future hotspots of novel assemblages and viral evolution are projected to coincide  
179 areas of high human population density, further increasing vulnerability to potential  
180 zoonoses. First encounters are disproportionately likely to occur in areas that are pro-  
181 jected to be either human settled or used as cropland, and surprisingly less likely to  
182 occur in forests, which current literature highlights as producing most emerging diseases  
183 (Figure 4)<sup>27</sup>. This finding is consistent for bats and non-bats, and may be an accident  
184 of geography, but more likely represents the tendency of human settlements to aggre-  
185 gate on continental edges and around biodiversity hotspots<sup>66</sup>. Regardless of mechanism,  
186 we predict that tropical hotspots of novel viral sharing will broadly coincide with high  
187 population density areas in 2070, especially in the Sahel, the Ethiopian highlands and  
188 the Rift Valley, India, eastern China, Indonesia, and the Philippines (Figure 4). Some

189 European population centers also land in these hotspots; recent emergences in this re-  
190 gion like Usutu virus<sup>67</sup> highlight that these populations can still be vulnerable, despite  
191 greater surveillance and healthcare access. If range-shifting mammals create ecological  
192 release for undiscovered zoonoses, populations in these areas are likely to be the most  
193 vulnerable.

194 Whereas most studies agree that climate change mitigation through reducing green-  
195 house gas emissions will prevent extinctions and minimize harmful ecosystem impacts,  
196 our results suggest that mitigation cannot reduce the likelihood of climate-driven viral  
197 sharing. Instead, the mildest, slowest scenarios for biotic homogenization appear likely  
198 to produce the most cross-species viral transmission: when climate velocity is lowest,  
199 species can successfully track shifting climate optima, leading to more range expansion,  
200 and more first encounters. Accounting for dispersal limits, species gained an average  
201 of 75% range in the mildest pathway (RCP 2.6); in comparison, only 28% of species  
202 experienced a net expansion in the most extreme pathway (RCP 8.5), for an average of  
203 21% range gain. (ED Figure 3A) In fact, in the warmest scenario, up to 326 species lost  
204 their entire range, with 168 attributable to dispersal limits alone. As a result, there were  
205 5% fewer first encounters in RCP 8.5 compared to RCP 2.6, and unexpectedly, a 2%  
206 reduction in the connectivity of the future global sharing network. (ED Figure 3B,D)  
207 Overall, our results indicate that a mild perturbation of the climate system could create  
208 thousands of new eco-evolutionary opportunities for viruses. We caution that this does  
209 not imply a possible upside to catastrophic warming, which will be accompanied by mass  
210 defaunation, devastating disease emergence, and unprecedented levels of human displace-  
211 ment and global instability. Rather, our results highlight the urgency of better wildlife  
212 surveillance systems and health infrastructure as a form of climate change adaptation,  
213 even if mitigation efforts are successful and global temperatures stay under +2°C.

214 Our study establishes a macroecological link between climate change and cross-species  
215 viral transmission. In practice, the patterns we describe are likely to be complicated by  
216 several ecological factors, including the temperature sensitivity of viral host jumps<sup>68</sup>;  
217 the possibility that defaunation especially at low elevations might interact with disease  
218 prevalence through biodiversity dilution and amplification effects, not captured by our  
219 models<sup>69</sup>; or temporal heterogeneity in exposure (hosts might exchange viruses in passing  
220 but not overlap by 2070, especially in warmer scenarios). Future work can also expand  
221 the scope of our findings to other host-parasite systems; our novel approach, which  
222 combines viral sharing models with massive species distribution modeling pipelines, is  
223 readily applied to other datasets. Birds have the best documented virome after mammals,  
224 and changing migration targets in a warming world may be especially important targets  
225 for prediction. With amphibians facing disproportionately high extinction rates due  
226 to a global fungal panzootic, and emerging threats like ranavirus causing conservation

227 concern, viral exchange among amphibians may be especially important information for  
228 conservation practitioners<sup>70</sup>. Finally, marine mammals are an important target given  
229 their exclusion here, especially after a recent study implicating reduced Arctic sea ice in  
230 viral sharing among sympatric pinnipeds and sea otters—a result that may be the first  
231 proof of concept for our proposed climate-disease link<sup>71</sup>.

232 Because hotspots of cross-species transmission are predictable, our study provides  
233 the first template for how surveillance could target *future* hotspots of viral emergence in  
234 wildlife. In the next decade alone, over a billion dollars could be spent on a proposed  
235 global effort to identify zoonotic threats before they spread from wildlife reservoirs into  
236 human populations<sup>2</sup>. These efforts are being undertaken during the greatest period  
237 of global ecological change recorded in human history, and in a practical sense, the  
238 rapid movement of species and formation of no-analog communities poses an unexpected  
239 challenge for virological research. While several studies have addressed how range shifts  
240 in zoonotic reservoirs might expose humans to novel viruses, few have considered the fact  
241 that most new exposures will be among mammal species. Tracking spillover into humans  
242 is paramount, but so is tracking of viral sharing in wildlife, and targeting surveillance in  
243 hotspots of future sharing may help researchers identify host jumps early on.



## 244 **Methods**

245 In this study, we develop global maps for terrestrial mammals that model their eco-  
246 logical niche as a function of climate and habitat use. We project these into paired  
247 climate-land use futures for 2070, with dispersal limitations set by biological constraints  
248 for each species. We predict the probability of viral sharing among species pairs us-  
249 ing a model of the mammalian viral sharing network that is trained on phylogenetic  
250 relatedness and current geographic range overlaps. With that model, we map the pro-  
251 jected hotspots of new viral sharing in different futures. All analysis code is available at  
252 [github.com/cjcarlson/iceberg](https://github.com/cjcarlson/iceberg).

### 253 **Mapping species distributions**

254 We developed species distribution models for a total of 3,870 species in this study, divided  
255 into two modeling pipelines based on data availability (ED Figures 8, 9).

### 256 **Data Collection**

257 We scraped the Global Biodiversity Informatics Facility (GBIF) for mammal occurrence  
258 records, and developed species distribution models for all 3,870 species with at least 3  
259 unique terrestrial presence records on a 25 km by 25 km grid (one unique point per grid  
260 cell). This grain was chosen based on the availability of future land use projections (see  
261 below). Spatial and environmental outliers were removed based on Grubb outlier tests  
262 (p-value of  $1e-3$ )<sup>72</sup>.

### 263 **Poisson point process models**

264 For 3,088 species with at least 10 unique presence records, Poisson point process models  
265 (closely related to Maxent) were fit using regularized downweighted Poisson regression<sup>73</sup>  
266 with 20,000 background points fit with the R package `glmnet`<sup>74,75,74</sup>. The spatial do-  
267 main of predictions was chosen based on the continent(s) where a species occurred in  
268 their IUCN range map. We trained species distribution models on current climate data  
269 using the WorldClim 2 data set<sup>76</sup>, using mean annual temperature, mean diurnal temper-  
270 ature range, annual precipitation, precipitation seasonality, and precipitation in warmest  
271 quarter/ (precipitation in warmest quarter + precipitation in coldest quarter). These  
272 predictors were chosen based on having global correlations  $<0.7$  among one another.  
273 These candidate predictors were further filtered on a species-by-species basis, retaining  
274 the maximum number of predictors with correlation  $<0.7$  within the domain where the  
275 model was fit.

276 Models were fit with 5-fold cross validation, where folds were assigned based on spa-  
277 tial clusters to remove the influence of spatial autocorrelation on cross-validation perfor-  
278 mance statistics. Linear (all species), quadratic (species with >100 records), and product  
279 (species with >200 records) features were used. The regularization parameter was de-  
280 termined based on 5-fold cross-validation with each fold, choosing a value 1 standard  
281 deviation below the minimum deviance<sup>77</sup>. This resulted in five models per species which  
282 were then combined in an unweighted ensemble. Continuous predictions of the ensemble  
283 were converted to binary presence/absence predictions by choosing a threshold based on  
284 the 5th percentile of the ensemble predictions at training presence locations.

285 When models were projected into the future, we limited extrapolation to 1 standard  
286 deviation beyond the data range of presence locations for each predictor. This decision  
287 balances a small amount of extrapolation based on patterns in a species niche with  
288 limiting the influence of monotonically increasing marginal responses, which can lead to  
289 statistically unsupported (and likely biologically unrealistic) responses to climate.

## 290 **Range bagging models**

291 For an additional 783 rare species (3 to 9 unique points on the 25 km grid), we produced  
292 species distribution models with a simpler range bagging algorithm, a stochastic hull-  
293 based method that can estimate climate niches from an ensemble of underfit models<sup>78,79</sup>,  
294 and is therefore well suited for smaller datasets. From the full collection of presence  
295 observations and environmental variables range-bagging proceeds by randomly sampling  
296 a subset of presences (proportion  $p$ ) and a subset of environmental variables ( $d$ ). From  
297 these, a convex hull around the subset of points is generated in environmental space. The  
298 hull is then projected onto the landscape with a location considered part of the species  
299 range if its environmental conditions fall within the estimate hull. The subsampling is  
300 replicated  $N$  times, generating  $N$  ‘votes’ for each cell on the landscape. One can then  
301 choose a threshold for the number of votes required to consider the cell as part of the  
302 species’ range to generate the binary map used in our downstream analyses. Based on  
303 general guidelines in<sup>78</sup> we chose  $p = 0.33$ ,  $d = 2$ , and  $N = 100$ . We then chose the voting  
304 threshold to be 0.165 ( $=0.33/2$ ) because this implies that the cell is part of the range  
305 at least half the time for each subsample. Upon visual inspection, this generally lead to  
306 predictions that were very conservative about inferring that unsampled locations were  
307 part of a species distribution. The same environmental predictors and ecoregion-based  
308 domain selection rules were used for range bagging models as were used for the point  
309 process models discussed above. This hull-based approach is particularly valuable for  
310 poorly sampled species which may suffer from sampling bias because bias within niche  
311 limits has little effect on range estimates.

## 312 **Model validation**

313 PPM models performed well, with a mean test AUC under 5 fold cross-validation (using  
314 spatial clustering to reduce inflation) of 0.77 (s.d. 0.13). The mean partial AUC eval-  
315 uated over a range of sensitivity relevant for SDM (0.8-0.95) was 0.8 (s.d. 0.08). The  
316 mean sensitivity of binary maps used to assess range overlap (based on the 5% training  
317 threshold used to make a binary map) was 0.89 (s.d. 0.08). Range bagging models were  
318 difficult to meaningfully evaluate because they were based on extremely small sample  
319 sizes (3-9). The mean training AUC (we did not perform cross-validation due to small  
320 sample size) was 0.96 (s.d. 0.09). The binary maps had perfect sensitivity (1) because  
321 the threshold used to make them was chosen sufficiently low to include the handful of  
322 known presences for each species. One way to assess how much we inferred the range  
323 for these species is to quantify how much of the range was estimated based on out mod-  
324 els, based on the number of (10km) cells predicted to be part of the species range even  
325 when it was not observed there. The mean number of cells inferred to contain a presence  
326 was 253 (s.d. 448); however, the distribution is highly right skewed with a median of  
327 94. This indicates that the range bagging models were typically relatively conservative  
328 about inferring ranges for poorly sampled species.

## 329 **Habitat range and land use**

330 We used the Land Use Harmonization version 2.0 (LUH2) gridded dataset to capture  
331 global patterns in land cover for the present and future<sup>80</sup>. These data are derived from  
332 an integrative assessment model that pairs land use scenarios with representative con-  
333 centration pathways. For the current models, we used historical land-use maps (LUH2  
334 v2h), which are intended for use over the period 850 to 2015 C.E.<sup>81</sup>. To capture species'  
335 habitat preference, we collated data for all 3,870 mammal species from the IUCN Habitat  
336 Classification Scheme version 3.1. We then mapped 104 unique IUCN habitat classifi-  
337 cations onto the eight land use types present in the LUH dataset. For 962 species, no  
338 habitat data was available, or no correspondence existed between a land type in the IUCN  
339 scheme and our land use data; for these species, land use filters were not used. Filtering  
340 based on habitat was done conservatively: species were allowed in current and future  
341 ranges to exist in a pixel if any non-zero percent was assigned a suitable habitat type;  
342 almost all pixels contain multiple habitats. In some scenarios, human settlements cover  
343 at least some of a pixel for most of the world, allowing synanthropic species to persist  
344 throughout most of their climatically-suitable range. For those with habitat data, the  
345 average reduction in range from habitat filtering was 7.6% of pixels.

## 346 Refining the dataset

347 Of the 3,870 species for which we generated distribution models, 103 were aquatic mam-  
348 mals (cetaceans, sirenians, pinnipeds, and sea otters), and 382 were not present in the  
349 mammalian supertree that we used for phylogenetic data<sup>82</sup>. These species were ex-  
350 cluded. Aquatic species were removed using a two-filter approach, by cross-referencing  
351 with Pantheria<sup>83</sup>. These results were verified by checking no species only had marine  
352 habitat use types (see ‘Habitat range and land use’). We also excluded 246 monotremes  
353 and marsupials because the shape of the supertree prevented us from fitting satisfactory  
354 GAMM smooths to the phylogeny effect, leaving 3,139 non-marine Eutherian mammals  
355 with associated phylogenetic data.

## 356 Predicting future species distributions

357 We modeled a total of 16 possible futures, produced by four paired climate-land use  
358 change pathways and two optional filters on species ranges (habitat preferences and dis-  
359 persal limits). The full matrix of possible scenarios captures a combination of scenario  
360 uncertainty about global change and epistemological uncertainty about how best to pre-  
361 dict species’ range shifts. By filtering possible future distributions based on climate, land  
362 use, and dispersal constraints, we aimed to maximize realism; our predictions were con-  
363 gruent with extensive prior literature on climate- and land use-driven range loss<sup>84,85,86</sup>.

## 364 Climate and land use futures

365 Species distribution models were projected for 2070 using climate models, and then spa-  
366 tially filtered by land use projections. Climate and land-use future pathways are coupled  
367 by the Land Use Harmonization 2.0 integrative assessment model<sup>87,81</sup>, such that every  
368 future has a representative concentration pathway (RCP) for climate and a shared so-  
369 cioeconomic pathway (SSP) for land use. For climate we used the HadGEM2 Earth  
370 System Model projections for 2070, with the four standard RCPs: 2.6, 4.5, 6.0, and 8.5  
371 (where the values represent added  $W/m^2$  of solar radiation by the end of the century  
372 due to greenhouse gas emissions). These were respectively paired with SSP 1 (“Sustain-  
373 ability”); SSP 2 (“Middle of the Road”); SSP 4 (“Inequality”); and SSP 5 (“Fossil-Fueled  
374 Development”).

375 These pairings can be thought of as a gradient of scenarios of global change with differ-  
376 ent levels of severity and sustainability. Not all scenarios are possible; the four we selected  
377 are drawn as some of the most representative from an underlying “scenario matrix” that  
378 includes every possible parameterization, some of which are entirely incompatible<sup>88</sup>. (For  
379 example, in the vast majority of integrative assessment models, decarbonization cannot

380 be achieved fast enough in the SSP 5 scenario to achieve RCP 2.6.) As pairs, SSP-RCP  
381 narratives can be merged to create overall narratives about how global change could look.  
382 For example, in SSP 1-RCP 2.6, a global transition to renewable energy and mitigation of  
383 climate change corresponds to sustainable population growth and economic development.  
384 Driven by international cooperation on climate agreements, afforestation and bioenergy  
385 cropland become major land uses, while tropical deforestation is strongly reduced. In  
386 contrast, in SSP 5-RCP 8.5, business-as-usual development leads to catastrophic levels  
387 of warming, unsustainable population growth and increasing poverty, and massive land  
388 conversion<sup>89,90</sup>.

### 389 **Limiting dispersal capacity**

390 Not all species can disperse to all environments, and not all species have equal disper-  
391 sal capacity—in ways likely to covary with viral sharing properties. We follow a rule  
392 proposed by Schloss *et al.*<sup>31</sup>, who described an approximate formula for mammal range  
393 shift capacity based on body mass and trophic position. For carnivores, the maximum  
394 distance traveled in a generation is given as  $D = 40.7M^{0.81}$ , where  $D$  is distance in kilo-  
395 meters and  $M$  is body mass in kilograms. For herbivores and omnivores, the maximum  
396 is estimated as  $D = 3.31M^{0.65}$ .

397 We used mammalian diet data from the EltonTraits database<sup>91</sup>, and used the same  
398 cutoff as Schloss to identify carnivores as any species with 10% or less plants in their  
399 diet. We used body mass data from EltonTraits in the Schloss formula to estimate  
400 maximum generational dispersal, and converted estimates to annual maximum dispersal  
401 rates by dividing by generation length, as previously estimated by another comprehensive  
402 mammal dataset<sup>92</sup>. We multiply by 50 years and use the resulting distance as a buffer  
403 around the original range map, and constrain possible range shifts within that buffer. For  
404 420 species with missing data in one of the required sources, we interpolated dispersal  
405 distance based on the closest relative in our supertree with a dispersal velocity estimate.

406 Qualified by the downsides of assuming full dispersal<sup>93</sup>, we excluded bats from the  
407 assumed scaling of dispersal limitations. The original study by Schloss *et al.*<sup>31</sup> chose  
408 to omit bats entirely, and subsequent work has not proposed any alternative formula.  
409 Moreover, the Schloss formula performs notably poorly for bats: for example, it would  
410 assign the largest bat in our study, the Indian flying fox (*Pteropus giganteus*), a disper-  
411 sal capacity lower than that of the gray dwarf hamster (*Cricetulus migratorius*). Bats  
412 were instead given full dispersal in all scenarios: given significant evidence that some bat  
413 species regularly cover continental distances<sup>43,44</sup>, and that isolation by distance is uncom-  
414 mon within many bats' ranges<sup>46</sup>, we felt this was a defensible assumption for modeling  
415 purposes. Moving forward, the rapid range shifts already observed in many bat species

416 (see main text) could provide an empirical reference point to fit a new allometric scaling  
417 curve (after standardizing those results for the studies' many different methodologies).  
418 A different set of functional traits likely govern the scaling of bat dispersal, chiefly the  
419 aspect ratio (length:width) of wings, which is a strong predictor of population genetic  
420 differentiation<sup>46</sup>. Migratory status would also be important to include as a predictor  
421 although here, we exclude information on long-distance migration for all species (due to  
422 a lack of any real framework for adding that information to species distribution models  
423 in the literature).

## 424 **Explaining spatial patterns**

425 To explore the geography of novel assemblages, we used linear models which predicted the  
426 number of first encounters (novel overlap of species pairs) at the 25km level ( $N = 258, 539$   
427 grid cells). Explanatory variables included: richness (number of species inhabiting the  
428 grid cell in our predicted current ranges for the given scenario); elevation in meters (de-  
429 rived from the US Geological Service Global Multi-resolution Terrain Elevation Data  
430 2010 dataset); and the predominant land cover type for the grid cell. We simplified  
431 the classification scheme for land use types into five categories for these models (human  
432 settlement, cropland, rangeland and pasture, forest, and unforested wildland), and as-  
433 signed pixels a single land use type based on the maximum probability from the land  
434 use scenarios. We fitted a model for each scenario and pair of biological assumptions;  
435 because of the large effect bats had on the overall pattern, we retrained these models on  
436 subsets of encounters with and without a bat species involved. To help model fitting, we  
437  $\log(x+1)$ -transformed the response variable (number of overlaps in the pixel) and both  
438 continuous explanatory variables (meters of elevation above the lowest point and species  
439 richness). Because some elevation values were lower than 0 (i.e., below sea level), we  
440 treated elevation as meters above the lowest terrestrial point rather than meters above  
441 sea level to allow us to log-transform the data.

## 442 **Viral sharing models**

### 443 **Generalized Additive Mixed Models**

444 We used a previously-published model of the phylogeography of viral sharing patterns  
445 to make predictions of future viral sharing<sup>17</sup>. This model was based on an analysis of  
446 510 viruses shared between 682 mammal species<sup>3</sup>, and predicted the probability that a  
447 pair of mammal species will share a virus given their geographic range overlap and phy-  
448 logenetic relatedness. The original study uncovered strong, nonlinear effects of spatial  
449 overlap and phylogenetic similarity in determining viral sharing probability, and simu-

450 lating the unobserved global network using these effect estimates capitulated multiple  
451 macroecological patterns of viral sharing.

452 In the original study, a Generalized Additive Mixed Model (GAMM) was used to  
453 predict virus sharing as a binary variable, based on (1) geographic range overlap; (2) phy-  
454 logenetic similarity; and (3) species identity as a multi-membership random effect. The  
455 phylogeographic explanatory variables were obtained from two broadly available, low-  
456 resolution data sources: pairwise phylogenetic similarity was derived from a mammalian  
457 supertree previously modified for host-pathogen studies<sup>82,3</sup>, with similarity defined as  
458 the inverse of the cumulative branch length between two species, scaled to between 0  
459 and 1. Geographic overlap was defined as the area of overlap between two species' IUCN  
460 range maps, divided by their cumulative range size<sup>94</sup>.

461 We first retrained the GAMMs from<sup>17</sup> on the pairwise overlap matrix of species distri-  
462 bution models generated for this study, so that present predictions would be comparable  
463 with future distributions. Of the 3,139 species in our reduced dataset, 544 had viral  
464 records in our viral sharing dataset and shared with at least one other mammal, and  
465 were used to retrain the GAMM from<sup>17</sup>. To check the performance of the GAMM, we  
466 predicted sharing patterns with a) only random effects, b) only fixed effects, and c) with  
467 both. Although species-level random effects had a mean effect of  $\sim 0$ , excluding them en-  
468 tirely resulted in a substantial underestimation of the mean viral sharing rates across the  
469 network (mean sharing  $\approx 0.02$  compared to  $\approx 0.06$ ). Therefore to ensure that the model  
470 recapitulated traits of the observed network, we simulated 1,000 binary sharing networks  
471 when predicting with only fixed effects, randomly drawing species-level random effects  
472 in each iteration. The mean sharing value across these iterations closely approximated  
473 observed sharing probability ( $\sim 0.06$ ).

#### 474 **Model validation and limits**

475 Compared to the current viral sharing matrix, the model performs well with only fixed  
476 effects (AUC = 0.80) and extremely well with both fixed and random effects (AUC =  
477 0.93). The model explained a very similar proportion of the deviance in viral sharing to  
478 that in Albery *et al.*<sup>17</sup> (44.5% and 44.8% respectively).

479 In practice, several unpredictable but confounding factors could affect the reliability  
480 of this model as a forecasting tool, including temperature sensitivity of viral evolution in  
481 host jumps<sup>68</sup>, or increased susceptibility of animals with poorer health in lower-quality  
482 habitat or unfavorable climates. Moreover, once viruses can produce an infection, their  
483 ability to transmit *within* a new species is an evolutionary race between mutation and  
484 recombination rates in viral genomes, host innate and adaptive immunity, virulence-  
485 related mortality, and legacy constraints of coevolution with prior hosts and vectors<sup>60,61</sup>.

486 But data cataloging these precise factors are hardly comprehensive for the hundreds of  
487 zoonotic viruses, let alone for the thousands of undescribed viruses in wildlife. Moreover,  
488 horizontal transmission is not necessary for spillover potential to be considered significant;  
489 for example, viruses like rabies or West Nile virus are not transmitted within human  
490 populations but humans are still noteworthy hosts.

#### 491 **Mapping opportunities for sharing**

492 We used the GAMM effect estimates to predict viral sharing patterns across the 3,139  
493 mammals with associated geographic range and phylogenetic data, for both the present  
494 and future scenarios. By comparing current and future sharing probabilities for each of  
495 the four global change scenarios, we estimated which geographic and taxonomic patterns  
496 of viral sharing would likely emerge. We separately examined patterns of richness, pat-  
497 terns of sharing probability, and their change (i.e., future sharing probability - current  
498 sharing probability, giving the expected probability of a novel sharing event).

499 A subset of the mammals in our dataset were predicted to encounter each other for the  
500 first time during range shifts. For each of these pairwise first encounters, we extracted the  
501 area of overlap in every future scenario, and assigned each overlap a probability of sharing  
502 from the mean GAMM predictions and mapped the mean and cumulative probability of  
503 a new sharing event happening in a given geographic pixel.

#### 504 **Case study on Zaire ebolavirus**

505 For a case study in possible significant cross-species transmission, we compiled a list  
506 of known hosts of Zaire ebolavirus (ZEBOV), a zoonosis with high host breadth that  
507 has been known to cause wildlife die-offs, but has no known definitive reservoir. Hosts  
508 were taken from two sources: the training dataset on host-virus associations<sup>3</sup>, and an  
509 additional dataset of filovirus testing in bats<sup>30</sup>. In the latter case, any bats that have  
510 been reported antibody positive or PCR-positive for ZEBOV were included. A total  
511 of 13 current “known hosts” in Africa were used to predict current possible hosts, and  
512 first encounters in all scenarios. We restricted our analysis to Africa because there is  
513 no published evidence that Zaire ebolavirus actively circulates outside Africa; although  
514 some bat species outside Africa have tested positive for antibodies to ZEBOV, this is  
515 likely due to cross-reactivity with other undiscovered filoviruses<sup>95,96,30</sup>.

#### 516 **Overlap with human populations**

517 To examine the possibility that hotspots of cross-species transmission would overlap with  
518 human populations, we used SEDAC’s global population projections version 1.0 for the



519 year 2070<sup>97</sup>. We aggregated these to native resolution, for each of the four SSP paired  
520 with the native RCP/SSP pairing for the species distribution models. In Figure 4 we  
521 present the population projections for SSP 1, which pairs with RCP 2.6.

## 522 **Acknowledgements**

523 This paper is the culmination of several years of idea development and owes special thanks  
524 to many people, including the entire Bansal Lab, Laura Ward Alexander, Kevin Burgio,  
525 Eric Dougherty, Romain Garnier, Wayne Getz, Peta Hitchens, Christine Johnson, and  
526 Isabel Ott. We especially thank Laura Alexander for sharing bat filovirus testing sources  
527 used to compile the Ebola sub-network. Thanks are also extended to José Hidasi-Neto for  
528 publicly-available data visualization code. This research was supported by the George-  
529 town Environment Initiative and the National Socio-Environmental Synthesis Center  
530 (SESYNC) under funding received from the National Science Foundation DBI-1639145.  
531 C.M. acknowledges funding from National Science Foundation grant DBI-1913673.

## 532 **Author Contributions**

533 CJC and GFA conceived the study. CM, CJC, and CHT developed species distribution  
534 models; GFA, EAE, KJO, and NR developed the generalized additive models. CJC, GFA,  
535 and CMZ integrated the predictions of species distributions and viral sharing patterns  
536 and designed visualizations. All authors contributed to the writing of the manuscript.

537

## Figures

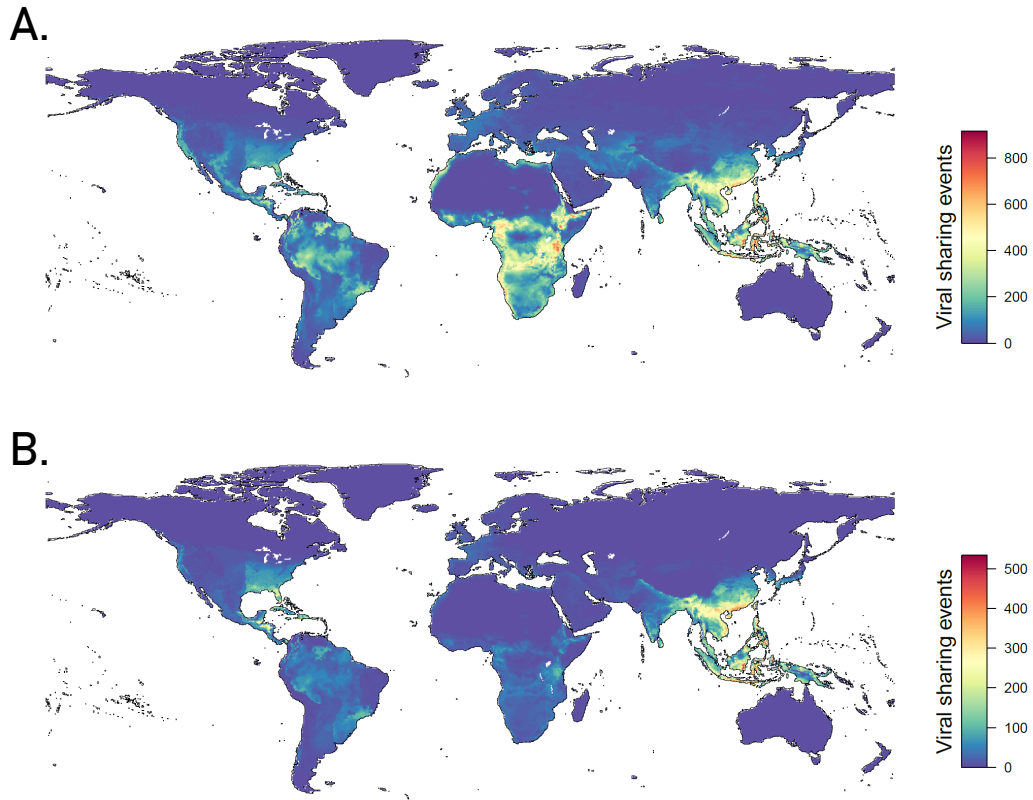

Figure 1: **Climate change will drive novel viral sharing among mammal species.** The projected number of novel viral sharing events among mammal species in 2070 based on host species geographic range shifts from climate change (RCP 2.6) and land-use change (SSP 1), without dispersal limits (A) and with dispersal limitation (B).

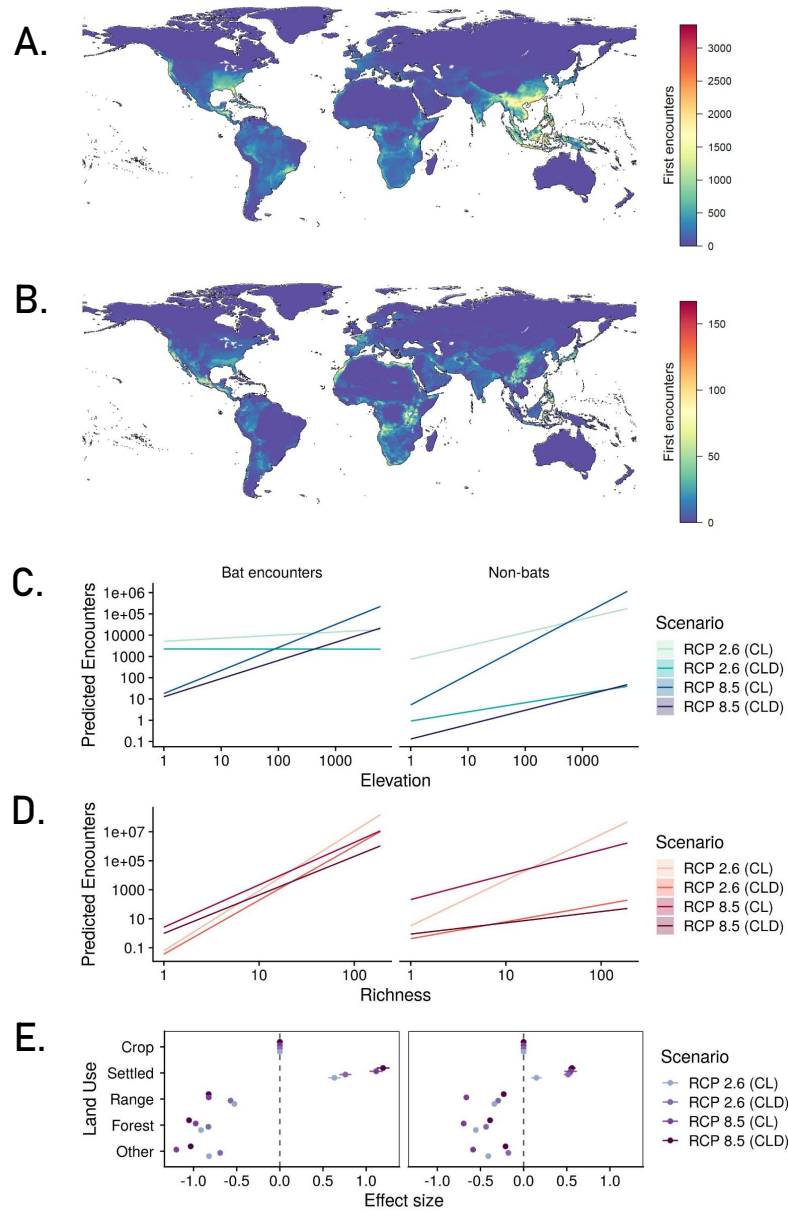

**Figure 2: Bats disproportionately drive future novel viral sharing.** The spatial pattern of first encounters differs among range-shifting mammal pairs including bat-bat and bat-nonbat encounters (A) and only encounters among non-bats (B). Using a linear model, we show that elevation (C), species richness (D), and land use (E) together explain 57.7% of deviance in new overlaps for bats, and 25.8% for non-bats. Slopes for the elevation effect were generally steeply positive: a  $\log_{10}$ -increase in elevation was associated with between a 0.4-1.41  $\log_{10}$ -increase in first encounters.

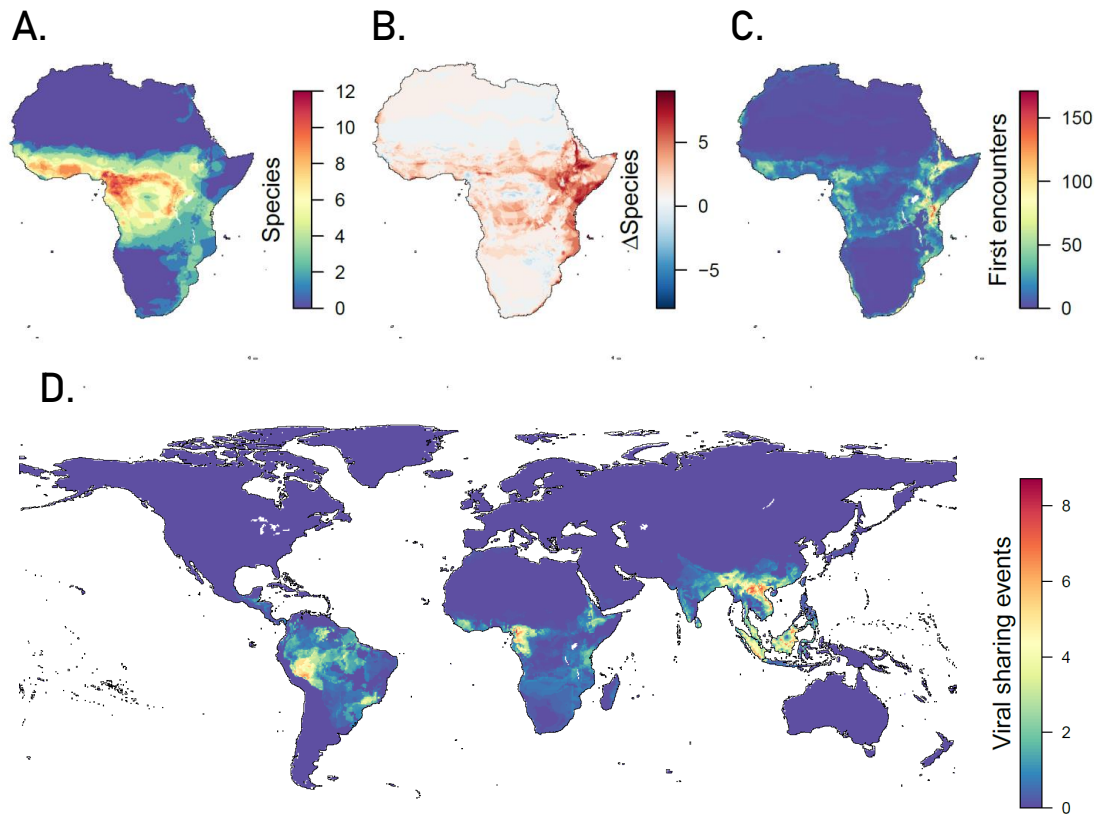

Figure 3: **Range expansions will expose naive hosts to zoonotic reservoirs.** (A) The predicted distribution of known African hosts of Zaire ebolavirus. (B) The change in richness of these hosts as a result of range shifts. (C) Projected first encounters with non-Ebola hosts. (D) Bat-primate first encounters are projected to occur globally, producing novel sharing events.

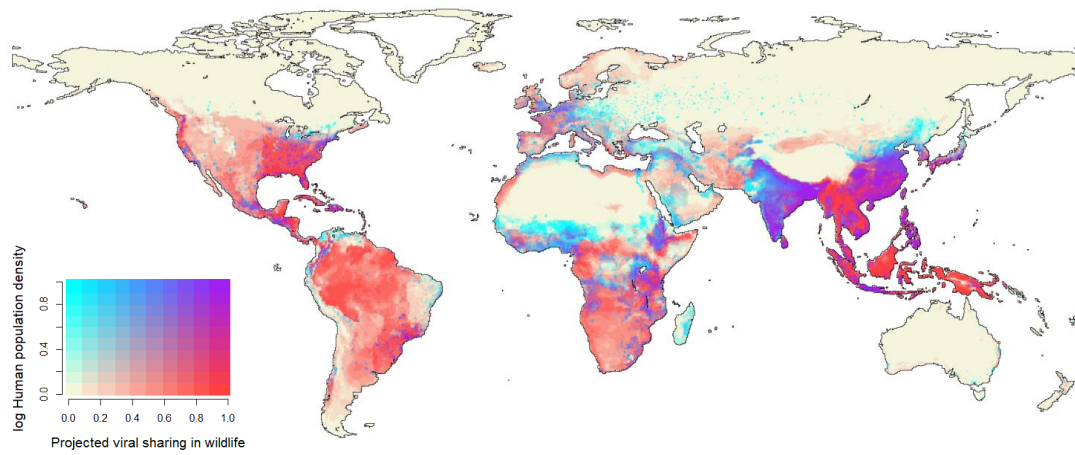

**Figure 4: Novel viral sharing events coincide with population centers.** In 2070 (RCP 2.6; climate only), human population centers in equatorial Africa, south China and southeast Asia will overlap with projected hotspots of cross-species viral transmission in wildlife. (Both variables are linearly rescaled to 0 to 1.)

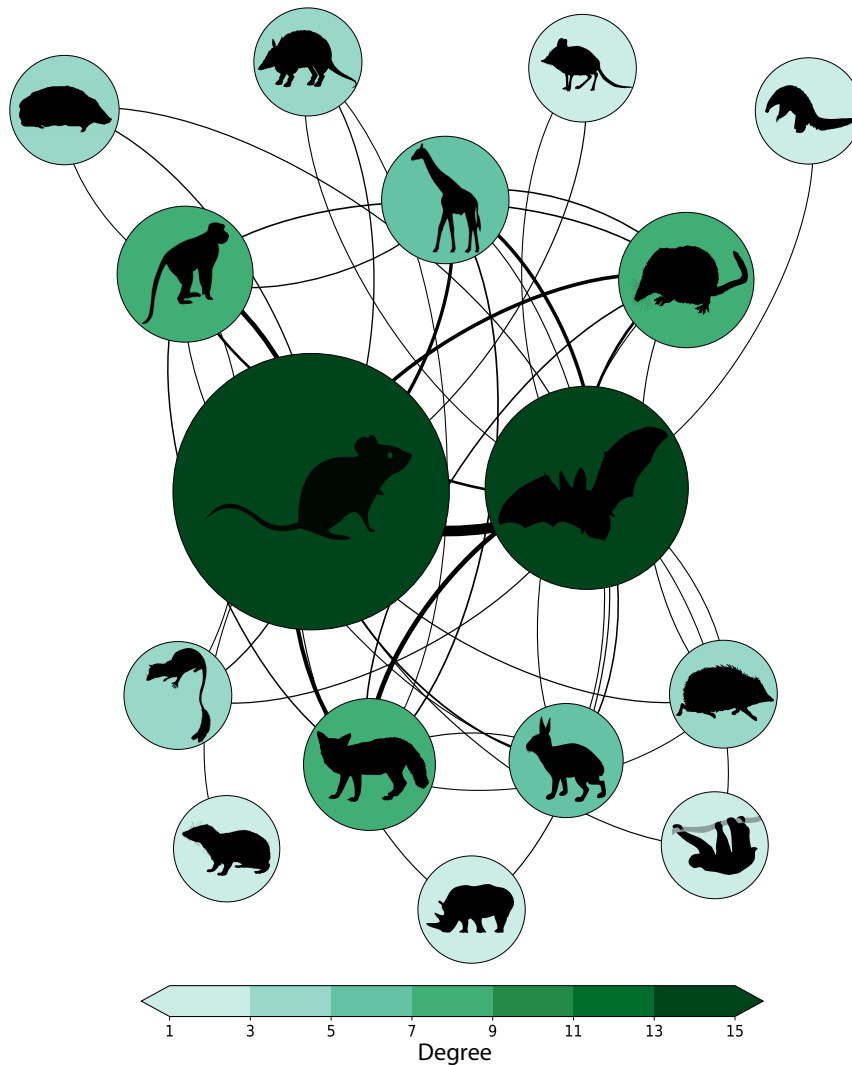

Extended Data Figure 1: **The mammal-virus network.** The present-day viral sharing network by mammal order inferred from modeled pairwise predictions of viral sharing probabilities. Edge width denotes the expected number of shared viruses (the sum of pairwise species-species viral sharing probabilities), with most sharing existing among the most speciose and closely-related groups. Edges shown in the network are the top 25% of links. Nodes are sized by total number of species in that order in the host-virus association dataset, color is scaled by degree.

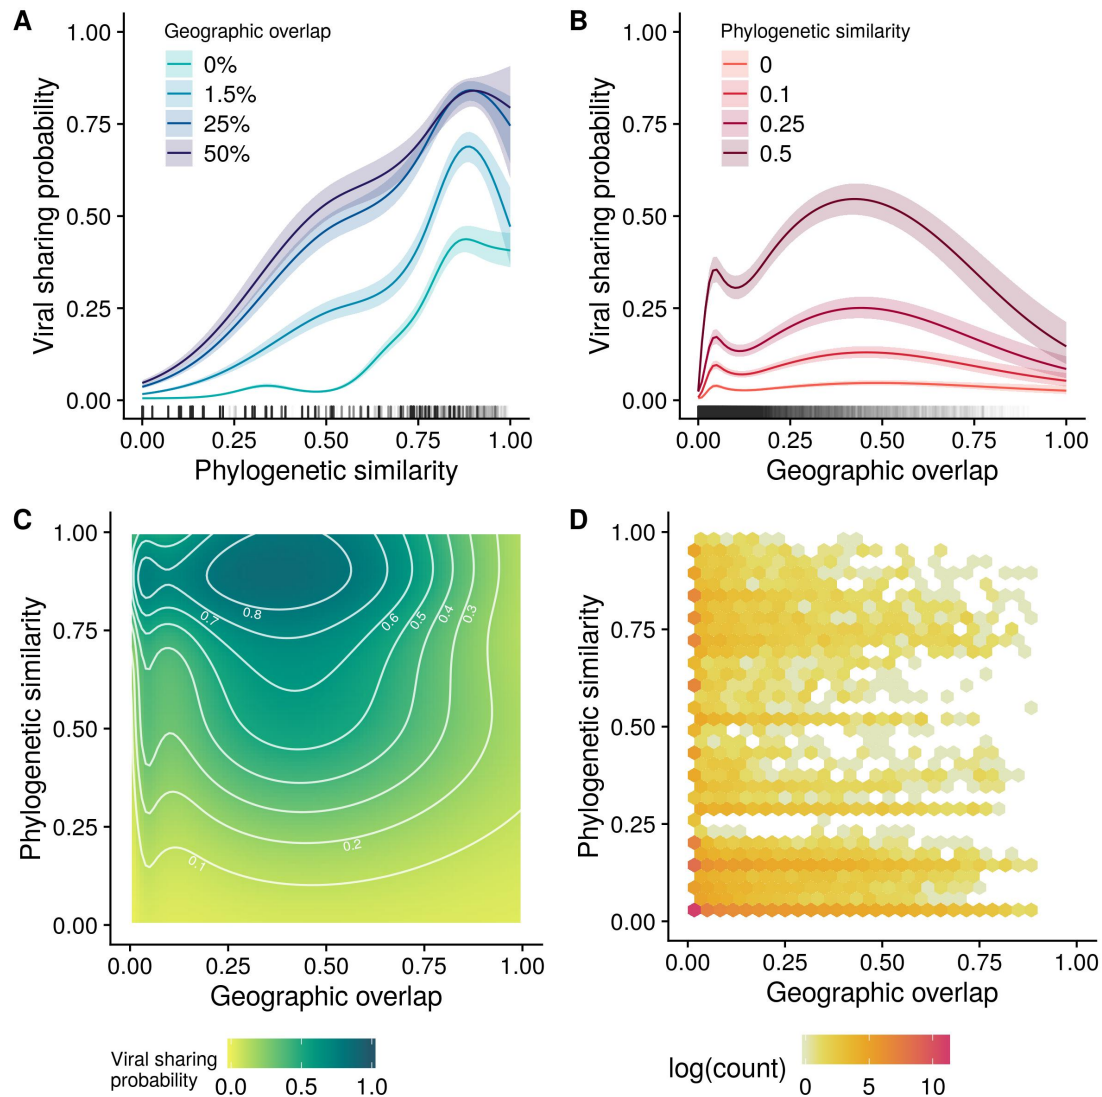

Extended Data Figure 2: **Predicted phylogeographic structure of viral sharing.** Phylogeographic prediction of viral sharing using a generalized additive mixed model. Viral sharing increases as a function of phylogenetic similarity (A) and geographic overlap (B), fit together as a tensor interaction (C). White contour lines denote 10% increments of sharing probability. Declines at high values of overlap may be an artefact of model structure and low sampling in the upper levels of geographic overlap, shown in a hexagonal bin chart for raw data (D).



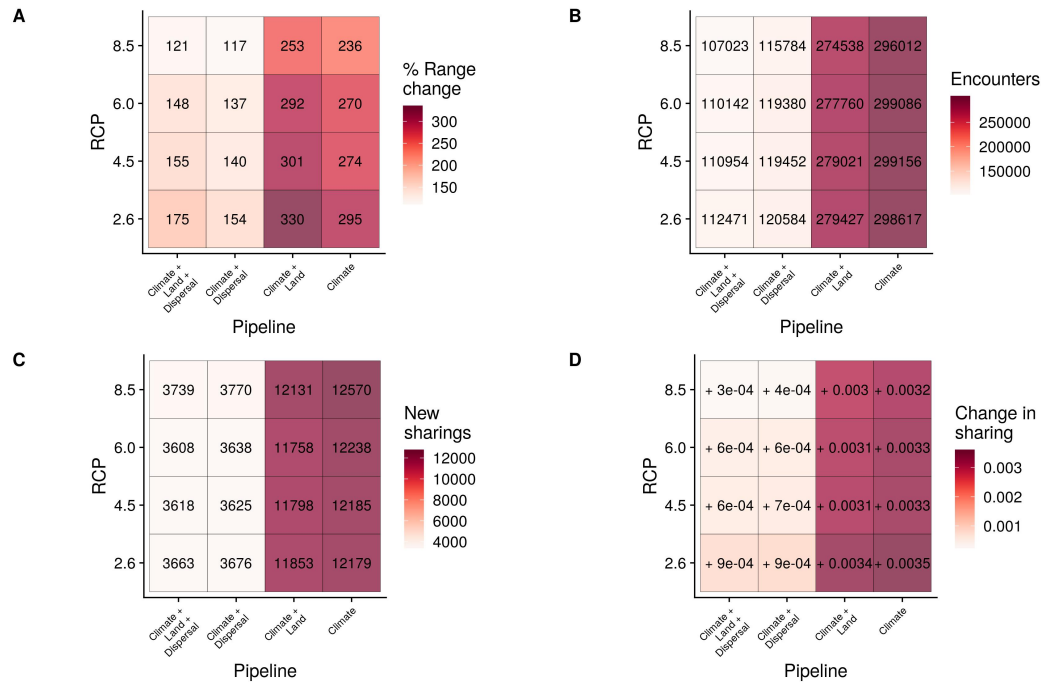

Extended Data Figure 3: **Outcomes by model formulation and climate change scenario.** Heatmaps displaying predicted changes across model formulations. (A) Range expansions were highest in non-dispersal-limited scenarios and in milder RCPs. (B) The number of predicted first encounters was higher in non-dispersal-limited scenarios and in milder RCPs. (C) The number of expected new viral sharing events was higher in non-dispersal-limited scenarios and in more severe RCPs. (D) The overall change in sharing probability (connectance) across the viral sharing network between the present day and the future scenarios; absolute change is minimal but positive across all scenarios, being greatest in non-dispersal-limited scenarios and in milder RCPs.

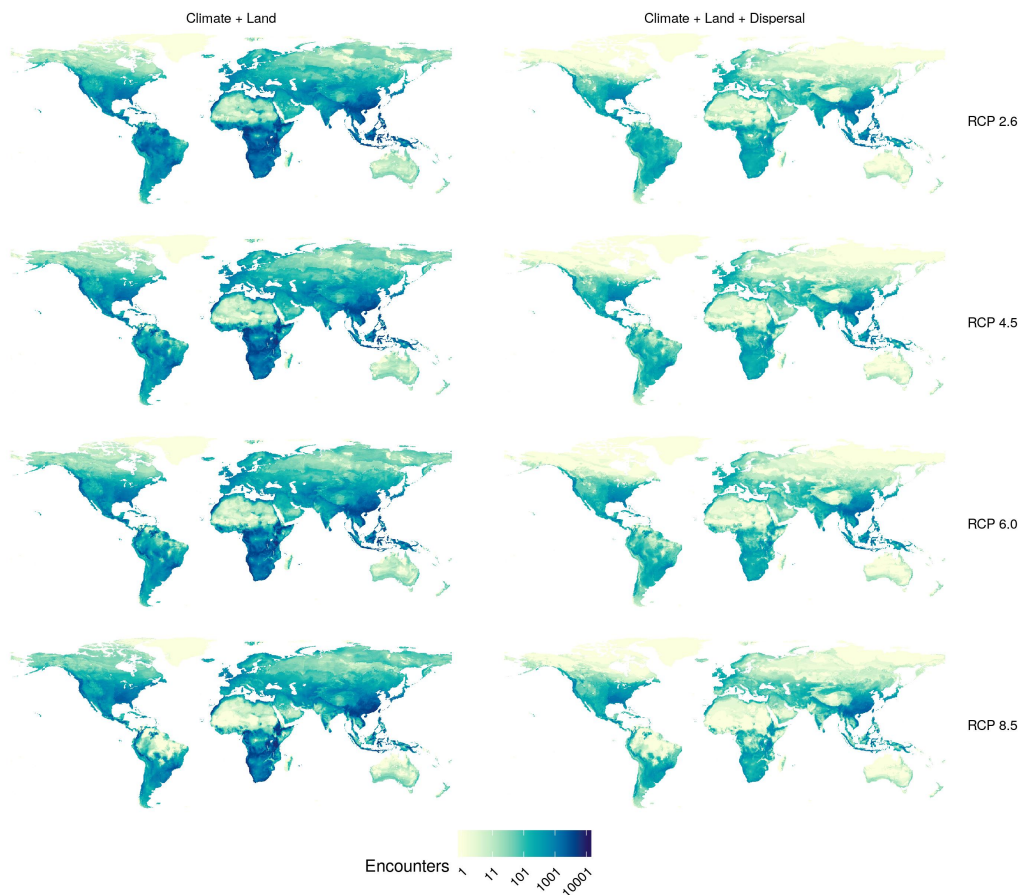

Extended Data Figure 4: **Geographic distribution of first encounters.** Predictions were carried out for four representative concentration pathways (RCPs), accounting for climate change and land use change, without (left) and with dispersal limits (right). Darker colours correspond to greater numbers of first encounters in the pixel.

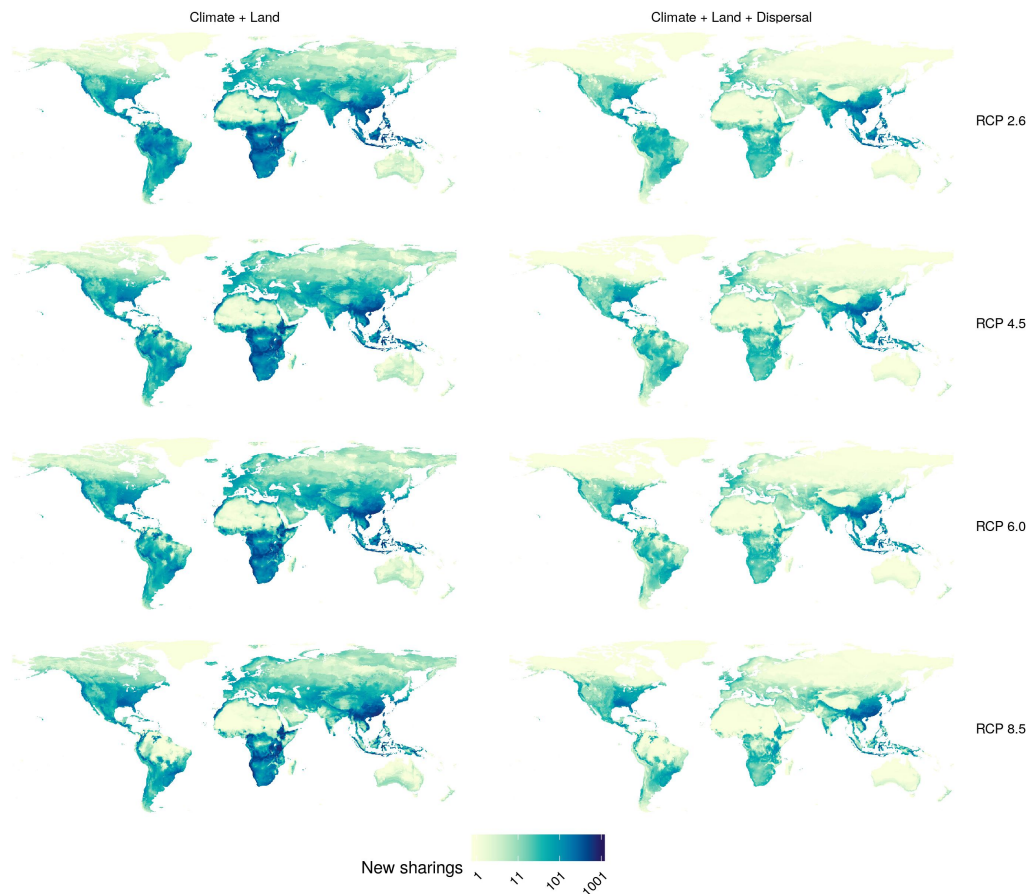

Extended Data Figure 5: **Geographic distribution of expected viral sharing events from first encounters.** Predictions were carried out for future distributions for four representative concentration pathways (RCPs), accounting for climate change and land use change, without (left) and with dispersal limits (right). Darker colours correspond to greater numbers of new viral sharing events in the pixel. Probability of new viral sharing was calculated by subtracting the species pair's present sharing probability from their sharing probability that our viral sharing GAMMs predicted. This probability was projected across the species pair's range intersection, and then summed across all novel species pairs in each pixel.

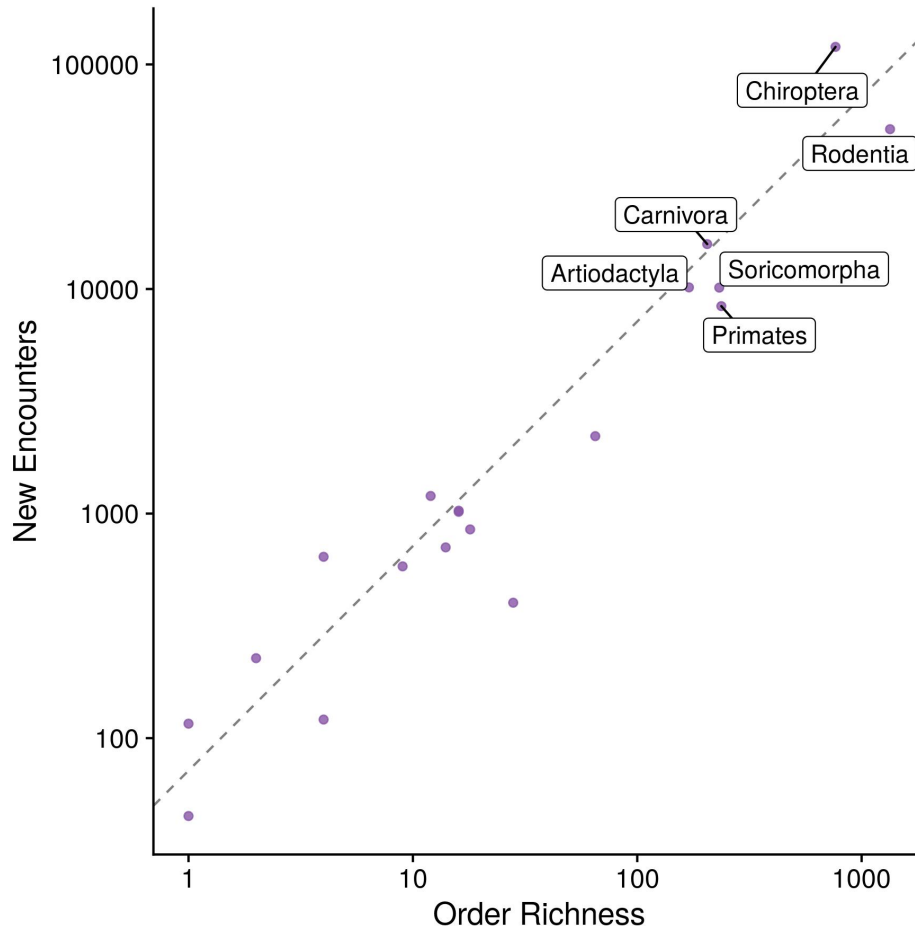

Extended Data Figure 6: **Order-level heterogeneity in first encounters.** Dispersal stratifies the number of first encounters (RCP 2.6 with all range filters), where some orders have more than expected at random, based on the mean number of first encounters and order size (line).

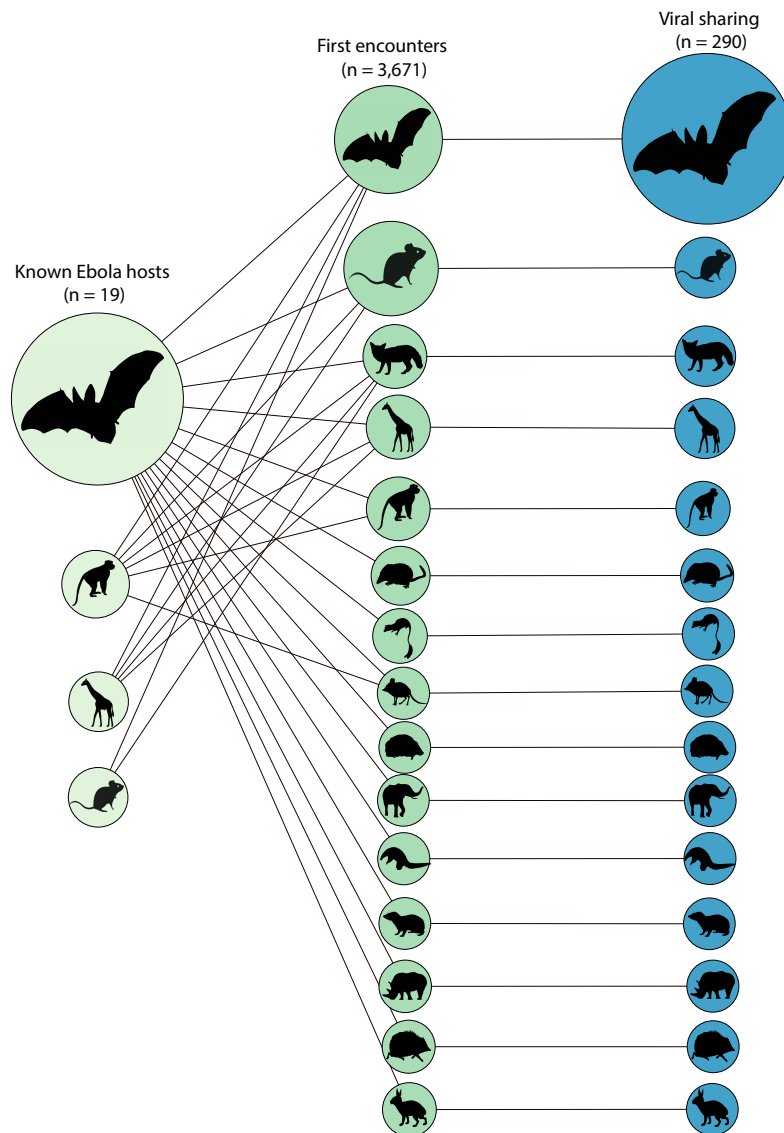

Extended Data Figure 7: **Projected viral sharing from suspected Ebola reservoirs is dominated by bats.** Node size is proportional to (left) the number of suspected Ebola host species in each order, which connect to (middle) first encounters with potentially naive host species; and (right) the number of projected viral sharing events in each receiving group. (Node size denotes proportions out of 100% within each column total.) While Ebola hosts will encounter a much wider taxonomic range of mammal groups than current reservoirs, the vast majority of viral sharing will occur disproportionately in bats.

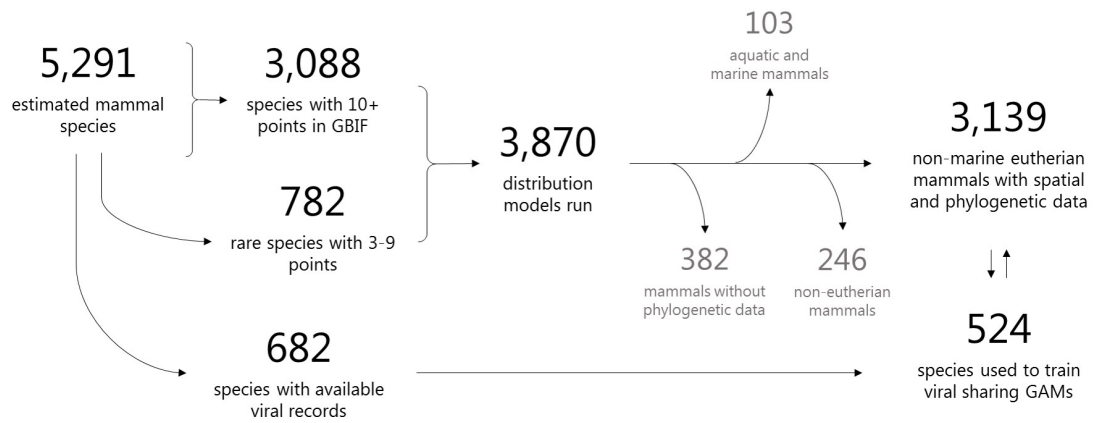

Extended Data Figure 8: **Data processing workflow.** Summary of species inclusion across the modeling pipeline for species distributions and viral sharing models. The final analyses in the main text use 3,139 species of Eutherian mammals across all scenarios.

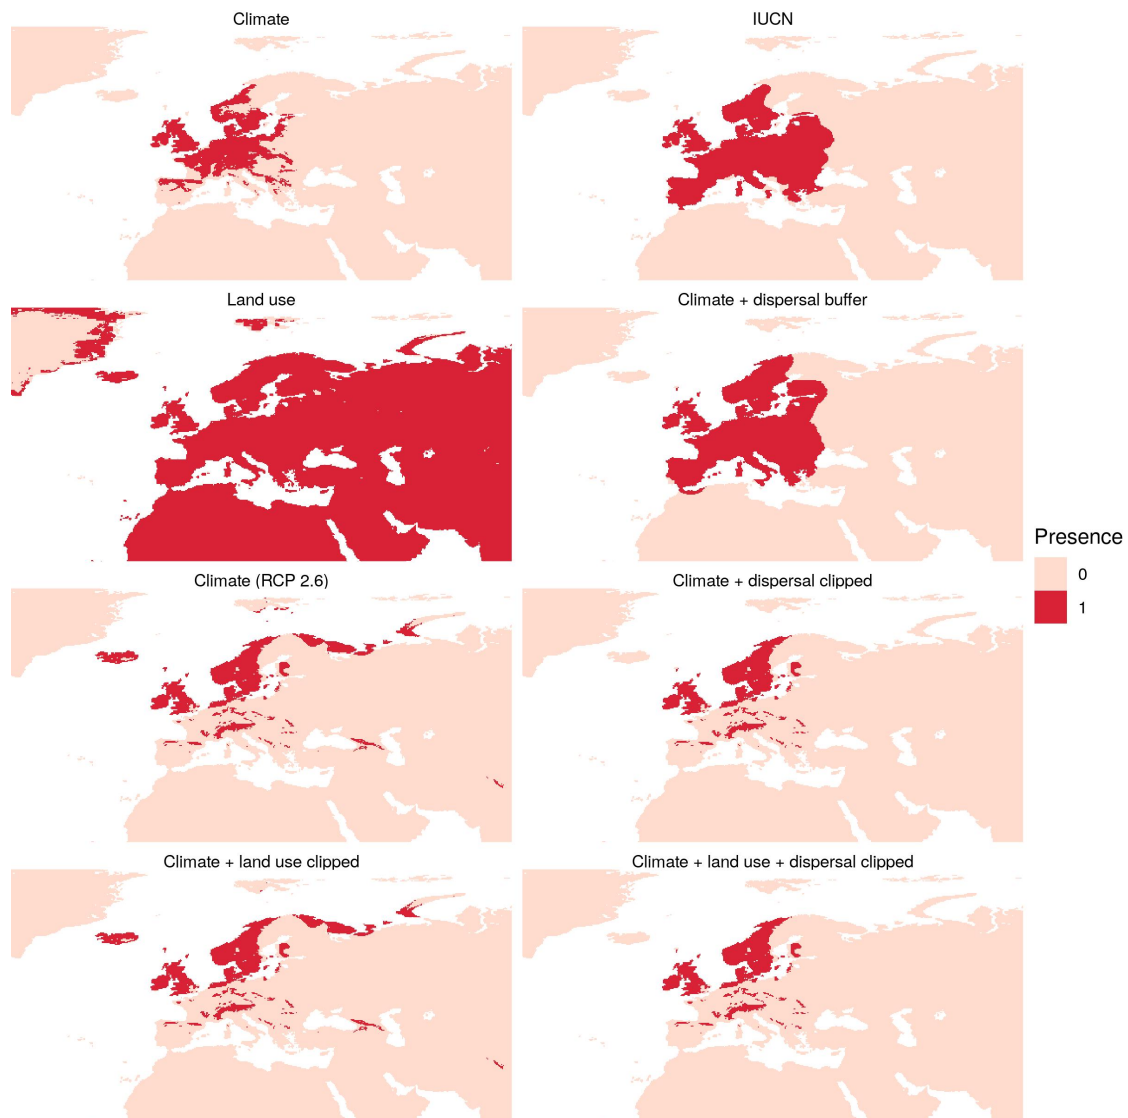

Extended Data Figure 9: **Species distribution modeling workflow for a single species.** A focal species (the European red deer, *Cervus elaphus*) is displayed as an illustrative example. The present day climate prediction (top left) was clipped to the same continent according to the IUCN distribution (top right). This was then clipped according to *Cervus elaphus* land use (second row, left). The known dispersal distance of the red deer was used to buffer the climate distribution (second row, right). The future distribution predictions (RCP 2.6 shown as an example) are displayed in the bottom four panels, for each of the four pipelines: only climate (third row, left); climate + dispersal clip (third row, right); climate + land use clip (bottom row, left) and climate + land use + dispersal clip (bottom row, right). The four distributions clearly display the limiting effect of the dispersal filter (bottom right panels) in reducing the probability of novel species interactions (bottom left panels). The land use clip had little effect on this species as the entire distribution area was habitable for the red deer.

## References

538

- 539 1. Carlson, C. J, Zipfel, C. M, Garnier, R, & Bansal, S. (2019) Global estimates  
540 of mammalian viral biodiversity accounting for host sharing. *Nature Ecology and*  
541 *Evolution* **3**, 1070–1075.
- 542 2. Carroll, D, Daszak, P, Wolfe, N. D, Gao, G. F, Morel, C. M, Morzaria, S, Pablos-  
543 Méndez, A, Tomori, O, & Mazet, J. A. (2018) The global virome project. *Science*  
544 **359**, 872–874.
- 545 3. Olival, K. J, Hosseini, P. R, Zambrana-Torrel, C, Ross, N, Bogich, T. L, & Daszak,  
546 P. (2017) Host and viral traits predict zoonotic spillover from mammals. *Nature*  
547 **546**, 646.
- 548 4. Altizer, S, Ostfeld, R. S, Johnson, P. T, Kutz, S, & Harvell, C. D. (2013) Climate  
549 change and infectious diseases: from evidence to a predictive framework. *Science*  
550 **341**, 514–519.
- 551 5. Cleaveland, S, Haydon, D, & Taylor, L. (2007) Overviews of pathogen emergence:  
552 which pathogens emerge, when and why? *Wildlife and Emerging Zoonotic Diseases:*  
553 *The Biology, Circumstances and Consequences of Cross-Species Transmission* pp.  
554 85–111.
- 555 6. Parrish, C. R, Holmes, E. C, Morens, D. M, Park, E.-C, Burke, D. S, Calisher, C. H,  
556 Laughlin, C. A, Saif, L. J, & Daszak, P. (2008) Cross-species virus transmission and  
557 the emergence of new epidemic diseases. *Microbiology and Molecular Biology Reviews*  
558 **72**, 457–470.
- 559 7. Woolhouse, M. E, Haydon, D. T, & Antia, R. (2005) Emerging pathogens: the  
560 epidemiology and evolution of species jumps. *Trends in Ecology & Evolution* **20**,  
561 238–244.
- 562 8. Hoberg, E. P & Brooks, D. R. (2015) Evolution in action: climate change, biodi-  
563 versity dynamics and emerging infectious disease. *Philosophical Transactions of the*  
564 *Royal Society B: Biological Sciences* **370**, 20130553.
- 565 9. Burrows, M. T, Schoeman, D. S, Richardson, A. J, Molinos, J. G, Hoffmann, A,  
566 Buckley, L. B, Moore, P. J, Brown, C. J, Bruno, J. F, Duarte, C. M, et al. (2014)  
567 Geographical limits to species-range shifts are suggested by climate velocity. *Nature*  
568 **507**, 492.



- 569 10. Chen, I.-C, Hill, J. K, Ohlemüller, R, Roy, D. B, & Thomas, C. D. (2011) Rapid  
570 range shifts of species associated with high levels of climate warming. *Science* **333**,  
571 1024–1026.
- 572 11. Carlson, C. J, Burgio, K. R, Dougherty, E. R, Phillips, A. J, Bueno, V. M, Clements,  
573 C. F, Castaldo, G, Dallas, T. A, Cizauskas, C. A, Cumming, G. S, et al. (2017) Par-  
574 asite biodiversity faces extinction and redistribution in a changing climate. *Science*  
575 *Advances* **3**, e1602422.
- 576 12. Wolfe, N. D, Dunavan, C. P, & Diamond, J. (2007) Origins of major human infectious  
577 diseases. *Nature* **447**, 279.
- 578 13. Lloyd-Smith, J. O, George, D, Pepin, K. M, Pitzer, V. E, Pulliam, J. R, Dobson,  
579 A. P, Hudson, P. J, & Grenfell, B. T. (2009) Epidemic dynamics at the human-animal  
580 interface. *Science* **326**, 1362–1367.
- 581 14. Plowright, R. K, Parrish, C. R, McCallum, H, Hudson, P. J, Ko, A. I, Graham,  
582 A. L, & Lloyd-Smith, J. O. (2017) Pathways to zoonotic spillover. *Nature Reviews*  
583 *Microbiology* **15**, 502.
- 584 15. Gould, S. J & Lewontin, R. C. (1979) The spandrels of San Marco and the Panglos-  
585 sian paradigm: a critique of the adaptationist programme. *Proceedings of the Royal*  
586 *Society of London. Series B: Biological Sciences* **205**, 581–598.
- 587 16. Alexander, K. A, Carlson, C. J, Lewis, B. L, Getz, W. M, Marathe, M. V, Eubank,  
588 S. G, Sanderson, C. E, & Blackburn, J. K. (2018) The ecology of pathogen spillover  
589 and disease emergence at the human-wildlife-environment interface. *The Connections*  
590 *Between Ecology and Infectious Disease* pp. 267–298.
- 591 17. Albery, G. F, Eskew, E. A, Ross, N, & Olival, K. J. (2019) Predicting the global  
592 mammalian viral sharing network using phylogeography. *bioRxiv* p. 732255.
- 593 18. Faria, N. R, Suchard, M. A, Rambaut, A, Streicker, D. G, & Lemey, P. (2013) Simul-  
594 taneously reconstructing viral cross-species transmission history and identifying the  
595 underlying constraints. *Philosophical Transactions of the Royal Society B: Biological*  
596 *Sciences* **368**, 20120196.
- 597 19. Dougherty, E. R, Seidel, D. P, Carlson, C. J, Spiegel, O, & Getz, W. M. (2018)  
598 Going through the motions: incorporating movement analyses into disease research.  
599 *Ecology Letters* **21**, 588–604.
- 600 20. Sun, B, Jia, L, Liang, B, Chen, Q, & Liu, D. (2018) Phylogeography, transmission,  
601 and viral proteins of Nipah virus. *Virologica Sinica* **33**, 385–393.

- 602 21. Huang, S, Bininda-Emonds, O. R, Stephens, P. R, Gittleman, J. L, & Altizer, S.  
603 (2014) Phylogenetically related and ecologically similar carnivores harbour similar  
604 parasite assemblages. *Journal of Animal Ecology* **83**, 671–680.
- 605 22. Davies, T. J & Pedersen, A. B. (2008) Phylogeny and geography predict pathogen  
606 community similarity in wild primates and humans. *Proceedings of the Royal Society*  
607 *B: Biological Sciences* **275**, 1695–1701.
- 608 23. Farrell, M. J & Davies, T. J. (2019) Disease mortality in domesticated animals is  
609 predicted by host evolutionary relationships. *Proceedings of the National Academy*  
610 *of Sciences* **116**, 7911–7915.
- 611 24. Longdon, B, Brockhurst, M. A, Russell, C. A, Welch, J. J, & Jiggins, F. M. (2014)  
612 The evolution and genetics of virus host shifts. *PLoS Pathogens* **10**, e1004395.
- 613 25. Streicker, D. G, Turmelle, A. S, Vonhof, M. J, Kuzmin, I. V, McCracken, G. F,  
614 & Rupprecht, C. E. (2010) Host phylogeny constrains cross-species emergence and  
615 establishment of rabies virus in bats. *Science* **329**, 676–679.
- 616 26. Jones, K. E, Patel, N. G, Levy, M. A, Storeygard, A, Balk, D, Gittleman, J. L, &  
617 Daszak, P. (2008) Global trends in emerging infectious diseases. *Nature* **451**, 990.
- 618 27. Allen, T, Murray, K. A, Zambrana-Torrel, C, Morse, S. S, Rondinini, C, Di Marco,  
619 M, Breit, N, Olival, K. J, & Daszak, P. (2017) Global hotspots and correlates of  
620 emerging zoonotic diseases. *Nature Communications* **8**, 1124.
- 621 28. Johnson, C. K, Hitchens, P. L, Evans, T. S, Goldstein, T, Thomas, K, Clements,  
622 A, Joly, D. O, Wolfe, N. D, Daszak, P, Karesh, W. B, et al. (2015) Spillover and  
623 pandemic properties of zoonotic viruses with high host plasticity. *Scientific Reports*  
624 **5**, 14830.
- 625 29. Han, B. A, Kramer, A. M, & Drake, J. M. (2016) Global patterns of zoonotic disease  
626 in mammals. *Trends in Parasitology* **32**, 565–577.
- 627 30. Han, B. A, Schmidt, J. P, Alexander, L. W, Bowden, S. E, Hayman, D. T, & Drake,  
628 J. M. (2016) Undiscovered bat hosts of filoviruses. *PLoS Neglected Tropical Diseases*  
629 **10**, e0004815.
- 630 31. Schloss, C. A, Nuñez, T. A, & Lawler, J. J. (2012) Dispersal will limit ability of  
631 mammals to track climate change in the western hemisphere. *Proceedings of the*  
632 *National Academy of Sciences* **109**, 8606–8611.

- 633 32. Loarie, S. R, Duffy, P. B, Hamilton, H, Asner, G. P, & Field, C. B. (2009) The  
634 velocity of climate change. *Nature* **462**, 1052–1055.
- 635 33. Hickling, R, Roy, D. B, Hill, J. K, Fox, R, & Thomas, C. D. (2006) The distributions  
636 of a wide range of taxonomic groups are expanding polewards. *Global Change Biology*  
637 **12**, 450–455.
- 638 34. Mason, S. C, Palmer, G, Fox, R, Gillings, S, Hill, J. K, Thomas, C. D, & Oliver,  
639 T. H. (2015) Geographical range margins of many taxonomic groups continue to  
640 shift polewards. *Biological Journal of the Linnean Society* **115**, 586–597.
- 641 35. Bebber, D. P, Ramotowski, M. A, & Gurr, S. J. (2013) Crop pests and pathogens  
642 move polewards in a warming world. *Nature Climate Change* **3**, 985.
- 643 36. Davidson, R, Simard, M, Kutz, S. J, Kapel, C. M, Hammes, I. S, & Robertson, L. J.  
644 (2011) Arctic parasitology: why should we care? *Trends in Parasitology* **27**, 239–245.
- 645 37. Hoberg, E. P, Cook, J, Agosta, S, Boeger, W, Galbreath, K, Laaksonen, S, Kutz, S,  
646 & Brooks, D. (2017) Arctic systems in the quaternary: ecological collision, faunal  
647 mosaics and the consequences of a wobbling climate. *Journal of Helminthology* **91**,  
648 409–421.
- 649 38. Trisos, C. H, Merow, C, & Pigot, A. L. (2020) Timing and abruptness of ecological  
650 disruption from climate change. *Nature* p. in press.
- 651 39. Colwell, R. K, Brehm, G, Cardelús, C. L, Gilman, A. C, & Longino, J. T. (2008)  
652 Global warming, elevational range shifts, and lowland biotic attrition in the wet  
653 tropics. *Science* **322**, 258–261.
- 654 40. Pauchard, A, Milbau, A, Albiñ, A, Alexander, J, Burgess, T, Daehler, C, Englund,  
655 G, Essl, F, Evengård, B, Greenwood, G. B, et al. (2016) Non-native and native  
656 organisms moving into high elevation and high latitude ecosystems in an era of  
657 climate change: new challenges for ecology and conservation. *Biological Invasions*  
658 **18**, 345–353.
- 659 41. Atkinson, C. T & LaPointe, D. A. (2009) Introduced avian diseases, climate change,  
660 and the future of hawaiian honeycreepers. *Journal of Avian Medicine and Surgery*  
661 **23**, 53–63.
- 662 42. Schloss, A. L, Kicklighter, D. W, Kaduk, J, Wittenberg, U, & Intercomparison,  
663 T. P. O. T. P. N. M. (1999) Comparing global models of terrestrial net primary  
664 productivity (NPP): comparison of NPP to climate and the Normalized Difference  
665 Vegetation Index (NDVI). *Global Change Biology* **5**, 25–34.

- 666 43. Peel, A. J, Sargan, D. R, Baker, K. S, Hayman, D. T, Barr, J. A, Cramer, G, Suu-  
667 Ire, R, Broder, C. C, Lembo, T, Wang, L.-F, et al. (2013) Continent-wide panmixia  
668 of an African fruit bat facilitates transmission of potentially zoonotic viruses. *Nature*  
669 *Communications* **4**, 2770.
- 670 44. Riesle-Sbarbaro, S. A, Amponsah-Mensah, K, De Vries, S, Nicolas, V, Lalis, A, Suu-  
671 Ire, R, Cunningham, A. A, Wood, J. L, & Sargan, D. R. (2018) The Gambian  
672 epauletted fruit bat shows increased genetic divergence in the Ethiopian highlands  
673 and in an area of rapid urbanization. *Ecology and Evolution* **8**, 12803–12820.
- 674 45. Wu, J. (2016) Detection and attribution of the effects of climate change on bat  
675 distributions over the last 50 years. *Climatic Change* **134**, 681–696.
- 676 46. Olival, K. (2012) Evolutionary and ecological correlates of population genetic struc-  
677 ture in bats. *Evolutionary history of bats fossils, molecules and morphology* pp.  
678 267–316.
- 679 47. Olival, K. J, Latinne, A, Islam, A, Epstein, J. H, Hersch, R, Engstrand, R. C, Gurley,  
680 E. S, Amato, G, Luby, S. P, & Daszak, P. (2019) Population genetics of fruit bat  
681 reservoir informs the dynamics, distribution and diversity of Nipah virus. *Molecular*  
682 *Ecology* p. in press.
- 683 48. Ancillotto, L, Santini, L, Ranc, N, Maiorano, L, & Russo, D. (2016) Extraordi-  
684 nary range expansion in a common bat: the potential roles of climate change and  
685 urbanisation. *The Science of Nature* **103**, 15.
- 686 49. Ancillotto, L, Budinski, I, Nardone, V, Di Salvo, I, Della Corte, M, Bosso, L, Conti,  
687 P, & Russo, D. (2018) What is driving range expansion in a common bat? hints  
688 from thermoregulation and habitat selection. *Behavioural Processes* **157**, 540–546.
- 689 50. Geluso, K, Mollhagen, T. R, Tigner, J. M, & Bogan, M. A. (2005) Westward expan-  
690 sion of the eastern pipistrelle (*Pipistrellus subflavus*) in the United States, including  
691 new records from New Mexico, South Dakota, and Texas. *Western North American*  
692 *Naturalist* **65**, 12.
- 693 51. Kurta, A, Winhold, L, Whitaker, J. O, & Foster, R. (2007) Range expansion and  
694 changing abundance of the eastern pipistrelle (Chiroptera: Vespertilionidae) in the  
695 central Great Lakes region. *The American Midland Naturalist* **157**, 404–412.
- 696 52. Lundy, M, Montgomery, I, & Russ, J. (2010) Climate change-linked range expan-  
697 sion of Nathusius' pipistrelle bat, *Pipistrellus nathusii* (Keyserling & Blasius, 1839).  
698 *Journal of Biogeography* **37**, 2232–2242.

- 699 53. McCracken, G. F, Bernard, R. F, Gamba-Rios, M, Wolfe, R, Krauel, J. J, Jones,  
700 D. N, Russell, A. L, & Brown, V. A. (2018) Rapid range expansion of the Brazilian  
701 free-tailed bat in the southeastern United States, 2008–2016. *Journal of Mammalogy*  
702 **99**, 312–320.
- 703 54. Roberts, B. J, Catterall, C. P, Eby, P, & Kanowski, J. (2012) Latitudinal range shifts  
704 in Australian flying-foxes: A re-evaluation. *Austral Ecology* **37**, 12–22.
- 705 55. Uhrin, M, Hüttmeir, U, Kipson, M, Estók, P, Sachanowicz, K, Bücs, S, Karapandža,  
706 B, Paunović, M, Presetnik, P, Bashta, A.-T, et al. (2016) Status of Savi's pipistrelle  
707 *Hypsugo savii* (Chiroptera) and range expansion in Central and south-eastern Eu-  
708 rope: a review. *Mammal Review* **46**, 1–16.
- 709 56. Brook, C. E & Dobson, A. P. (2015) Bats as 'special' reservoirs for emerging zoonotic  
710 pathogens. *Trends in Microbiology* **23**, 172–180.
- 711 57. Luis, A. D, Hayman, D. T, O'Shea, T. J, Cryan, P. M, Gilbert, A. T, Pulliam,  
712 J. R, Mills, J. N, Timonin, M. E, Willis, C. K, Cunningham, A. A, et al. (2013) A  
713 comparison of bats and rodents as reservoirs of zoonotic viruses: are bats special?  
714 *Proceedings of the Royal Society B: Biological Sciences* **280**, 20122753.
- 715 58. Olival, K. J, Weekley, C. C, & Daszak, P. (2015) Are bats really 'special' as viral  
716 reservoirs? what we know and need to know. *Bats and Viruses* pp. 281–294.
- 717 59. Wang, L.-F, Walker, P. J, & Poon, L. L. (2011) Mass extinctions, biodiversity and  
718 mitochondrial function: are bats 'special' as reservoirs for emerging viruses? *Current*  
719 *Opinion in Virology* **1**, 649–657.
- 720 60. Geoghegan, J. L, Senior, A. M, Di Giallonardo, F, & Holmes, E. C. (2016) Virological  
721 factors that increase the transmissibility of emerging human viruses. *Proceedings of*  
722 *the National Academy of Sciences* **113**, 4170–4175.
- 723 61. Walker, J. W, Han, B. A, Ott, I. M, & Drake, J. M. (2018) Transmissibility of  
724 emerging viral zoonoses. *PloS One* **13**, e0206926.
- 725 62. Pigott, D. M, Millelar, A. I, Earl, L, Morozoff, C, Han, B. A, Shearer, F. M, Weiss,  
726 D. J, Brady, O. J, Kraemer, M. U, Moyes, C. L, et al. (2016) Updates to the zoonotic  
727 niche map of Ebola virus disease in Africa. *Elife* **5**, e16412.
- 728 63. Bermejo, M, Rodríguez-Teijeiro, J. D, Illera, G, Barroso, A, Vilà, C, & Walsh, P. D.  
729 (2006) Ebola outbreak killed 5000 gorillas. *Science* **314**, 1564–1564.

- 730 64. Hayman, D. T. (2019) African primates: Likely victims, not reservoirs, of  
731 ebolaviruses. *The Journal of Infectious Diseases*.
- 732 65. Goldstein, T, Anthony, S. J, Gbakima, A, Bird, B. H, Bangura, J, Tremeau-Bravard,  
733 A, Belaganahalli, M. N, Wells, H. L, Dhanota, J. K, Liang, E, et al. (2018) The  
734 discovery of Bombali virus adds further support for bats as hosts of ebolaviruses.  
735 *Nature Microbiology* **3**, 1084.
- 736 66. Williams, J. N. (2013) Humans and biodiversity: population and demographic trends  
737 in the hotspots. *Population and Environment* **34**, 510–523.
- 738 67. Cheng, Y, Tjaden, N. B, Jaeschke, A, Lühken, R, Ziegler, U, Thomas, S. M, &  
739 Beierkuhnlein, C. (2018) Evaluating the risk for Usutu virus circulation in Europe:  
740 comparison of environmental niche models and epidemiological models. *International*  
741 *Journal of Health Geographics* **17**, 35.
- 742 68. Roberts, K. E, Hadfield, J. D, Sharma, M. D, & Longdon, B. (2018) Changes in  
743 temperature alter the potential outcomes of virus host shifts. *PLoS Pathogens* **14**,  
744 e1007185.
- 745 69. Faust, C. L, Dobson, A. P, Gottdenker, N, Bloomfield, L. S, McCallum, H. I, Gille-  
746 spie, T. R, Diuk-Wasser, M, & Plowright, R. K. (2017) Null expectations for disease  
747 dynamics in shrinking habitat: dilution or amplification? *Philosophical Transactions*  
748 *of the Royal Society B: Biological Sciences* **372**, 20160173.
- 749 70. Cunningham, A. (2018) *Infectious disease threats to amphibian conservation*. (Glas-  
750 gow Natural History Society), Vol. 27.
- 751 71. VanWormer, E, Mazet, J, Hall, A, Gill, V, Boveng, P, London, J, Gelatt, T, Fadely,  
752 B, Lander, M, Sterling, J, et al. (2019) Viral emergence in marine mammals in the  
753 North Pacific may be linked to Arctic sea ice reduction. *Scientific Reports* **9**, 1–11.
- 754 72. Grubbs, F. E et al. (1950) Sample criteria for testing outlying observations. *The*  
755 *Annals of Mathematical Statistics* **21**, 27–58.
- 756 73. Renner, I. W, Elith, J, Baddeley, A, Fithian, W, Hastie, T, Phillips, S. J, Popovic,  
757 G, & Warton, D. I. (2015) Point process models for presence-only analysis. *Methods*  
758 *in Ecology and Evolution* **6**, 366–379.
- 759 74. Friedman, J, Hastie, T, & Tibshirani, R. (2010) Regularization paths for generalized  
760 linear models via coordinate descent. *Journal of Statistical Software* **33**, 1.

- 761 75. Phillips, S. J, Anderson, R. P, & Schapire, R. E. (2006) Maximum entropy modeling  
762 of species geographic distributions. *Ecological Modelling* **190**, 231–259.
- 763 76. Fick, S. E & Hijmans, R. J. (2017) WorldClim 2: new 1-km spatial resolution climate  
764 surfaces for global land areas. *International Journal of Climatology* **37**, 4302–4315.
- 765 77. Hastie, T, Tibshirani, R, & Friedman, J. H. (2009) *The elements of statistical learn-*  
766 *ing: data mining, inference, and prediction*. (Springer-Verlag, New York), 2nd edi-  
767 tion.
- 768 78. Drake, J. M. (2015) Range bagging: a new method for ecological niche modelling  
769 from presence-only data. *Journal of The Royal Society Interface* **12**, 20150086–9.
- 770 79. Drake, J. M & Richards, R. L. (2018) Estimating environmental suitability. *Ecosphere*  
771 **9**, e02373.
- 772 80. Hurtt, G. C, Chini, L. P, Frohking, S, Betts, R, Feddema, J, Fischer, G, Fisk, J,  
773 Hibbard, K, Houghton, R, Janetos, A, et al. (2011) Harmonization of land-use  
774 scenarios for the period 1500–2100: 600 years of global gridded annual land-use  
775 transitions, wood harvest, and resulting secondary lands. *Climatic Change* **109**, 117.
- 776 81. Hurtt, G, Chini, L, Sahajpal, R, Frohking, S, Bodirsky, B, Calvin, K, Doelman, J,  
777 Fisk, J, Fujimori, S, Goldewijk, K, et al. (2018) *LUH2: Harmonization of global*  
778 *land-use scenarios for the period 850-2100*.
- 779 82. Fritz, S. A, Bininda-Emonds, O. R, & Purvis, A. (2009) Geographical variation in  
780 predictors of mammalian extinction risk: big is bad, but only in the tropics. *Ecology*  
781 *Letters* **12**, 538–549.
- 782 83. Jones, K. E, Bielby, J, Cardillo, M, Fritz, S. A, O’Dell, J, Orme, C. D. L, Safi,  
783 K, Sechrest, W, Boakes, E. H, Carbone, C, et al. (2009) PanTHERIA: a species-  
784 level database of life history, ecology, and geography of extant and recently extinct  
785 mammals: Ecological Archives E090-184. *Ecology* **90**, 2648–2648.
- 786 84. Jetz, W, Wilcove, D. S, & Dobson, A. P. (2007) Projected impacts of climate and  
787 land-use change on the global diversity of birds. *PLoS Biology* **5**, e157.
- 788 85. Pecl, G. T, Araújo, M. B, Bell, J. D, Blanchard, J, Bonebrake, T. C, Chen, I.-C,  
789 Clark, T. D, Colwell, R. K, Danielsen, F, Evengård, B, et al. (2017) Biodiversity  
790 redistribution under climate change: Impacts on ecosystems and human well-being.  
791 *Science* **355**, eaai9214.

- 792 86. Powers, R. P & Jetz, W. (2019) Global habitat loss and extinction risk of terrestrial  
793 vertebrates under future land-use-change scenarios. *Nature Climate Change* **9**, 323.
- 794 87. Hurtt, G. C, Chini, L. P, Frohking, S, Betts, R. A, Feddema, J, Fischer, G, Fisk, J. P,  
795 Hibbard, K, Houghton, R. A, Janetos, A, Jones, C. D, Kindermann, G, Kinoshita,  
796 T, Klein Goldewijk, K, Riahi, K, Shevliakova, E, Smith, S, Stehfest, E, Thomson,  
797 A, Thornton, P, van Vuuren, D. P, & Wang, Y. P. (2011) Harmonization of land-  
798 use scenarios for the period 1500–2100: 600 years of global gridded annual land-use  
799 transitions, wood harvest, and resulting secondary lands. *Climatic Change* **109**,  
800 117–161.
- 801 88. van Vuuren, D. P, Riahi, K, Calvin, K, Dellink, R, Emmerling, J, Fujimori, S, Kc, S,  
802 Kriegler, E, & O’Neill, B. (2017) The Shared Socio-economic Pathways: Trajectories  
803 for human development and global environmental change. *Global Environmental*  
804 *Change* **42**, 148–152.
- 805 89. Popp, A, Calvin, K, Fujimori, S, Havlik, P, Humpenöder, F, Stehfest, E, Bodirsky,  
806 B. L, Dietrich, J. P, Doelmann, J. C, Gusti, M, et al. (2017) Land-use futures in the  
807 shared socio-economic pathways. *Global Environmental Change* **42**, 331–345.
- 808 90. Riahi, K, van Vuuren, D. P, Kriegler, E, Edmonds, J, O’Neill, B. C, Fujimori, S,  
809 Bauer, N, Calvin, K, Dellink, R, Fricko, O, Lutz, W, Popp, A, Cuaresma, J. C, Kc,  
810 S, Leimbach, M, Jiang, L, Kram, T, Rao, S, Emmerling, J, Ebi, K, Hasegawa, T,  
811 Havlik, P, Humpenöder, F, Da Silva, L. A, Smith, S, Stehfest, E, Bosetti, V, Eom,  
812 J, Gernaat, D, Masui, T, Rogelj, J, Strefler, J, Drouet, L, Krey, V, Luderer, G,  
813 Harmsen, M, Takahashi, K, Baumstark, L, Doelman, J. C, Kainuma, M, Klimont, Z,  
814 Marangoni, G, Lotze-Campen, H, Obersteiner, M, Tabeau, A, & Tavoni, M. (2017)  
815 The Shared Socioeconomic Pathways and their energy, land use, and greenhouse gas  
816 emissions implications: An overview. *Global Environmental Change* **42**, 153–168.
- 817 91. Wilman, H, Belmaker, J, Simpson, J, de la Rosa, C, Rivadeneira, M. M, & Jetz,  
818 W. (2014) Eltontraits 1.0: Species-level foraging attributes of the world’s birds and  
819 mammals: Ecological archives e095-178. *Ecology* **95**, 2027–2027.
- 820 92. Pacifici, M, Santini, L, Di Marco, M, Baisero, D, Francucci, L, Marasini, G. G,  
821 Visconti, P, & Rondinini, C. (2013) Generation length for mammals. *Nature Con-*  
822 *servation* **5**, 89.
- 823 93. Bateman, B. L, Murphy, H. T, Reside, A. E, Mokany, K, & VanDerWal, J. (2013)  
824 Appropriateness of full-, partial-and no-dispersal scenarios in climate change impact  
825 modelling. *Diversity and Distributions* **19**, 1224–1234.



- 826 94. Araújo, M. B, Rozenfeld, A, Rahbek, C, & Marquet, P. A. (2011) Using species co-  
827 occurrence networks to assess the impacts of climate change. *Ecography* **34**, 897–908.
- 828 95. Olival, K. J, Islam, A, Yu, M, Anthony, S. J, Epstein, J. H, Khan, S. A, Khan, S. U,  
829 Cramer, G, Wang, L.-F, Lipkin, W. I, et al. (2013) Ebola virus antibodies in fruit  
830 bats, Bangladesh. *Emerging Infectious Diseases* **19**, 270.
- 831 96. Yang, X.-L, Zhang, Y.-Z, Jiang, R.-D, Guo, H, Zhang, W, Li, B, Wang, N, Wang,  
832 L, Waruhiu, C, Zhou, J.-H, et al. (2017) Genetically diverse filoviruses in *Rousettus*  
833 and *Eonycteris* spp. bats, China, 2009 and 2015. *Emerging Infectious Diseases* **23**,  
834 482.
- 835 97. Gao, J. (2017) Downscaling global spatial population projections from 1/8-degree  
836 to 1-km grid cells, (NCAR technical note NCAR/TN-537+ STR. Boulder, Colorado:  
837 National Center for Atmospheric Research), Technical report.
