# Climate change will drive novel cross-species viral transmission

Colin J. Carlson<sup>1,2,†</sup>, Gregory F. Albery<sup>1,3,†</sup>, Cory Merow<sup>4</sup>, Christopher H. Trisos<sup>5</sup>, Casey M. Zipfel<sup>1</sup>, Evan A. Eskew<sup>3,6</sup>, Kevin J. Olival<sup>3</sup>, Noam Ross<sup>3</sup>, and Shweta Bansal<sup>1</sup>

<sup>1</sup>*Department of Biology, Georgetown University, Washington, D.C., USA.*

<sup>2</sup>*Center for Global Health Science & Security, Georgetown University, Washington, D.C., USA.*

<sup>3</sup>*EcoHealth Alliance, New York, NY, USA.*

<sup>4</sup>*Ecology and Evolutionary Biology, University of Connecticut, Storrs, CT, USA.*

<sup>5</sup>*African Climate and Development Initiative, University of Cape Town, Cape Town, South Africa.*

<sup>6</sup>*Department of Biology, Pacific Lutheran University, Tacoma, WA, USA.*

<sup>†</sup>*These authors share equal authorship.*

April 19, 2021

20

## Abstract

21

22

23

24

25

26

27

28

29

30

31

32

33

34

35

36

37

38

39

40

41

At least 10,000 species of mammal virus are estimated to have the potential to spread in human populations, but the vast majority are currently circulating in wildlife, largely undescribed and undetected by disease outbreak surveillance<sup>1,2,3</sup>. In addition, changing climate and land use are already driving geographic range shifts in wildlife, producing novel species assemblages and opportunities for viral sharing between previously isolated species<sup>4,5</sup>. In some cases, this will inevitably facilitate spillover into humans<sup>6,7</sup>—a possible mechanistic link between global environmental change and emerging zoonotic disease<sup>8</sup>. Here, we map potential hotspots of viral sharing, using a phylogeographic model of the mammal-virus network, and projections of potential geographic range shifts for 3,139 mammal species under climate change and land use scenarios for the year 2070. Range-shifting mammal species are predicted to aggregate at high elevations, in biodiversity hotspots, and in areas of high human population density in Asia and Africa, driving the novel cross-species transmission of their viruses an estimated 4,000 times. Counter to expectations, holding warming under 2°C within the century does not reduce new viral sharing, due to greater potential range expansions—highlighting the need to invest in surveillance even in a low-warming future. Most projected viral sharing is driven by diverse hyperreservoirs (rodents and bats) and large-bodied predators (carnivores). Because of their unique dispersal capacity, bats account for the majority of novel viral sharing, and are likely to share viruses along evolutionary pathways that could facilitate future emergence in humans. Our findings highlight the urgent need to pair viral surveillance and discovery efforts with biodiversity surveys tracking species' range shifts, especially in tropical countries that harbor the most emerging zoonoses.

## 42 Main Text

43 In the face of rapid environmental change, survival for many species depends on moving to  
44 track shifting climates. Even in a best case scenario, many species' geographic ranges are pro-  
45 jected to shift a hundred kilometers or more in the next century<sup>9,10</sup>. In the process, many an-  
46 imals will bring their parasites and pathogens into new environments<sup>4,11</sup>. This poses a mea-  
47 surable threat to global health, particularly given several recent epidemics and pandemics of  
48 viruses that originate in wildlife (zoonotic viruses, or zoonoses)<sup>12,1,13</sup>. Most frameworks for  
49 predicting cross-species transmission therefore focus on the steps that allow animal pathogens  
50 to make the leap to human hosts (a process called spillover)<sup>13,14,15</sup>. However, zoonotic viruses  
51 are a small fraction of total viral diversity, and viral evolution is an undirected process<sup>16</sup>, in  
52 which humans are only one of over 5,000 mammal hosts with over 12 million possible pair-  
53 wise combinations<sup>17</sup> (to say nothing of the other four classes of vertebrates, which have a much  
54 greater fraction of undescribed viral diversity). If those host species track shifting climates, they  
55 will share viruses not just with humans, but with each other, for the very first time<sup>8</sup>. Despite  
56 their indisputable significance, spillover events are probably just the tip of the iceberg; by num-  
57 bers alone, most cross-species transmission events attributable to climate change will probably  
58 occur among wildlife hosts, potentially threatening wildlife populations and largely undetected  
59 by zoonotic disease surveillance.

60 The scale of this process will depend on *opportunity* and *compatibility*<sup>13,18,19</sup>, and both dimen-  
61 sions pose an important predictive challenge. Because only a few species are common world-  
62 wide, most hosts have no *opportunity* to exchange pathogens: of all possible pairs of mammal  
63 species, only ~7% share any geographic range, and only ~6% are currently known to host one  
64 or more of the same virus species (hereafter *viral sharing*)<sup>18</sup>. As host geographic ranges shift,  
65 some interactions will become possible for the first time, and a subset will lead to viral estab-  
66 lishment in a previously-inaccessible host (*novel viral sharing*). The potential ability of species  
67 to track shifting climate and habitat conditions will determine which pairs of species encounter  
68 each other for the first time<sup>4,20</sup>. Even if species' ranges nominally overlap, habitat selection and  
69 behavioral differences can further limit contact<sup>20</sup>. Although some viruses spread environmen-  
70 tally or by arthropod vectors between spatially proximate species with no direct behavioral con-  
71 tact<sup>21</sup>, sharing is more likely on average among species with more ecological overlap<sup>22</sup>. Even  
72 among species in close contact, most cross-species transmission events are still a dead end. Pro-  
73 gressively smaller subsets of viruses can infect novel host cells, proliferate, cause disease, and  
74 transmit onward in a new host<sup>19</sup>. Their ability to do so is determined by *compatibility* between  
75 viral structures, host cell receptors, and host immunity<sup>6</sup>. Because closely-related species share  
76 both ecological and immunological traits through identity by descent, phylogeny is a strong  
77 predictor of pathogen sharing<sup>18,23</sup> and of susceptibility to invasion by new viruses<sup>24,25,26</sup>. In a  
78 changing world, these mechanisms can help predict how ecosystem turnover could impact the  
79 global virome.

80 Although several studies have mapped current hotspots of emerging diseases<sup>3,12,27</sup>, few  
81 have forecasted them in the context of global change. With the global reassortment of ani-  
82 mal biodiversity due to climate and land use change, it is unknown whether bats and rodents  
83 will still play a central role in viral emergence<sup>3,28</sup> (ED Figure 1), or whether hotspots of vi-

84 ral emergence will stay in tropical rainforests<sup>27,29</sup>, which currently harbor most undiscovered  
85 viruses<sup>3,30</sup>. Here, by projecting potential geographic range shifts (that is, newly suitable habitat,  
86 which a species may or may not migrate to) and applying mechanistic biological rules for cross-  
87 species transmission, we predicted how and where global change could potentially create novel  
88 opportunities for viral sharing, with particular attention to the potential connections between  
89 these risks and human health. We focused on mammals because they have some of the most  
90 complete biodiversity data, the highest proportion of viral diversity described<sup>1</sup>, and the great-  
91 est downstream relevance to human health and zoonotic disease emergence of any vertebrate  
92 class. We built species distribution models (SDMs) for 3,870 placental mammal species, and  
93 projected potential geographic range shifts based on four paired scenarios for climate change  
94 (Representative Concentration Pathways, RCPs) and land use change (Shared Socioeconomic  
95 Pathways, SSPs) by 2070. These scenarios characterize alternative futures for global environ-  
96 mental change, from sustainable land use change and a high chance of keeping global warming  
97 under 2°C (SSP1-RCP2.6), to a high chance of 4°C warming, continued fossil fuel reliance, and  
98 rapid land degradation and change (SSP5-RCP8.5; see “Methods” for a detailed explanation).  
99 We present results for SSP1-RCP 2.6 in the main text because this scenario is most in line with  
100 the goals of the Paris Agreement to keep global warming “well below” 2°C<sup>31</sup>. We quantified  
101 model uncertainty in projected climate futures using nine global climate models (GCM) from  
102 the Coupled Model Intercomparison Project Phase 6 (CMIP6). Because many species are un-  
103 likely to be biologically suited for rapid range shifts, and will therefore move slower than the  
104 local velocity of climate change, we constrained the speed of range shifts based on inferred allo-  
105 metric scaling of animal movement<sup>32</sup>, and compared scenarios that assumed limited dispersal  
106 against “full dispersal” (that is, no dispersal limitation).

107 We used projections of newly suitable habitat to identify where novel range overlap among  
108 currently non-overlapping species could happen (hereafter *first encounters*). We then used a  
109 recently-developed viral sharing model to predict the probability of a *novel viral sharing event*—  
110 here defined as the future cross-species transmission of at least one virus species, in this case  
111 between a pair of hosts that are newly in contact—based on novel geographic overlap and host  
112 phylogenetic similarity<sup>18</sup>, a first order approximation of opportunity and compatibility (ED  
113 Figure 2). This model framework has previously provided insights into viral macroecology and  
114 zoonotic risk based on the ~1% of the global mammalian virome that has been described<sup>1,3,18</sup>.  
115 Based on the total number and distribution of first encounters among a subset of 3,139 species  
116 (see “Methods”), we used cumulative viral sharing probabilities to estimate the total number  
117 of novel sharing events that are expected (each of which describes the cross-species transmis-  
118 sion of at least one virus). Using this approach, we tested the hypothesis that environmental  
119 change should alter mammal communities in ways that expose hosts to novel viruses, altering  
120 the structure of the whole mammal-virus network.

## 121 **Climate and land use change will transform the global virome**

122 If species range shifts can keep pace with the velocity of climate change (i.e., can disperse to  
123 all newly suitable locations)<sup>33</sup>, we predict that the vast majority of mammal species will over-  
124 lap with at least one unfamiliar species somewhere in their potential future range, regardless

125 of emissions scenario (mean across GCMs  $\pm$  s.d. here and after; RCP 2.6:  $98.6\% \pm 0.2\%$ ; RCP  
126 8.5:  $96.6\% \pm 0.8\%$ ). At the global level, geographic range shifts would permit over 300,000 first  
127 encounters in every climate scenario (SSP1-RCP 2.6:  $316,426 \pm 1,719$ ; SSP5-RCP 8.5:  $313,973 \pm$   
128  $2,094$ ; ED Figure 3). Compared to a present-day baseline, in which we calculated 345,850 cur-  
129 rent pairwise overlaps among the 3,870 species ( $\sim 7\%$ ), this essentially represents a doubling of  
130 potential species contact. These “first encounters” between mammal species will occur every-  
131 where in the world, but are concentrated in tropical Africa and southeast Asia (ED Figure 4).  
132 This result was counter to expectations that species might aggregate at higher latitudes, given  
133 that most research has focused on poleward range shifts<sup>34,35,36</sup>, and previous work has antici-  
134 pated a link between climate change, range shifts, and parasite host-switching in the Arctic<sup>37,38</sup>.  
135 However, we find that when species shift along latitudinal gradients, they travel in the same  
136 direction as others that are already included in their assemblage, leading to few first encounters.  
137 In contrast, when species track thermal optima along elevational gradients (allowing them to  
138 come from different directions; i.e., mountains force species to cluster), they will aggregate in  
139 the most novel combinations in mountain ranges, especially in tropical areas with the highest  
140 baseline diversity, matching prior predictions<sup>39</sup>. This pattern was robust to climate model un-  
141 certainty (Supplemental Figures 1-9) and to differences in dispersal capacity (e.g., Figure 2C).  
142 The most notable model variation is in the Amazon basin, as well as a small portion of the cen-  
143 tral African basin, Botswana, and parts of the Indian subcontinent (ED Figure 5). These areas  
144 become essentially devoid of first encounters in the most sensitive climate models and warmest  
145 pathways, presumably because all are high-endemism basins of homogenous climate that may  
146 warm too much for species to “escape” into high-elevation refugia (a fairly well-documented  
147 pattern<sup>40,41,42</sup>).

148 This global re-organization of mammal assemblages is projected to dramatically impact the  
149 structure of the mammalian virome. Accounting for geographic opportunity and phylogenetic  
150 compatibility, we project that a total of 316,426 ( $\pm 1,719$ ) first encounters in RCP 2.6 would lead  
151 to 15,311 novel sharing events ( $\pm 140$ )—that is, a minimum of at least  $\sim 15,000$  cross-species  
152 transmission events of at least one novel virus (but potentially many more) between a pair of  
153 naive host species. Assuming that viral sharing will initially be localized to areas of novel host  
154 overlap, we mapped expected viral sharing events, and found again that most sharing should  
155 occur in high-elevation, species-rich ecosystems in Africa and Asia (Figure 1A). If species sur-  
156 vive a changing climate by aggregating in high elevation refugia, this suggests emerging viruses  
157 may be an increasing problem for their conservation<sup>43,44</sup>. Across scenarios, the spatial pattern  
158 of expected sharing events was nearly identical, and was dominated more by the extent of  
159 potential range shifts than by underlying community phylogenetic structure (ED Figure 6; Sup-  
160 plemental Figures 10-18). Though previous work has suggested that the phylogenetic structure  
161 of mammal communities might drive spatial hotspots of pathogen sharing and emergence<sup>45</sup>, in  
162 our framework, opportunity drives spatial patterns more than compatibility. Given that phy-  
163 logeny is a strong determinant of viral sharing in the underlying model, this difference from  
164 previous studies can probably be explained by evolutionary scale, where prior work focused  
165 on primates, and our study includes all mammals. At this broader scale, predicted viral sharing  
166 patterns mostly track total richness (see Figure 3b in<sup>18</sup>), and at finer scales, phylogeny has a  
167 stronger effect (see Extended Data Figure 8 for an example).

## 168 **Dispersal drives bats' disproportionate importance**

169 Species' dispersal capacity is likely to constrain the ability to move to newly suitable locations,  
170 and therefore to limit novel viral sharing. We limited the dispersal potential of flightless species  
171 based on an established allometric scaling with body size, trophic rank, and generation time<sup>32</sup>.  
172 Dispersal limits caused substantial reductions in predicted potential range expansions across  
173 all scenarios, especially for higher warming scenarios, and therefore drove a reduction in first  
174 encounters and novel viral sharing. Even in RCP 2.6 (the scenario with the least warming),  
175 limiting dispersal reduced the number of first encounters by 61% ( $\pm 0.3\%$ ), and reduced the  
176 associated viral sharing events by 70% ( $\pm 0.1\%$ ) to 4,584 ( $\pm 52$ ) projected viral sharing events.  
177 Because trophic position and body size determine dispersal capacity, carnivores account for a  
178 slightly disproportionate number of first encounters, while ungulates and rodents have slightly  
179 fewer first encounters than expected at random (ED Figure 7). Spatial patterns also changed  
180 dramatically when dispersal constraints were added, with the majority of first encounters and  
181 cross-species viral transmission events occurring in southeast Asia (Figure 1B, ED Figures 4,  
182 6). This viral sharing hotspot is driven disproportionately by bats, because their dispersal was  
183 left unconstrained within continents; we made this choice given their exclusion from previous  
184 research characterizing the dispersal capacity of range-shifting mammals<sup>32</sup>, genetic evidence  
185 that flight allows bats—and their viruses—to often circulate at continental levels<sup>46,47</sup>, and data  
186 suggesting that bat distributions are already undergoing disproportionately rapid shifts<sup>48</sup>. Bats  
187 account for nearly 90% of first encounters after constraining dispersal in any climate scenario  
188 (RCP 2.6: 88%  $\pm 0.1\%$ ; RCP 8.5: 89%  $\pm 0.5\%$ ), and dominate the spatial pattern, with most of  
189 their first encounters restricted to southeast Asia (Figure 2).

190 Bats' unique capacity for flight could be an important and previously unconsidered link  
191 between climate-driven range shifts and future changes in the mammal virome. Even non-  
192 migratory bats can regularly travel hundreds of kilometers within a lifetime, far exceeding  
193 what small mammals might be able to cover in 50 years; half of all bat population genetic  
194 studies have failed to find any evidence for isolation by distance<sup>49</sup>. This unique dispersal ca-  
195 pacity has inevitable epidemiological implications, with recent evidence suggesting that conti-  
196 nental panmixia may be common for zoonotic reservoirs, allowing viral circulation at compa-  
197 rable scales<sup>46,47,50</sup>. Several studies have also identified ongoing rapid range expansions in bat  
198 species around the world<sup>48,51,52,53,54,55,56,57,58</sup>, with little mention in the broader climate change  
199 or emerging disease literature. If flight does allow bats to undergo more rapid range shifts  
200 than other mammals, we expect they should drive the majority of novel cross-species viral  
201 transmission, and likely bring zoonotic viruses into new regions. This could add an important  
202 new dimension to ongoing debate about whether bats are unique in their higher viral rich-  
203 ness, higher proportion of zoonotic viruses, or immune adaptations compared to other mam-  
204 mals<sup>3,59,60,61,62,63</sup>.

## 205 **Impacts on zoonotic viruses and human health**

206 The impacts of climate change on mammalian viral sharing patterns are likely to cascade in  
207 future emergence of zoonotic viruses. Among the thousands of expected viral sharing events,

208 some of the highest-risk zoonoses or potential zoonoses are likely to find new hosts. This may  
209 eventually pose a threat to human health: the same general rules for cross-species transmission  
210 explain spillover patterns for emerging zoonoses<sup>64,65</sup>, and the viral species that make successful  
211 jumps across wildlife species have the highest propensity for zoonotic emergence<sup>3,7,28</sup>. Just as  
212 simian immunodeficiency virus making a host jump from monkeys to chimpanzees and gorillas  
213 facilitated the origins of HIV<sup>66</sup>, or SARS-CoV spillover into civets allowed a bat virus to reach  
214 humans<sup>67</sup>, these kinds of wildlife-to-wildlife host jumps may be evolutionary stepping stones  
215 for the ~10,000 potentially zoonotic viruses that are currently circulating in mammal hosts<sup>1</sup>.

216 To illustrate this problem at the scale of a single pathogen's "sharing network" (the set of  
217 all hosts known or suspected to host the virus, and likely to share with those known hosts), we  
218 constructed a sub-network of 13 possible hosts of Zaire ebolavirus (ZEBOV) in Africa, and pro-  
219 jected possible first encounters involving these species (Figure 3A-C, ED Figure 8). We project  
220 these 13 species to encounter 3,695 ( $\pm 49$ ) new mammals in RCP 2.6, with a modest reduction to  
221 2,627 ( $\pm 44$ ) species when accounting for dispersal limitation, and little variation among climate  
222 scenarios (RCP 8.5: 3,529  $\pm$  47 encounters without dispersal limits; 2,455  $\pm$  88 with disper-  
223 sal limits). Even with dispersal limits, these first encounters are predicted to produce almost  
224 one hundred new viral sharing events (RCP 2.6: 96  $\pm$  2; RCP 8.5: 86  $\pm$  4) that might include  
225 ZEBOV, and which cover a much broader part of Africa than the current zoonotic niche of  
226 Ebola<sup>68</sup>. Human spillover risk aside, this could expose several new wildlife species to a deadly  
227 virus historically responsible for sizable primate die-offs<sup>69</sup>. Moreover, for zoonoses like Zaire  
228 ebolavirus without known reservoirs, future host jumps—and therefore, the emergence of a  
229 larger pool of potential reservoirs covering a greater geographic area (e.g., potential introduc-  
230 tion of Zaire ebolavirus to east African mammals)—would only complicate ongoing efforts to  
231 trace the sources of spillover and anticipate future emergence<sup>70,71</sup>. Ebola is far from unique:  
232 with 8,429  $\pm$  228 first encounters in RCP 2.6 between bats and primates, leading to an expected  
233 110  $\pm$  4 new viral sharing events even with dispersal limits (Figure 3D; RCP 8.5: 7,326  $\pm$  667  
234 first encounters, 90  $\pm$  8 sharing events), many potential zoonoses are likely to experience new  
235 evolutionary opportunities because of climate change.

236 Future hotspots of novel mammal assemblages and viral evolution are projected to coin-  
237 cide with areas of high human population density, further increasing vulnerability to potential  
238 zoonoses. Potential first encounters are disproportionately likely to occur in areas that are pro-  
239 jected to be either human settled or used as cropland and less likely to occur in forests (Figure  
240 2E), despite current literature suggesting that forests harbor most emerging and undiscovered  
241 viruses (Figure 4)<sup>27</sup>. This finding is consistent for bats and non-bats, and may be an accident  
242 of geography, but more likely represents the tendency of human settlements to aggregate on  
243 continental edges and around biodiversity hotspots<sup>72</sup>. Regardless of mechanism, we predict  
244 that tropical hotspots of novel viral sharing will broadly coincide with high population density  
245 areas in 2070, especially in the Sahel, the Ethiopian highlands and the Rift Valley, India, east-  
246 ern China, Indonesia, and the Philippines (Figure 4). Some European population centers also  
247 land in these hotspots; recent emergences in this region like Usutu virus<sup>73</sup> highlight that these  
248 populations can still be vulnerable, despite greater surveillance and healthcare access. If range-  
249 shifting mammals create ecological release for undiscovered zoonoses, populations in any of  
250 these areas are likely to be the most vulnerable.

## 251 **Climate change mitigation is insufficient to prevent undesirable outcomes**

252 Whereas most studies agree that climate change mitigation through reducing greenhouse gas  
253 emissions will prevent extinctions and minimize harmful ecosystem impacts<sup>74,75,41,76,77</sup>, our re-  
254 sults suggest that mitigation alone cannot reduce the likelihood of climate-driven viral sharing.  
255 Instead, the mildest scenarios for global warming appear likely to produce at least as much or  
256 even more cross-species viral transmission: when warming is slower, species can successfully  
257 track shifting climate optima, leading to more potential for range expansion, and more first  
258 encounters. Accounting for dispersal limits, species are projected to experience a median po-  
259 tential loss of 0.3% ( $\pm 2.5\%$ ) of their range in RCP 2.6, with 49.8% ( $\pm 3.8\%$ ) experiencing a net  
260 potential increase in range; in contrast, species were predicted to experience a 26.2% ( $\pm 13.2\%$ )  
261 median potential loss in RCP 8.5, and only 30.8% ( $\pm 5.45\%$ ) potentially gained any range (ED  
262 Figure 3A). In fact, in RCP 8.5, we projected that 261 ( $\pm 76$ ) species could lose their entire range,  
263 with 162 ( $\pm 53$ ) attributable to dispersal limits alone. As a result, there were 5.4% ( $\pm 1.7\%$ ) fewer  
264 potential first encounters in RCP 8.5 compared to RCP 2.6, and unexpectedly, a 1.9% ( $\pm 0.3\%$ )  
265 predicted reduction in the connectivity of the future global viral sharing network (ED Figure  
266 3B,D). Overall, our results indicate that a mild perturbation of the climate system could create  
267 thousands of new opportunities for viruses to find new hosts. Finally, in a supplemental anal-  
268 ysis comparing the present climate to the near past (see Methods and ED Figure 9), we found  
269 that if species are already tracking shifting habitats, present-day Africa and the Amazon might  
270 already be hotspots of novel cross-species viral transmission, given the warming that has taken  
271 place over the last 25 years ( $\sim +1^\circ\text{C}$ ).

272 We caution that this set of results should not be interpreted as a justification for inaction,  
273 or as a possible upside to unmitigated warming, which will be accompanied by mass defau-  
274 nation, devastating disease emergence, and unprecedented levels of human displacement and  
275 global instability<sup>41,74,75,76,77,78,79</sup>. Rather, our results highlight the urgency of better wildlife  
276 disease surveillance systems and public health infrastructure as a form of climate change adap-  
277 tation, even if mitigation efforts are successful and global warming stays below  $+2^\circ\text{C}$  above  
278 pre-industrial levels.

## 279 **Conclusions**

280 Our study establishes a macroecological link between climate change and cross-species viral  
281 transmission. The patterns we describe are likely further complicated by uncertainties in the  
282 species distribution modeling process, including local adaptation or plasticity in response to  
283 changing climates, or lack of landscape connectivity preventing dispersal. The projections we  
284 make are also likely to be complicated by several ecological factors, including the temperature  
285 sensitivity of viral host jumps<sup>80</sup>; potential independence of vector or non-mammal reservoir  
286 range shifts; the possibility that defaunation especially at low elevations might interact with  
287 disease prevalence through biodiversity dilution and amplification effects not captured by our  
288 models<sup>81</sup>; or temporal heterogeneity in exposure (hosts might exchange viruses in passing but  
289 not overlap by 2070, especially in warmer scenarios). Future work can expand the scope of our  
290 findings to other host-parasite systems; our approach, which combines viral sharing models



291 with species distribution modeling approaches for thousands of species, is readily applied to  
292 other datasets. Birds have the best documented virome after mammals, and account for the  
293 majority of non-mammalian reservoirs of zoonotic viruses<sup>63</sup>; changing bird migration patterns  
294 in a warming world may be especially important targets for prediction. Similarly, with am-  
295 phibians facing disproportionately high extinction rates due to a global fungal panzootic, and  
296 emerging threats like ranavirus causing conservation concern, pathogen exchange among am-  
297 phibians may be especially important for conservation practitioners to understand<sup>82</sup>. Finally,  
298 marine mammals are an important target given their exclusion here, especially after a recent  
299 study implicating reduced Arctic sea ice in novel viral transmission between pinnipeds and sea  
300 otters—a result that may be the first proof of concept for our proposed climate-disease link<sup>83</sup>.

301 Our study provides the first template for how surveillance could target *future* hotspots of  
302 viral emergence in wildlife. In the next decade alone, it may cost at least a billion dollars  
303 to comprehensively identify and counteract zoonotic threats before they spread from wildlife  
304 reservoirs into human populations<sup>2</sup>. These efforts are being undertaken during the greatest pe-  
305 riod of global ecological change recorded in human history, and in a practical sense, the rapid  
306 movement of species (and their virome) poses an unexpected challenge for virological research.  
307 While several studies have addressed how range shifts in zoonotic reservoirs might expose hu-  
308 mans to novel viruses, few have considered the fact that most new exposures will be among  
309 wildlife species. The relevance of this process is reinforced by the COVID-19 pandemic, which  
310 began only weeks after the completion of this study; the progenitor of SARS-CoV-2 likely orig-  
311 inated in southeast Asian horseshoe bats (*Rhinolophus* sp.), and may have spread to humans  
312 through an as-yet-unknown bridge host<sup>84,85,86</sup>. While we caution against overinterpreting our  
313 results as explanatory of the current pandemic or indicative of future pandemic risk—which is  
314 largely the product of global health governance, capacity, and preparedness—we note that the  
315 global reassortment of mammalian viruses will undoubtedly have a downstream impact on hu-  
316 man health (though attribution to climate change will be difficult in any individual case). Track-  
317 ing spillover into humans is paramount, but so is monitoring of viral transmission in wildlife.  
318 Targeting surveillance in future hotspots of cross-species transmission like southeast Asia, and  
319 developing norms of open data sharing for the global scientific community, will help researchers  
320 identify host jumps early on, ultimately improving our ability to respond to potential threats.

## 321 **Methods**

322 In this study, we develop global maps for terrestrial mammals characterizing their habitat use  
323 and their ecological niche as a function of climate. We project these into paired climate-land  
324 use futures for 2070, with dispersal limitations set by biological constraints for each species.  
325 For a final subset of 3,139 species, we predict the probability of viral sharing among species  
326 pairs using a model of the mammalian viral sharing network that is trained on phylogenetic  
327 relatedness and current geographic range overlaps. With that model, we map the projected  
328 hotspots of new viral sharing in different futures. Analysis and visualization code is available  
329 on a Github repository ([github.com/cjcarlson/iceberg](https://github.com/cjcarlson/iceberg)).

## 330 **Data**

### 331 **Mammal virus data**

332 Our understanding of viral sharing patterns is based on a dataset previously published by Oli-  
333 val *et al.*<sup>87</sup>. The dataset describes 2,805 known associations between 754 species of mammalian  
334 host and 586 species of virus, scraped from the taxonomic data stored in the International Com-  
335 mittee on Taxonomy of Viruses (ICTV) database. These data have previously been used in  
336 several studies modeling global viral diversity in wildlife<sup>1,84,88</sup>, including a previous study that  
337 developed the model of viral sharing we use here<sup>18</sup>. As that model is reproduced exactly in  
338 our study, we have made no further modifications to the data, and more detailed information  
339 on data management (e.g., the exclusion of *Homo sapiens* from that analysis) can be found in the  
340 Albery *et al.* publication<sup>18</sup>.

### 341 **Biodiversity data**

342 We downloaded Global Biodiversity Informatics Facility (GBIF: [gbif.org](https://gbif.org)) occurrence records for  
343 all mammals based on taxonomic names resolved by the IUCN Red List. We developed species  
344 distribution models for all 3,870 species with at least three unique terrestrial presence records  
345 at a 0.25 degree spatial resolution (approximately 25km by 25 km at the equator). In order to  
346 focus on species occurrence, we retained one unique point per 0.25 degree grid cell. This spatial  
347 resolution was chosen to match the available resolution of land use change projections (see  
348 below). Spatial and environmental outliers were removed based on Grubb outlier tests<sup>89</sup>. To  
349 implement the Grubb outlier tests for a given species we defined a distance matrix between each  
350 record and the centroid of all records (in both environmental or geographic space, respectively)  
351 and determined whether the record with the largest distance was an outlier with respect to all  
352 other distances, at a given statistical significance ( $p = 1e - 3$ , in order to exclude only extreme  
353 outliers). If an outlier was detected it was removed and the test was repeated until no additional  
354 outliers were detected.

### 355 **Climate and land use data**

356 Climate and land use data were compiled from WorldClim 2<sup>90</sup> and the Land Use Harmoniza-  
357 tion 2 (LUH2) project<sup>91</sup> respectively, for both baseline conditions (operationalized as 1970-2000

358 for the climate data, 2015 for land use, and 2020 for dispersal limits; see “The effect of recent  
359 warming” for an interrogation of the difference between climate baselines and actual present-  
360 day climate) and a half-century in the future (operationalized as 2061-2080 for climate, 2070 for  
361 land use, and 2070 for dispersal).

362 The WorldClim dataset is widely used in ecology, biodiversity, and agricultural projections  
363 of potential climate change impacts. WorldClim makes data available for current and future  
364 climates in the form of 19 pre-processed bioclimatic variables (Bioclim: BIO1-19). In order to  
365 reduce collinearity among climate variables in the species distribution models, we selected five  
366 Bioclim variables from the full set of 19 Bioclim variables: mean annual temperature (BIO1),  
367 temperature seasonality (BIO4), annual precipitation (BIO12), precipitation seasonality (coeffi-  
368 cient of variation; BIO15), and precipitation of the driest quarter (BIO17). This is the largest set  
369 of Bioclim variables possible that keeps their correlation over a global extent suitably low ( $r <$   
370  $0.7$ ). The Bioclim variables for the historical climate are the mean from 1970-2000, and those for  
371 the future climate are the mean from 2060-2080.

372 To account for model uncertainty in climate projections, we used projections for future cli-  
373 mates from all nine global climate models (GCMs) currently available on WorldClim 2 and par-  
374 ticipating in the Coupled Model Intercomparison Project 6 (CMIP6), the most recent generation  
375 of climate models: BCC-CSM2-MR, CNRM-CM6-1, CNRM-ESM2-1, CanESM5, GFDL-ESM4,  
376 IPSL-CM6A-LR, MIROC-ES2L, MIROC6, and MRI-ESM2-0. These nine GCMs encompass a  
377 wide range of effective climate sensitivities from 2.6K (MIROC6) to 5.6K (CanESM5) compared  
378 with a range of 1.8-5.6K across 27 CMIP6 models and 2.1-4.7K for CMIP5<sup>92</sup>. Temperature and  
379 precipitation for future climates have been downscaled and bias-corrected by WorldClim 2 us-  
380 ing a change factor approach. The multi-year average of the GCM output for minimum tem-  
381 perature, maximum temperature and total precipitation is calculated for each month of the  
382 simulated historical and future period, and the absolute (for temperature) or proportional (for  
383 precipitation) difference in these values is then calculated, resulting in climate anomalies which  
384 are then applied to the 10-minute spatial resolution observed historical dataset<sup>90,93</sup>. WorldClim  
385 2 then calculates Bioclim variables based on these downscaled and bias-corrected data. This  
386 approach makes the assumption that the change in climate is relatively stable across space (that  
387 is, has high spatial autocorrelation). We downloaded the five pre-processed Bioclim variables  
388 for all nine GCMs at 10 minutes spatial resolution from WorldClim 2<sup>90</sup>, and aggregated with  
389 bilinear interpolation to 0.25 degree spatial resolution (approximately 25km at the equator) to  
390 match with the LUH2 land use data resolution.

391 Historical land-use data for 2015 and projected land-use data for 2070 were obtained from  
392 the Land Use Harmonization 2 (LUH2) project at 0.25 degree spatial resolution<sup>94,91</sup>. The LUH2  
393 data reconstructs and projects changes in land use among twelve categories: primary forest,  
394 non-forested primary land, potentially forested secondary land, potentially non-forested sec-  
395 ondary land, managed pasture, rangeland, cropland (four types), and urban land. To capture  
396 species’ habitat preferences, we downloaded data for all 3,870 mammal species from the IUCN  
397 Habitat Classification Scheme (version 3.1) and mapped the 104 unique IUCN habitat classifi-  
398 cations onto the twelve land use types present in the LUH2 dataset following Powers *et al.*<sup>95</sup>  
399 (Supplementary Table 1).

400 Finally, we downloaded global population projections from the SEDAC Global 1-km Down-

401 scaled Population Base Year and Projection Grids Based on the SSPs version 1.0<sup>96</sup>, and selected  
402 the year 2070 for RCP 2.6 (see “Climate and land use futures”). These data are downscaled to  
403 1km from a previous dataset at 7.5 arcminute resolution<sup>97</sup>. We aggregated 1 km grids up to 0.25  
404 degree grids for compatibility with other layers, again using bilinear interpolation.

#### 405 **Additional data**

406 A handful of smaller datasets were incidentally used throughout the study. These included the  
407 IUCN Red List, which was used to obtain species taxonomy, range maps, and habitat prefer-  
408 ences<sup>98</sup>; the US Geological Survey Global Multi-resolution Terrain Elevation Data 2010 dataset,  
409 which was used to derive a gridded elevation in meters at ~25km resolution; and a literature-  
410 derived list of suspected hosts of Ebola virus<sup>30</sup>.

#### 411 **Mapping species distributions**

412 We developed species distribution models for a total of 3,870 species in this study, divided into  
413 two modeling pipelines based on data availability (ED Figures 10, 11).

#### 414 **Poisson point process models**

415 For 3,088 species with at least 10 unique presence records, Poisson point process models (PPMs),  
416 a method closely related to maximum entropy species distribution models (MaxEnt), were fit  
417 using regularized downweighted Poisson regression<sup>99</sup> with 20,000 background points, using  
418 the R package `glmnet`<sup>100,101,100</sup>. The spatial domain of predictions was chosen based on the  
419 continent(s) where a species occurred in their IUCN range map; as a final error check, species  
420 ranges were constrained to a 1,000 km buffer around their IUCN ranges. We trained species  
421 distribution models on current climate data using the WorldClim 2 data set<sup>90</sup>, using the five  
422 previously-specified Bioclim variables.

423 To reduce the possibility of overfitting patterns due to spatial aggregation, we used spatially  
424 stratified cross validation. Folds were assigned by clustering records based on their coordinates  
425 and splitting the resulting dendrogram into 25 groups. These groups were then randomly as-  
426 signed to five folds. (If species had fewer than 25 records, a smaller number of groups was  
427 used based on sample size, and these were split into five folds.) This flexible approach accounts  
428 for variation in the spatial scale of of aggregation among species by using the cluster analysis.  
429 By splitting into 25 groups initially (rather than 5) we obtain better environmental coverage (at  
430 least on average) within a fold and minimize the need to extrapolate for withheld predictions.

431 Linear (all species), quadratic (species with >100 records), and product (species with >200  
432 records) features were used. Positive coefficients of quadratic features are not allowed (i.e. all  
433 have an upper bound of 0 in the model-fitting process), to avoid the undesirable effect of in-  
434 creasing suitability predictions at range edges. The regularization parameter was determined  
435 based on 5-fold cross-validation with each fold, choosing a value 1 standard deviation below  
436 the minimum deviance<sup>102</sup>. This resulted in five models per species which were then combined  
437 in an unweighted ensemble. Continuous predictions of the ensemble were converted to bi-

438 nary presence/absence predictions by choosing a threshold based on the 5th percentile of the  
439 ensemble predictions at training presence locations.

440 When models were projected into the future, we limited extrapolation to 1 standard devi-  
441 ation beyond the data range of presence locations for each predictor. This decision balances a  
442 small amount of extrapolation based on patterns in a species niche with limiting the influence of  
443 monotonically increasing marginal responses, which can lead to statistically unsupported (and  
444 likely biologically unrealistic) responses to climate.

#### 445 **Range bagging models**

446 For an additional 783 rare species (3 to 9 unique points on the 25 km grid), we produced species  
447 distribution models with a simpler range bagging algorithm, a stochastic hull-based method  
448 that can estimate climate niches from an ensemble of underfit models<sup>103,104</sup>, and is therefore  
449 well suited for smaller datasets. From the full collection of presence observations and environ-  
450 mental variables range-bagging proceeds by randomly sampling a subset of presences (propor-  
451 tion  $p$ ) and a subset of environmental variables ( $d$ ). From these, a convex hull around the subset  
452 of points is generated in environmental space. The hull is then projected onto the landscape  
453 with a location considered part of the species range if its environmental conditions fall within  
454 the estimate hull. The subsampling is replicated  $N$  times, generating  $N$  ‘votes’ for each cell on  
455 the landscape. One can then choose a threshold for the number of votes required to consider  
456 the cell as part of the species’ range to generate the binary map used in our downstream anal-  
457 yses. Based on general guidelines in<sup>103</sup> we chose  $p = 0.33$ ,  $d = 2$ , and  $N = 100$ . We then  
458 chose the voting threshold to be 0.165 ( $=0.33/2$ ) because this implies that the cell is part of the  
459 range at least half the time for each subsample. Upon visual inspection, this generally lead to  
460 predictions that were very conservative about inferring that unsampled locations were part of a  
461 species distribution. The same environmental predictors and ecoregion-based domain selection  
462 rules were used for range bagging models as were used for the point process models discussed  
463 above. This hull-based approach is particularly valuable for poorly sampled species which may  
464 suffer from sampling bias because bias within niche limits has little effect on range estimates.

#### 465 **Model validation and limitations**

466 PPM models performed well, with a mean test AUC under 5 fold cross-validation (using spatial  
467 clustering to reduce inflation) of 0.78 (s.d. 0.14). The mean partial AUC evaluated over a range  
468 of sensitivity relevant for SDM (0.8-0.95) was 0.81 (s.d. 0.09). The mean sensitivity of binary  
469 maps used to assess range overlap (based on the 5% training threshold used to make a binary  
470 map) was 0.90 (s.d. 0.08). Range bagging models were difficult to meaningfully evaluate be-  
471 cause they were based on extremely small sample sizes (3-9). The mean training AUC (we did  
472 not perform cross-validation due to small sample size) was 0.96 (s.d. 0.09). The binary maps  
473 had perfect sensitivity (1) because the threshold used to make them was chosen sufficiently low  
474 to include the handful of known presences for each species. One way to assess how well we  
475 inferred the range for these species is to quantify how much of the range was estimated based  
476 on our models, based on the number of (10km) cells predicted to be part of the species range  
477 even when it was not observed there. The mean number of cells inferred to contain a presence

478 was 254 (s.d. 503); however, the distribution is highly right skewed with a median of 90. This  
479 indicates that the range bagging models were typically relatively conservative about inferring  
480 ranges for poorly sampled species.

481 Although our models performed well, we note that researchers should approach the inter-  
482 pretation of species distribution models (SDMs) with a certain degree of caution. Even ad-  
483 hering to best practices, many SDM methods are sensitive to subjective user-end choices that  
484 influence model performance, transferrability, and interpretability. Some of those choices may  
485 have marginally affected the patterns we document in this study. For example, to quantify  
486 our results' resilience to the choice of threshold, we constructed pairwise overlaps for the cur-  
487 rent rasters of all species across three habitat suitability thresholds (1%, 5%, and 10%). We did  
488 this using the climate projections, the IUCN-clipped climate projections, and the land use- and  
489 IUCN-clipped projections (see below sections), such that there were nine total replicates, only  
490 one of which (IUCN- and land use-clipped 5% threshold) was used in our main analyses. We  
491 fitted the proportional overlap between each species pair across all nine replicates in a linear  
492 mixed model with the identity of the species pair and the thresholding replicate as random ef-  
493 fects, to quantify the variance associated with the choice of processing pipeline compared to  
494 the variance associated with the species pair itself. We also examined the mean proportional  
495 overlap across the nine replicates. Our linear mixed model examining the variance associated  
496 with thresholding pipeline found that thresholding accounted for only 2.2% of the variance in  
497 proportional overlap, in contrast to the 72.3% accounted for by the identity of the species pair.  
498 Furthermore, there was very little difference observed in the mean proportional overlap and the  
499 number of overlapping species across thresholds. These results demonstrate that the choice of  
500 thresholding had an impact on the results of our analysis, but an extremely marginal one, and  
501 we expect similar results would be found for other choices like variable set reduction, model  
502 calibration, the resolution of predictor data, and the processing of point occurrence data.

503 Finally, we note that while many factors besides climate are ignored by our models, such  
504 as biotic interactions or animal social behavior, our models are tailored to our aim: predicting  
505 hotspots of elevated risk under climate change. In our application, correctly predicting pres-  
506 ences is more important than incorrect prediction of absences, because we are focused on the  
507 potential for novel species overlap. We cannot say whether that overlap *will* happen, based on  
508 the multiple factors besides climate that influence distributions and range shifts, but we can say  
509 with confidence - based on robust current niche estimates, validated with spatially stratified  
510 cross-validation, and biologically-grounded estimates of dispersal capacity - where risk would  
511 be elevated in accordance with our simulations.

## 512 **Habitat range and land use**

513 To capture species' habitat preference, we collated data for all 3,870 mammal species from the  
514 IUCN Habitat Classification Scheme (version 3.1). We then mapped 104 unique IUCN habitat  
515 classifications onto the twelve land use types present in the LUH2 dataset. For 962 species,  
516 no habitat data was available, or no correspondence existed between a land type in the IUCN  
517 scheme and our land use data; for these species, land use filters were not used. Filtering based  
518 on habitat was done as permissively as possible: species were allowed in current and potential

519 future ranges to exist in a pixel if any non-zero percent was assigned a suitable habitat type;  
520 almost all pixels contain multiple habitats. In some scenarios, human settlements cover at least  
521 some of a pixel for most of the world, allowing synanthropic species to persist throughout most  
522 of their climatically-suitable range. For those with habitat data, the average reduction in range  
523 from habitat filtering was 7.6% of pixels.

## 524 **Predicting future species distributions**

525 We modeled a total of 136 future scenarios, produced by the four paired climate-land use change  
526 pathways replicated across nine global climate models (with one, GFDL-ESM4, only available  
527 for two climate scenarios: RCP 2.6 and RCP 7.0; see below), modified by two optional filters on  
528 species ranges (habitat preferences and dispersal limits). The full matrix of possible scenarios  
529 captures a combination of scenario uncertainty about global change and epistemological uncer-  
530 tainty about how best to predict species' range shifts. By filtering potential future distributions  
531 based on climate, land use, and dispersal constraints, we aimed to maximize realism; our pre-  
532 dictions were congruent with extensive prior literature on climate- and land use-driven range  
533 loss<sup>105,106,95</sup>.

## 534 **Climate and land use futures**

535 We considered four possible scenarios for the year 2070 each based on a pairing of the Rep-  
536 resentative Concentration Pathways (RCPs) and the Shared Socioeconomic Pathways (SSPs).  
537 RCP numbers (e.g., 2.6 or 4.5) represent Watts per square meter of additional radiative forcing  
538 by the end of the century, while SSPs describe alternate possible pathways of socioeconomic de-  
539 velopment and demographic change. As pairs, SSP-RCP scenarios describe alternative futures  
540 for global socioeconomic and environmental change. Not all SSP-RCP scenario combinations in  
541 the "scenario matrix" are realistically possible<sup>107</sup>. For example, in the vast majority of integra-  
542 tive assessment models, decarbonization cannot be achieved fast enough in the SSP5 scenario  
543 to achieve RCP 2.6.

544 We used four SSP-RCP combinations: SSP1-RCP2.6, SSP2-RCP4.5, SSP3-RCP7.0, and SSP5-  
545 RCP8.5. We selected these four scenarios because they span a wide range of plausible global  
546 change futures, and serve as the basis for climate model projections in the Scenario Model In-  
547 tercomparison Project for the newest generation of global climate models (CMIP6)<sup>31</sup>. SSP1-  
548 RCP2.6 is a scenario with low population growth, strong greenhouse gas mitigation and land  
549 use change (especially an increase in global forest cover), which makes global warming likely  
550 less than 2°C above pre-industrial levels by 2100; SSP2-RCP4.5 has moderate land use change  
551 and greenhouse gas mitigation with global warming of around 2.5°C by 2100; SSP3-RCP7.0  
552 has high population growth, substantial land use change (especially a decrease in global forest  
553 cover) and very weak greenhouse gas mitigation efforts with global warming of around 4°C by  
554 2100; and SSP5-RCP8.5 is the highest warming scenario with less decrease in forest cover than  
555 SSP3 but more substantial increases in coal and other fossil fuel usage leading to more than 4°C  
556 warming by 2100<sup>31,108,109,110</sup>.

## 557 **Climate model uncertainty**

558 To identify the contribution of climate model uncertainty and its propagation through our anal-  
559 ysis, we used all nine selected GCMs from CMIP6 and produced multi-model averages for all  
560 main text figures. For all of the main text statistics, we present each multi-model mean with a  
561 standard deviation across the nine global climate models. We also compared the first encounters  
562 from the two models with the highest (CanESM5) and lowest (MIROC6) effective climate sensi-  
563 tivity in the available CMIP6 set on WorldClim (ED Figure 5)<sup>92</sup>. We also present the map of first  
564 encounters and novel viral sharing in each GCM run for each RCP, accounting for both climate  
565 and land use change, with the full dispersal and limited dispersal scenario, in Supplementary  
566 Figures 1-18.

## 567 **Limiting dispersal capacity**

568 Not all species can disperse to all environments, and not all species have equal dispersal capacity—  
569 in ways likely to covary with viral sharing properties. We follow a rule proposed by Schloss *et*  
570 *al.*<sup>32</sup>, who described an approximate formula for mammal range shift capacity based on body  
571 mass and trophic position. For carnivores, the maximum distance traveled in a generation is  
572 given as  $D = 40.7M^{0.81}$ , where  $D$  is distance in kilometers and  $M$  is body mass in kilograms.  
573 For herbivores and omnivores, the maximum is estimated as  $D = 3.31M^{0.65}$ .

574 We used mammalian diet data from the EltonTraits database<sup>111</sup>, and used the same cutoff as  
575 Schloss to identify carnivores as any species with 10% or less plants in their diet. We used body  
576 mass data from EltonTraits in the Schloss formula to estimate maximum generational dispersal,  
577 and converted estimates to annual maximum dispersal rates by dividing by generation length,  
578 as previously estimated by another comprehensive mammal dataset<sup>112</sup>. We multiply by 50  
579 years (from 2020 as the present to 2070) and use the resulting distance as a buffer around the  
580 original range map, and constrain possible range shifts within that buffer. For 420 species with  
581 missing data in one of the required sources, we interpolated dispersal distance based on the  
582 closest relative in our supertree with a dispersal velocity estimate.

583 Qualified by the downsides of assuming full dispersal<sup>113</sup>, we excluded bats from the as-  
584 sumed scaling of dispersal limitations. The original study by Schloss *et al.*<sup>32</sup> chose to omit bats  
585 entirely, and subsequent work has not proposed any alternative formula. Moreover, the Schloss  
586 formula performs notably poorly for bats: for example, it would assign the largest bat in our  
587 study, the Indian flying fox (*Pteropus giganteus*), a dispersal capacity lower than that of the gray  
588 dwarf hamster (*Cricetulus migratorius*). Bats were instead given full dispersal in all scenarios:  
589 given significant evidence that some bat species regularly cover continental distances<sup>46,47</sup>, and  
590 that isolation by distance is uncommon within many bats' ranges<sup>49</sup>, we felt this was a defensible  
591 assumption for modeling purposes. Moving forward, the rapid range shifts already observed  
592 in many bat species (see main text) could provide an empirical reference point to fit a new allo-  
593 metric scaling curve (after standardizing those results for the studies' many different method-  
594 ologies). A different set of functional traits likely govern the scaling of bat dispersal, chiefly the  
595 aspect ratio (length:width) of wings, which is a strong predictor of population genetic differ-  
596 entiation<sup>49</sup>. Migratory status would also be important to include as a predictor although here,  
597 we exclude information on long-distance migration for all species (due to a lack of any real



598 framework for adding that information to species distribution models in the literature).

## 599 **Explaining spatial patterns**

600 To explore the geography of novel assemblages, we used linear models that predicted the num-  
601 ber of first encounters (novel overlap of species pairs) at the 25km level ( $N = 258,539$  grid  
602 cells). Explanatory variables included: richness (number of species inhabiting the grid cell in  
603 our predicted current ranges for the given scenario); elevation in meters (derived from the US  
604 Geological Survey Global Multi-resolution Terrain Elevation Data 2010 dataset); and the pre-  
605 dominant land cover type for the grid cell. We simplified the classification scheme for land use  
606 types into five categories for these models (human settlement, cropland, rangeland and pas-  
607 ture, forest, and unforested wildland), and assigned pixels a single land use type based on the  
608 maximum probability from the land use scenarios. We fit a model for each scenario and pair of  
609 biological assumptions; because of the large effect bats had on the overall pattern, we retrained  
610 these models on subsets of encounters with and without a bat species involved. To help model  
611 fitting, we  $\log(x+1)$ -transformed the response variable (number of overlaps in the pixel) and  
612 both continuous explanatory variables (meters of elevation above the lowest point and species  
613 richness). Because some elevation values were lower than 0 (i.e., below sea level), we treated  
614 elevation as meters above the lowest terrestrial point rather than meters above sea level to allow  
615 us to log-transform the data.

## 616 **Viral sharing models**

### 617 **Criteria for species' inclusion**

618 Of the 3,870 species for which we generated distribution models, 103 were aquatic mammals  
619 (cetaceans, sirenians, pinnipeds, and sea otters), and 382 were not present in the mammalian  
620 supertree that we used for phylogenetic data<sup>114</sup>. These species, and the associated species dis-  
621 tribution models, were excluded from the analysis. Aquatic species were removed using a  
622 two-filter approach, by first cross-referencing with Pantheria<sup>115</sup>, and second by checking no  
623 species only had non-aquatic habitat use types (see "Habitat range and land use"). We also ex-  
624 cluded 246 monotremes and marsupials because the shape of the supertree prevented us from  
625 fitting satisfactory GAMM smooths to the phylogeny effect, leaving 3,139 non-marine placental  
626 mammals with associated phylogenetic data.

### 627 **Generalized additive mixed models**

628 We used a previously-published model of the phylogeography of viral sharing patterns to make  
629 predictions of future viral sharing<sup>18</sup>. This model was based on an analysis of 510 viruses shared  
630 between 682 mammal species<sup>3</sup>, and predicted the probability that a pair of mammal species will  
631 share a virus given their geographic range overlap and phylogenetic relatedness. The original  
632 study uncovered strong, nonlinear effects of spatial overlap and phylogenetic similarity in de-  
633 termining viral sharing probability, and simulating the unobserved global network using these  
634 effect estimates capitulated multiple macroecological patterns of viral sharing.

635 In the original study, a Generalized Additive Mixed Model (GAMM) was used to predict  
636 virus sharing as a binary variable, based on (1) geographic range overlap; (2) phylogenetic  
637 similarity; and (3) species identity as a multi-membership random effect. The phylogeographic  
638 explanatory variables were obtained from two broadly available, low-resolution data sources:  
639 pairwise phylogenetic similarity was derived from a mammalian supertree previously modified  
640 for host-pathogen studies<sup>114,3</sup>, with similarity defined as the inverse of the cumulative branch  
641 length between two species, scaled to between 0 and 1. Geographic overlap was defined as  
642 the area of overlap between two species' IUCN range maps, divided by their cumulative range  
643 size<sup>116</sup>.

644 We first retrained the GAMMs from<sup>18</sup> on the pairwise overlap matrix of species distribution  
645 models generated for this study, so that present predictions would be comparable with potential  
646 future distributions. Of the 3,139 species in our reduced dataset, 544 had viral records in our  
647 viral sharing dataset and shared with at least one other mammal, and were used to retrain the  
648 GAMM from<sup>18</sup>. To check the performance of the GAMM, we predicted sharing patterns with  
649 a) only random effects, b) only fixed effects, and c) with both. To extend predictions to the  
650 the full set of mammals, we generated random effects for out-of-sample species by drawing  
651 from the fitted distribution of species-level effects. (Predicting without these random effects  
652 underestimates species variance, resulting in mean sharing of 0.02 rather than the observed  
653 0.06). The mean sharing value across these predictions closely approximated observed sharing  
654 probability ( $\sim 0.06$ ).

655 We note that this model uses citation counts to correct for sampling bias, an imperfect  
656 method but one that leads to strong validation performance on an independently-compiled  
657 dataset of host-virus associations, which carries a different set of biases. However, it is still  
658 possible that sampling bias in host-virus datasets like the Olival *et al.* dataset could artificially  
659 inflate the signal of phylogeography in viral sharing, if researchers investigating a noteworthy  
660 viral detection then preferentially sample closely-related host species in the immediate area. It  
661 is unlikely these effects would bias our results in a particular direction, but accounting for these  
662 biases should at least involve some acknowledgement that cross-species transmission is chal-  
663 lenging to predict. (See the Albery *et al.* study's Discussion for a more in-depth treatment of  
664 sampling bias effects.)

### 665 **Model validation and limits**

666 Compared to the current viral sharing matrix, the model performs well with only fixed effects  
667 (AUC = 0.80) and extremely well with both fixed and random effects (AUC = 0.93). The model  
668 explained a very similar proportion of the deviance in viral sharing to that in Albery *et al.*<sup>18</sup>  
669 (44.5% and 44.8%, respectively).

670 In practice, several unpredictable but confounding factors could affect the reliability of this  
671 model as a forecasting tool, including temperature sensitivity of viral evolution in host jumps<sup>80</sup>,  
672 or increased susceptibility of animals with poorer health in lower-quality habitat or unfavorable  
673 climates. Moreover, once viruses can produce an infection, their ability to transmit *within* a new  
674 species is an evolutionary race between mutation and recombination rates in viral genomes,  
675 host innate and adaptive immunity, virulence-related mortality, and legacy constraints of co-

676 evolution with prior hosts and vectors<sup>64,65</sup>. But data cataloging these precise factors are hardly  
677 comprehensive for the hundreds of zoonotic viruses, let alone for the thousands of undescribed  
678 viruses in wildlife. Moreover, horizontal transmission is not necessary for spillover potential to  
679 be considered significant; for example, viruses like rabies or West Nile virus are not transmitted  
680 within human populations but humans are still noteworthy hosts.

### 681 **Mapping opportunities for sharing**

682 We used the GAMM effect estimates to predict viral sharing patterns across the 3,139 mammals  
683 with associated geographic range and phylogenetic data, for both the present and future sce-  
684 narios. By comparing current and future sharing probabilities for each of the four global change  
685 scenarios, we estimated which geographic and taxonomic patterns of viral sharing would likely  
686 emerge. We separately examined patterns of richness, patterns of sharing probability, and their  
687 change (i.e., future sharing probability - current sharing probability, giving the expected proba-  
688 bility of a novel sharing event).

689 A subset of the mammals in our dataset were predicted to encounter each other for the first  
690 time during range shifts. For each of these pairwise first encounters, we extracted the area of  
691 overlap in every future scenario, and assigned each overlap a probability of sharing from the  
692 mean GAMM predictions and mapped the mean and cumulative probability of a new sharing  
693 event happening in a given geographic pixel.

### 694 **Case study on Zaire ebolavirus**

695 For a case study in possible significant cross-species transmission, we compiled a list of known  
696 hosts of Zaire ebolavirus (ZEBOV), a zoonosis with potentially high host breadth that has been  
697 known to cause wildlife die-offs, but has no known definitive reservoir. Hosts were taken  
698 from two sources: the training dataset on host-virus associations<sup>3</sup>, and an additional dataset  
699 of filovirus testing in bats<sup>30</sup>. In the latter case, any bats that have been reported antibody pos-  
700 itive or PCR-positive for ZEBOV were included. A total of 19 current “known hosts” were  
701 selected. We restricted our analysis to the 13 hosts from Africa, because there is no conclusive  
702 evidence that Zaire ebolavirus actively circulates outside Africa; although some bat species out-  
703 side Africa have tested positive for antibodies to ZEBOV, this is likely due to cross-reactivity  
704 with other undiscovered filoviruses<sup>117,118,30</sup>. We used the 13 African hosts to predict possible  
705 first encounters in all scenarios (ED Figure 8), and mapped the current richness of ZEBOV hosts,  
706 the change in host richness by 2070, and the number of first encounters (Figure 3).

### 707 **Overlap with human populations**

708 To examine the possibility that hotspots of cross-species transmission would overlap with hu-  
709 man populations, we used SEDAC’s global population projections version 1.0 for the year  
710 2070<sup>96</sup>. We aggregated these to native resolution, for each of the four SSP paired with the native  
711 RCP/SSP pairing for the species distribution models. In Figure 4 we present the population  
712 projections for SSP1, which pairs with RCP 2.6.

## 713 **The effect of recent warming**

714 Like many studies that employ species distribution modeling, our study uses a definition of  
715 the “present” that embodies a slight cognitive dissonance with recent warming<sup>119</sup>. The World-  
716 Clim2 dataset captures the mean climate between 1970 and 2000, but the climate at the time  
717 of writing has already warmed substantially compared to this baseline. While we employ this  
718 loose definition of “present day” throughout, we note that the actual present climate is substan-  
719 tially warmer, and therefore might be expected to already be experiencing the turnover in viral  
720 sharing that we describe throughout.

721 As a final supplementary analysis, we interrogated the effect of recent climate change on the  
722 world we live in today, which is already substantially warmer than pre-industrial temperatures.  
723 To do so, we repeated the analysis in its entirety – minus steps constraining species ranges  
724 with either the IUCN range maps or dispersal limits – using the ERA5 reanalysis product with  
725 monthly averaged data<sup>120</sup>. We trained species distribution models based on a recent climate  
726 baseline (1981-1995), and projected their ranges to the present day (2005-2019), using two time  
727 slices (1991 and 2015) positioned equally in the climate intervals. We set dispersal limits for  
728 species as we did in the main analysis, but for this 25-year period.

729 Using these data to repeat the analysis, we found that there were a projected total of 52,463  
730 first encounters (with 34,254 including at least one bat species), amounting to a total of 1,043  
731 viral sharing events. First encounters and viral sharing events were located mostly in Africa and  
732 the Amazon (ED Figure 9). We caution that these results—particularly the number of encounters  
733 and sharing events—should not be interpreted as the same “units” as the main analysis, given  
734 that they are calibrated to an entirely different climate reconstruction.

## 735 **Acknowledgements**

736 This paper is the culmination of several years of idea development and owes special thanks  
737 to many people, including the entire Bansal Lab, Laura Ward Alexander, Kevin Burgio, Eric  
738 Dougherty, Romain Garnier, Wayne Getz, Peta Hitchens, Christine Johnson, and Isabel Ott.  
739 We especially thank Laura Alexander for sharing bat filovirus testing sources used to compile  
740 the Ebola sub-network. Thanks are also extended to José Hidasi-Neto for publicly-available  
741 data visualization code. CJC was supported by the Georgetown Environment Initiative and the  
742 National Socio-Environmental Synthesis Center (SESYNC) under funding received from the  
743 National Science Foundation DBI-1639145. CJC, GFA, and EAE were supported by funding to  
744 the Verena Consortium including NSF BII 2021909 and a grant from Institut de Valorisation des  
745 Données (IVADO). CM acknowledges funding from National Science Foundation grant DBI-  
746 1913673. EAE, KJO, and NR were supported by the United States Agency for International  
747 Development (USAID) Emerging Pandemic Threats PREDICT project.

## 748 **Author Contributions**

749 CJC and GFA conceived the study. CM, CJC, and CHT developed species distribution mod-  
750 els; GFA, EAE, KJO, and NR developed the generalized additive models. GFA, CJC, and CMZ  
751 integrated the predictions of species distributions and viral sharing patterns and designed vi-  
752 sualizations. All authors contributed to the writing of the manuscript.

753

## Figures

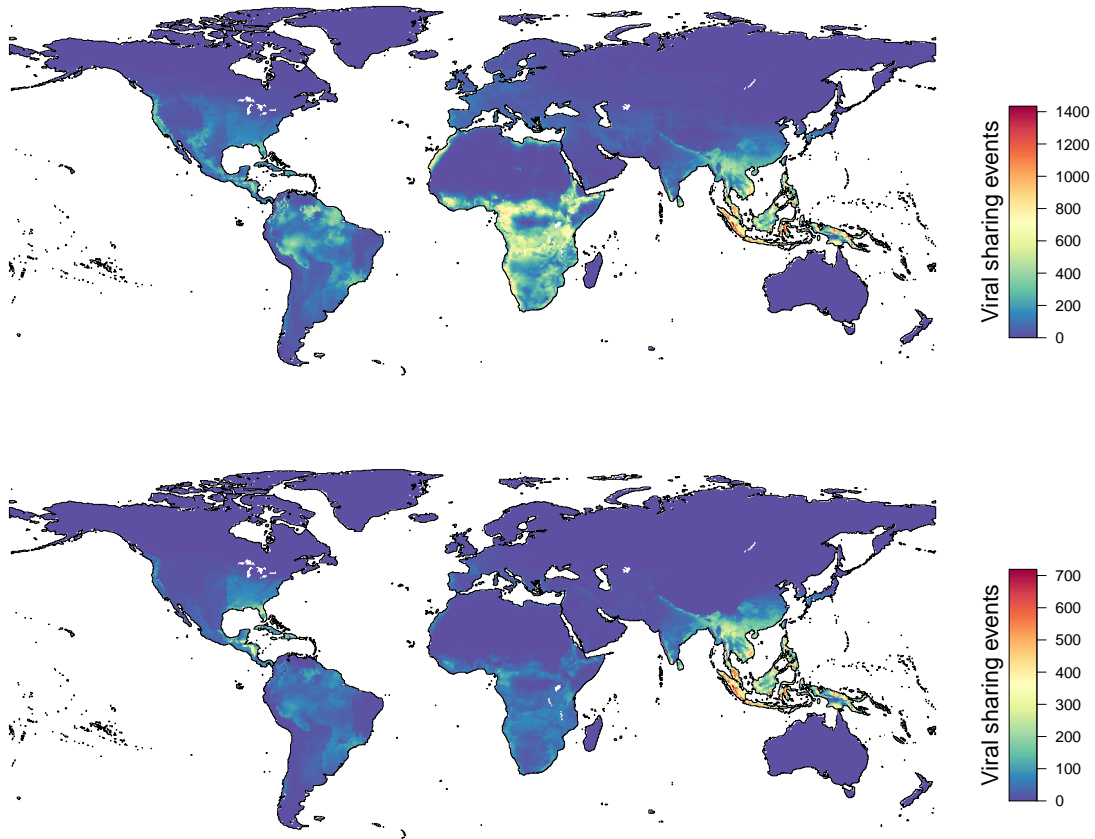

Figure 1: **Climate change will drive novel viral sharing among mammal species.** The projected number of novel viral sharing events among mammal species in 2070 based on host species geographic range shifts from climate and land use change (SSP1-RCP 2.6), without dispersal limits (A) and with dispersal limitation (B). Results are averaged across nine global climate models.

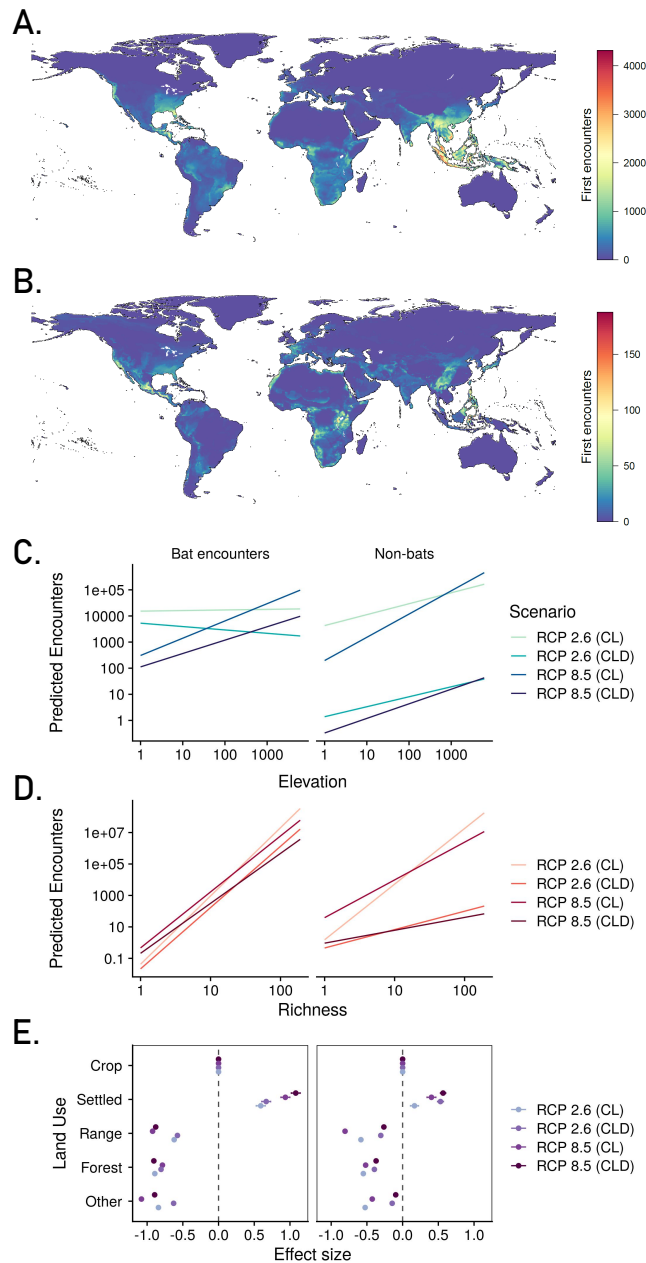

**Figure 2: Bats disproportionately drive future novel viral sharing.** The spatial pattern of first encounters (in SSP1-RCP 2.6) differs among range-shifting mammal pairs including bat-bat and bat-nonbat encounters (A) and only encounters among non-bats (B). Using a linear model, we show that elevation (C), species richness (D), and land use (E) influence the number of new overlaps for bats and non-bats across scenarios (RCPs paired with SSPs as described in Methods). Slopes for the elevation effect were generally steeply positive: a  $\log_{10}$ -increase in elevation was associated with between a 0.4-1.41  $\log_{10}$ -increase in first encounters. Results are averaged across nine global climate models. Legends refer to scenarios: CL gives climate and land use change, while CLD adds dispersal limits.

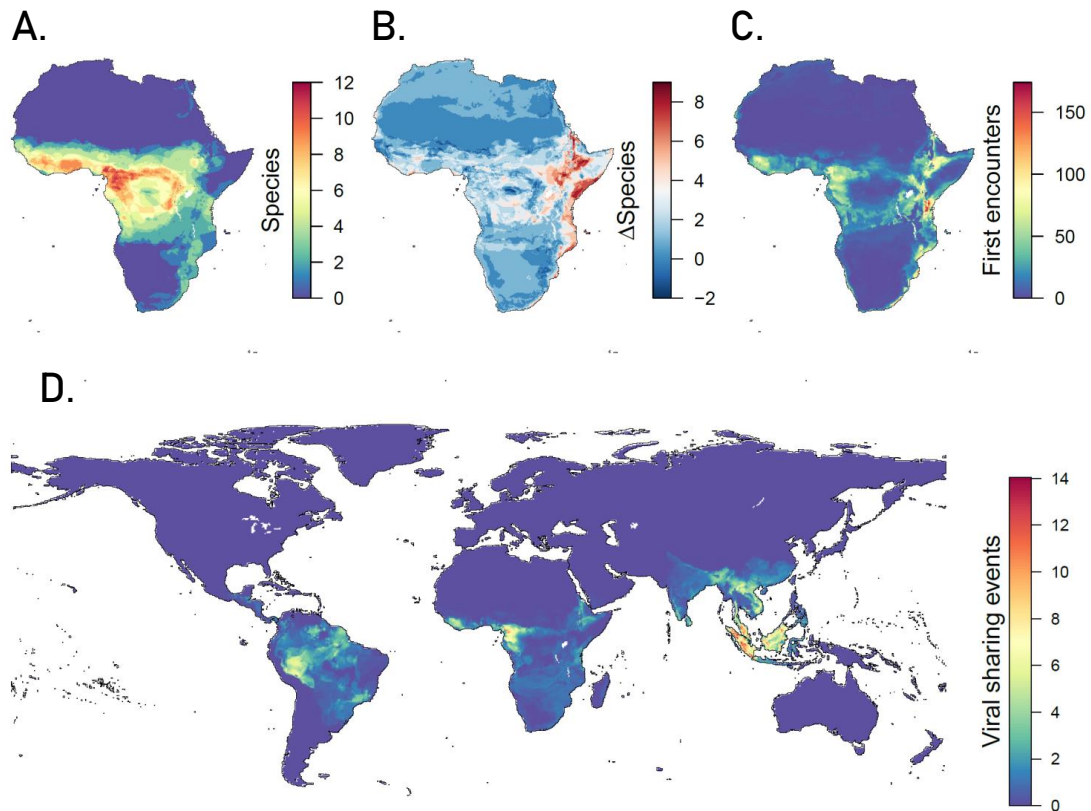

**Figure 3: Range expansions will expose naive hosts to zoonotic reservoirs.** (A) The predicted distribution of known African hosts of Zaire ebolavirus. (B) The change in richness of these hosts as a result of range shifts (SSP1-RCP 2.6). (C) Projected first encounters with non-Ebola hosts. (D) Bat-primate first encounters are projected to occur globally, producing novel sharing events. Results are averaged across nine global climate models.



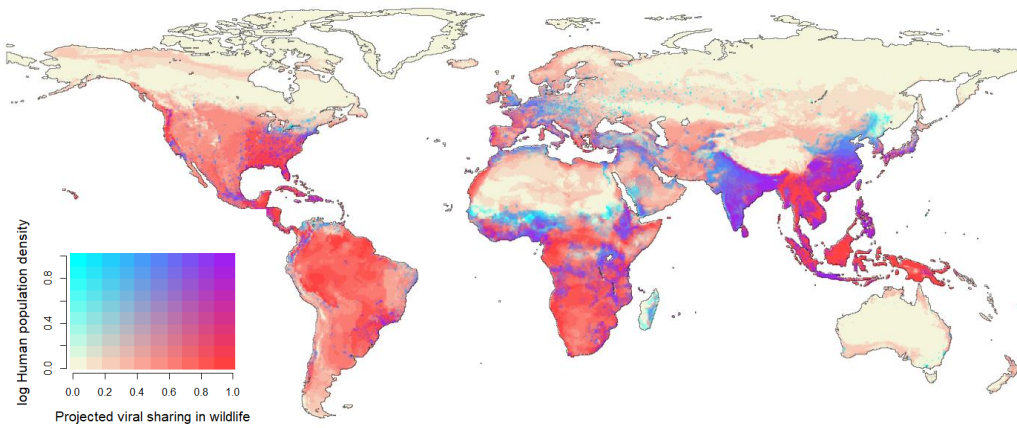

**Figure 4: Novel viral sharing events coincide with human population centers.** In 2070 (SSP1-RCP 2.6; climate only), human population centers in equatorial Africa, south China, India, and southeast Asia will overlap with projected hotspots of cross-species viral transmission in wildlife. (Both variables are linearly rescaled to 0 to 1.) Results are averaged across nine global climate models.

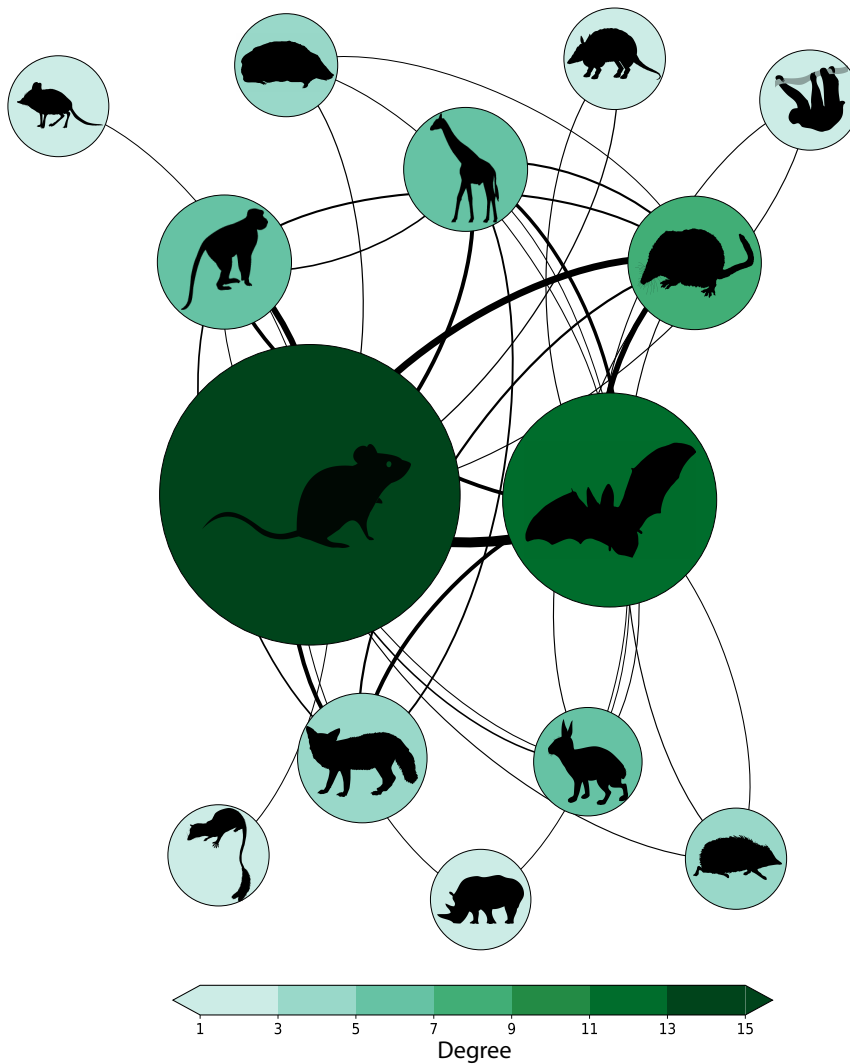

Extended Data Figure 1: **The mammal-virus network.** The present-day viral sharing network by mammal order inferred from modeled pairwise predictions of viral sharing probabilities. Edge width denotes the expected number of shared viruses (the sum of pairwise species-species viral sharing probabilities), with most sharing existing among the most speciose and closely-related groups. Edges shown in the network are the top 25% of links. Nodes are sized by total number of species in that order in the host-virus association dataset, color is scaled by degree.

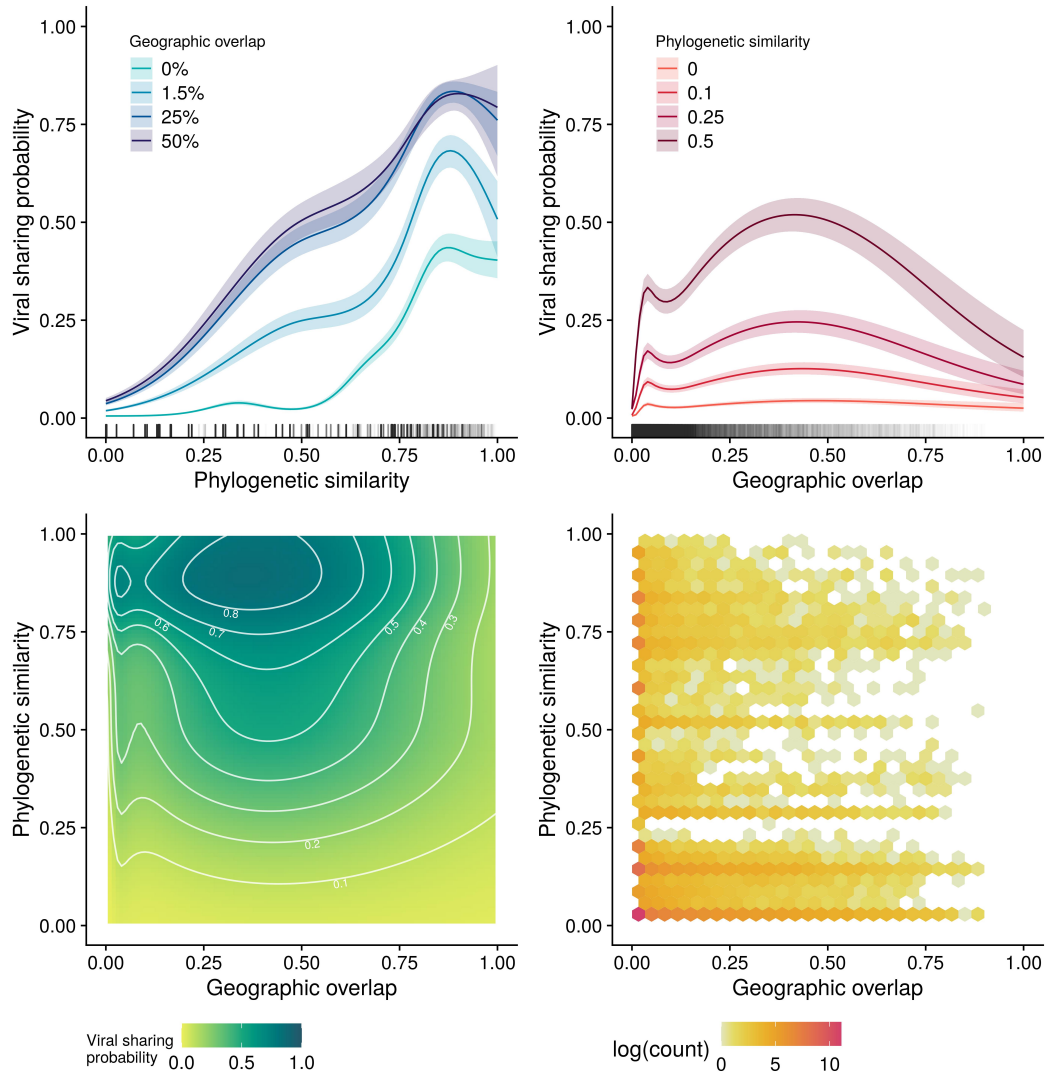

Extended Data Figure 2: **Predicted phylogeographic structure of viral sharing.** Phylogeographic prediction of viral sharing using a generalized additive mixed model. Viral sharing increases as a function of phylogenetic similarity (A) and geographic overlap (B), which have strong nonlinear interactions, shown in the contour map of joint effects (C). White contour lines denote 10% increments of sharing probability. Declines at high values of overlap may be an artefact of model structure and low sampling in the upper levels of geographic overlap, shown in a hexagonal bin chart of the raw data distribution (D).

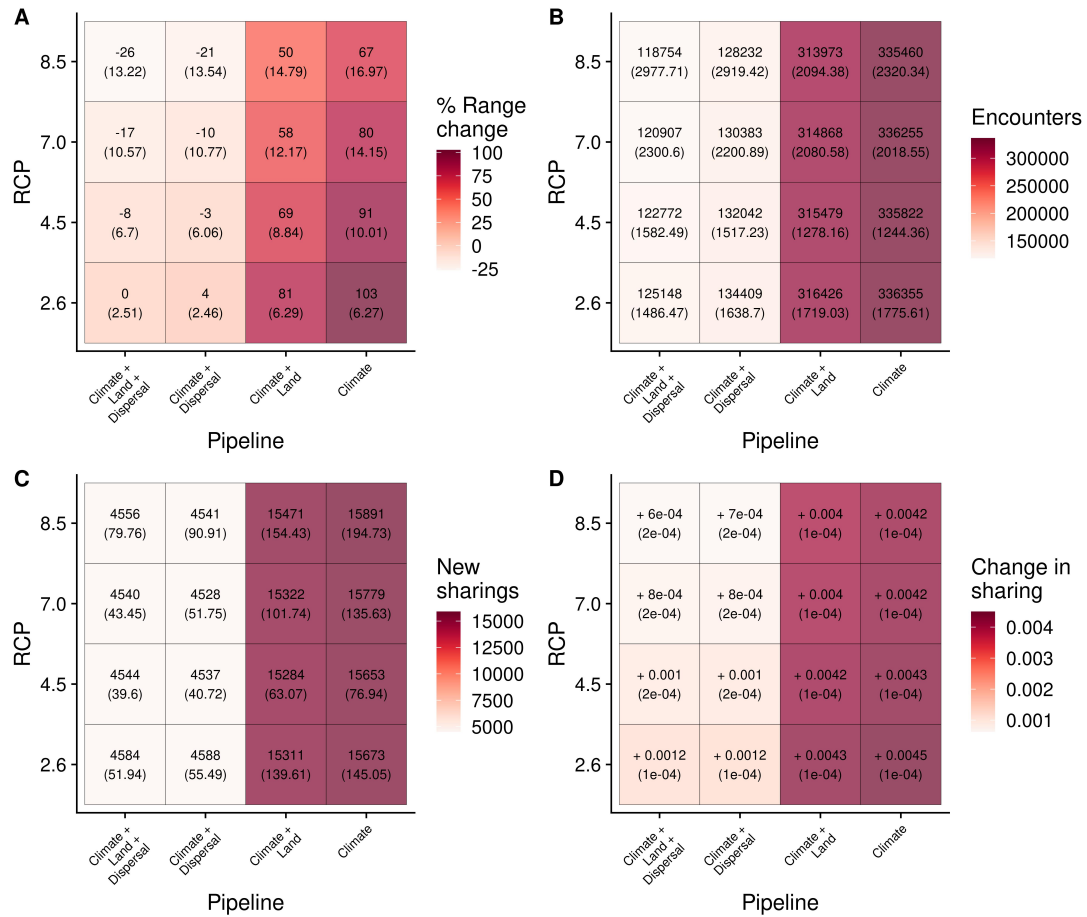

Extended Data Figure 3: **Outcomes by model formulation and climate change scenario.** Heatmaps displaying predicted changes across model formulations. (A) Range expansions were highest in non-dispersal-limited scenarios and in scenarios with lower levels of global warming. (B) The number of predicted first encounters was higher in non-dispersal-limited scenarios and in scenarios with lower levels of global warming. (C) The number of expected new viral sharing events was higher in non-dispersal-limited scenarios and in more severe RCPs. (D) The overall change in sharing probability (connectance) across the viral sharing network between the present day and the future scenarios; absolute change is minimal but positive across all scenarios, being greatest in non-dispersal-limited scenarios and in scenarios with lower levels of global warming. Results are averaged across nine global climate models, with standard deviation indicated in parentheses underneath main statistics.

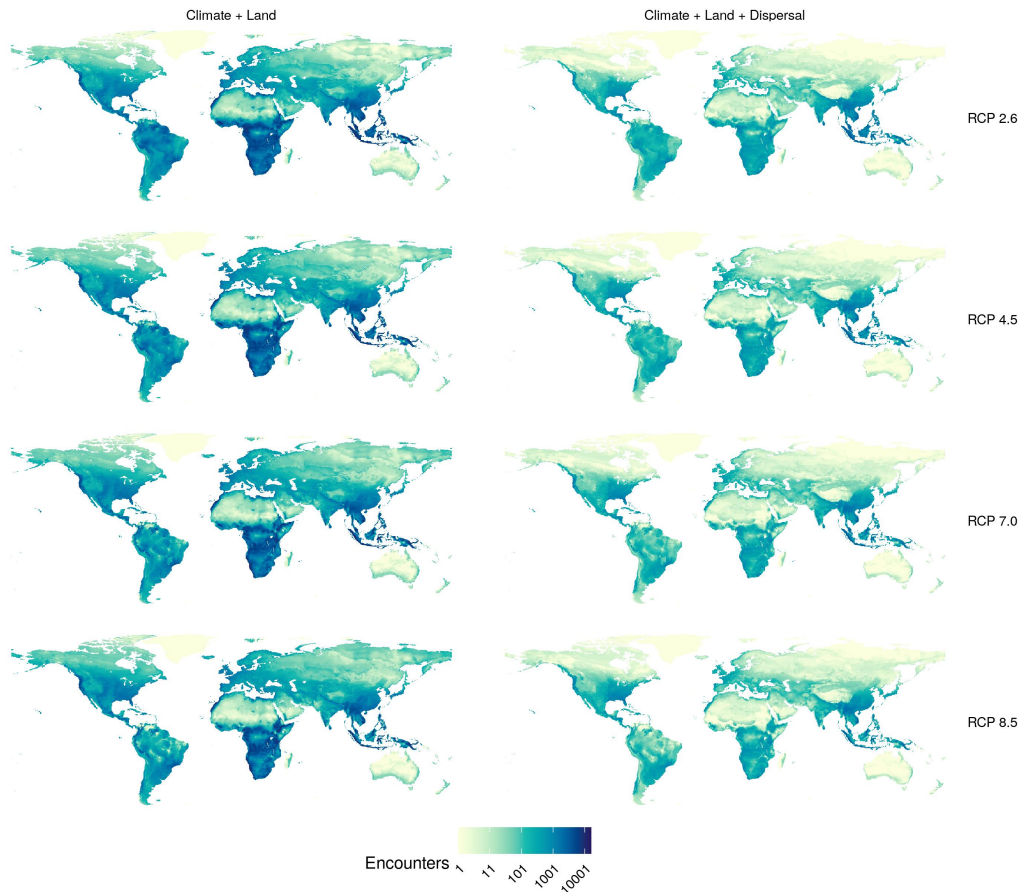

Extended Data Figure 4: **Geographic distribution of first encounters.** Predictions were carried out for four representative concentration pathways (RCPs), accounting for climate change and land use change, without (left) and with dispersal limits (right). Darker colours correspond to greater numbers of first encounters in the pixel. Results are averaged across nine global climate models.

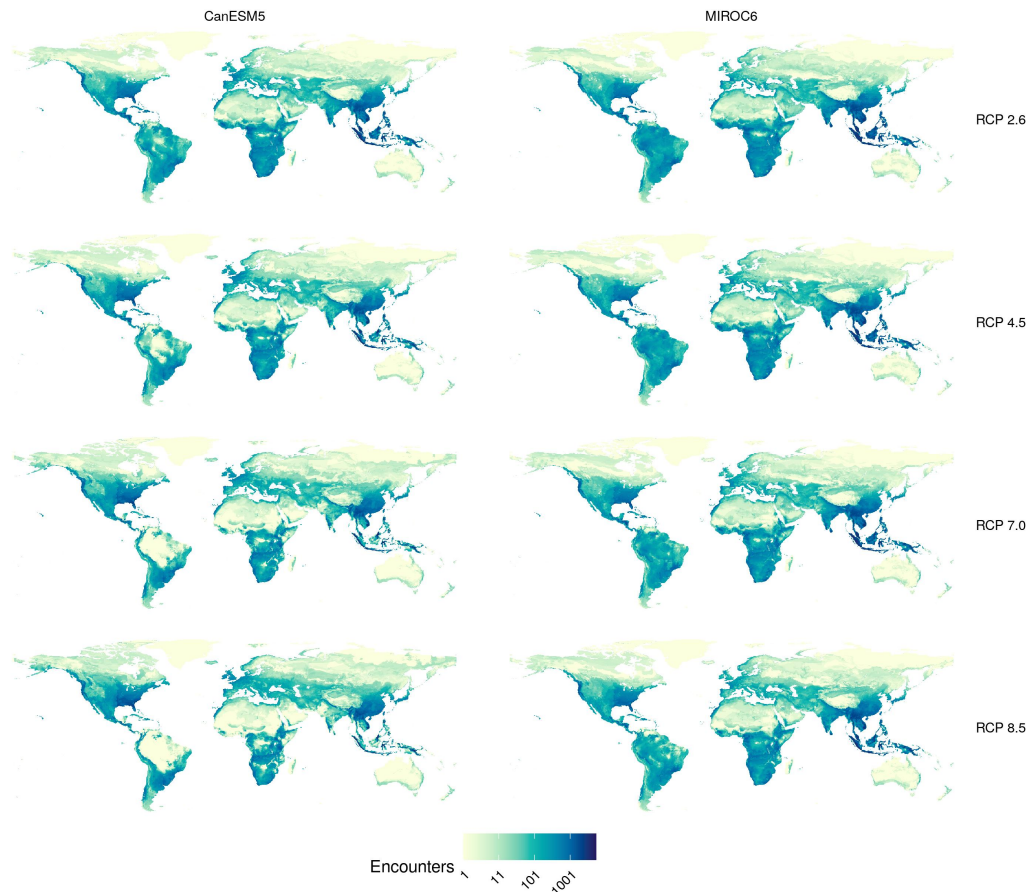

Extended Data Figure 5: **Geographic distribution of first encounters in two global climate models.** Predictions were carried out for four representative concentration pathways (RCPs), accounting for climate change and land use change through pairing with shared socioeconomic pathways (SSPs) as detailed in the Methods. The two models selected are those with the highest (CanESM5) and lowest (MIROC6) effective climate sensitivity in the available CMIP6 set on WorldClim<sup>92</sup>. Darker colours correspond to greater numbers of first encounters in the pixel.

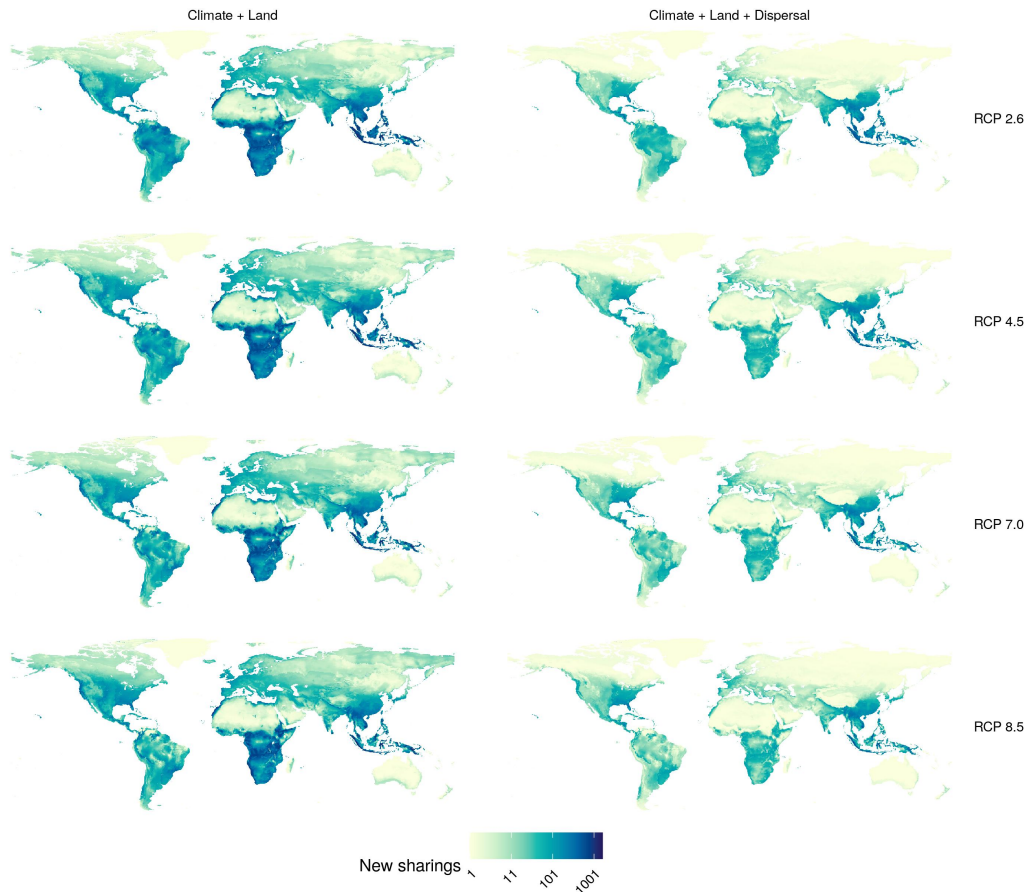

Extended Data Figure 6: **Geographic distribution of expected viral sharing events from first encounters.** Predictions were carried out for potential future distributions for four representative concentration pathways (RCPs), accounting for climate change and land use change, without (left) and with dispersal limits (right). Darker colours correspond to greater numbers of new viral sharing events in the pixel. Probability of new viral sharing was calculated by subtracting the species pair's present sharing probability from their future sharing probability that our viral sharing GAMMs predicted. This probability was projected across the species pair's range intersection, and then summed across all novel species pairs in each pixel. Results are averaged across nine global climate models.

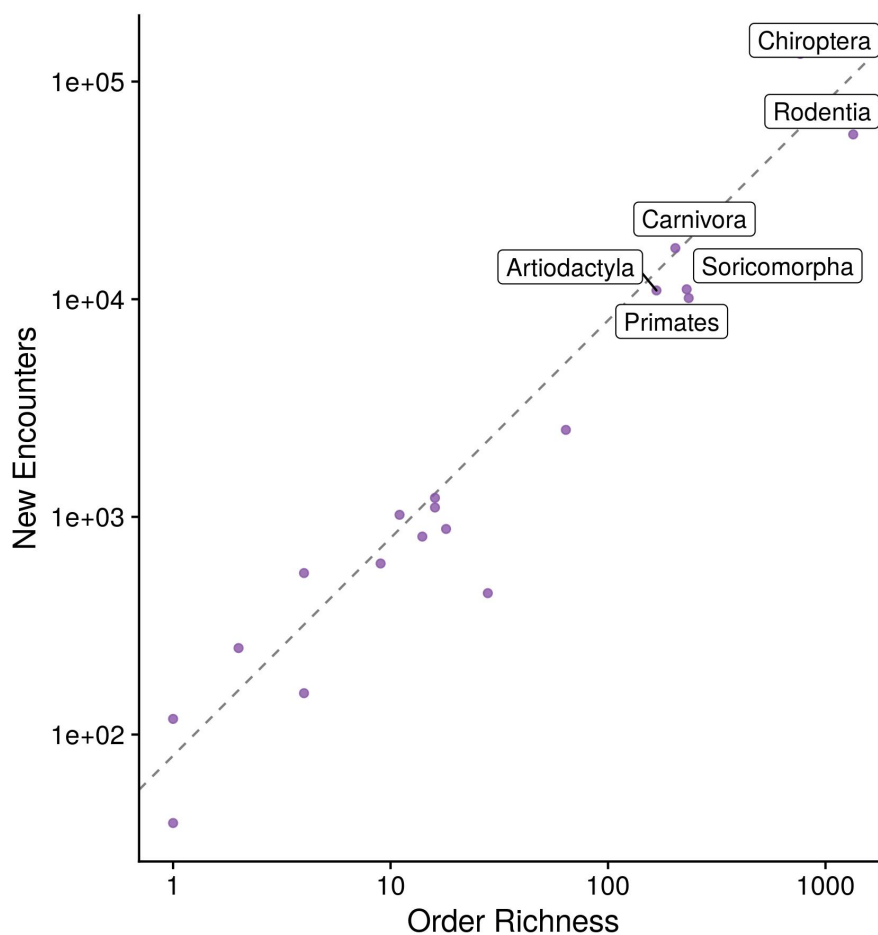

Extended Data Figure 7: **Order-level heterogeneity in first encounters.** Dispersal stratifies the number of first encounters (RCP 2.6 with all range filters), where some orders have more than expected at random, based on the mean number of first encounters and order size (line). Results are averaged across nine global climate models.



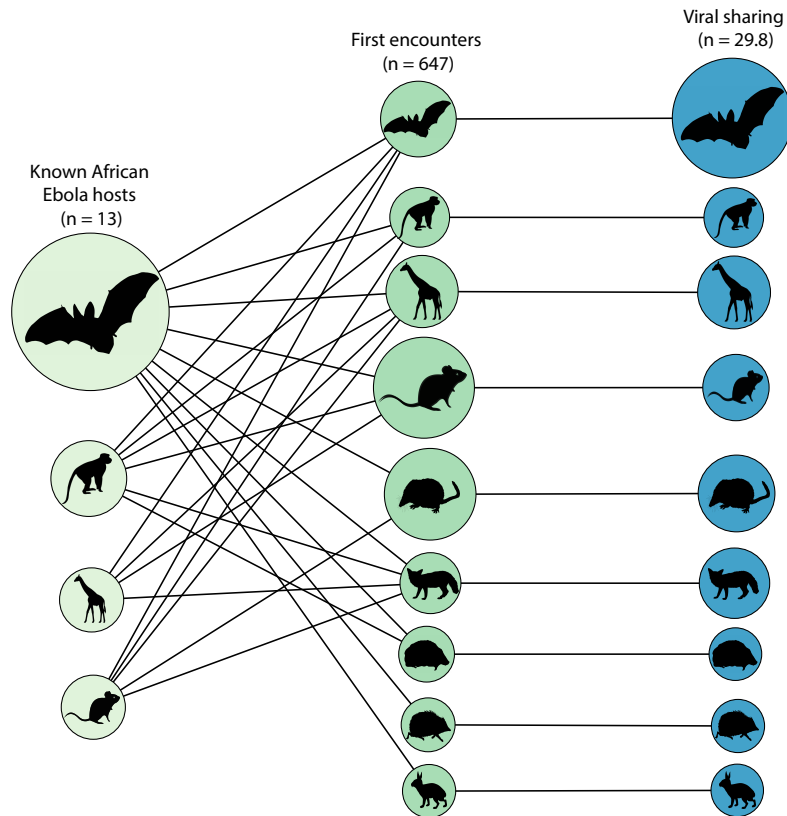

Extended Data Figure 8: **Projected viral sharing from suspected Ebola reservoirs is dominated by bats.** Node size is proportional to (left) the number of suspected Ebola host species in each order, which connect to (middle) first encounters with potentially naive host species; and (right) the number of projected viral sharing events in each receiving group. (Node size denotes proportions out of 100% within each column total.) While Ebola hosts will encounter a much wider taxonomic range of mammal groups than current reservoirs, the vast majority of future viral sharing will occur disproportionately in bats.

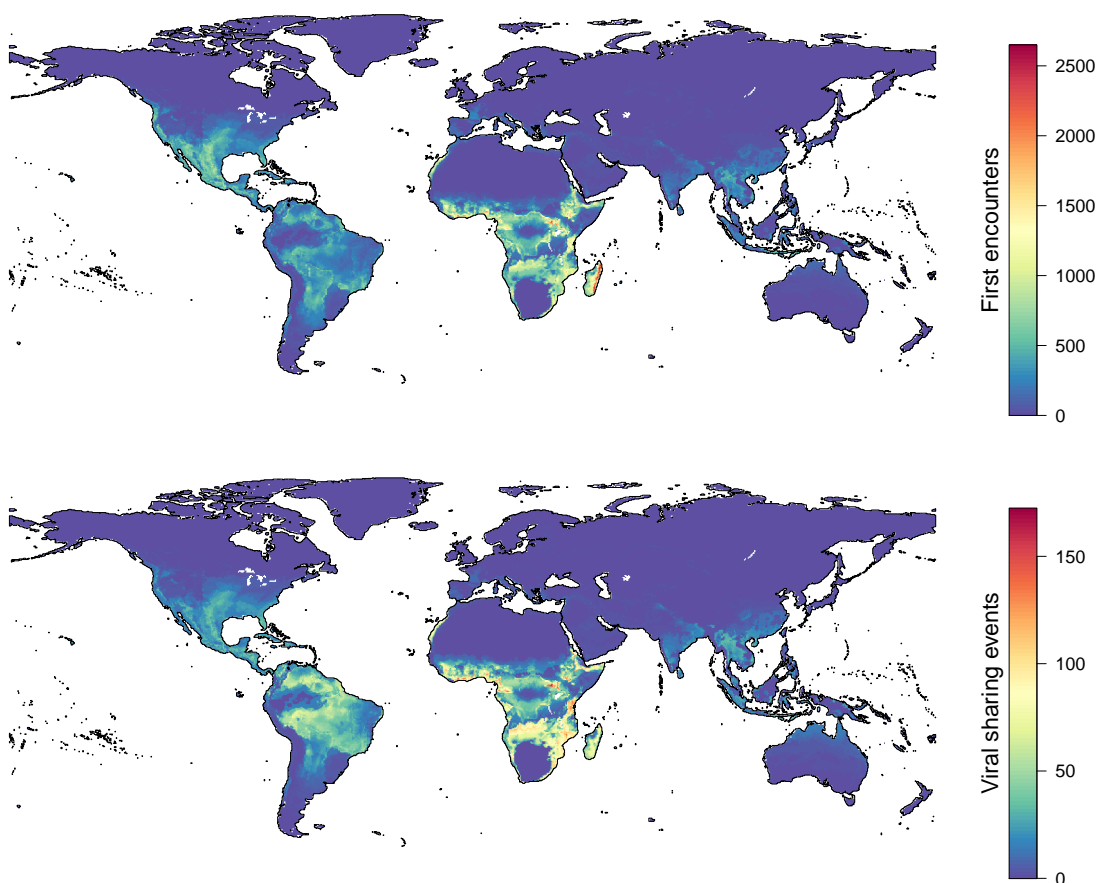

Extended Data Figure 9: **Projected viral sharing from present-day warming.** First encounters and viral sharing events are derived from an independent analysis of ERA5 climate data for the present day (2005-2019) versus the recent past (1981-1995).

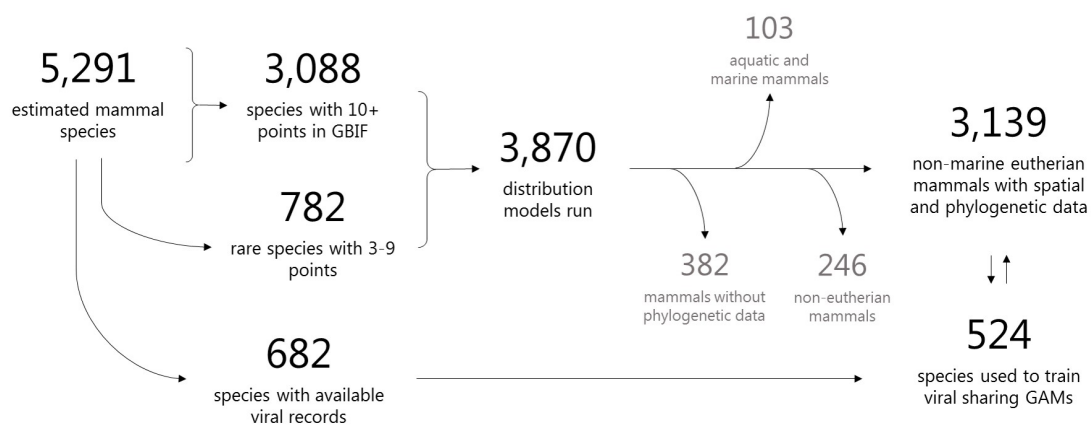

Extended Data Figure 10: **Data processing workflow.** Summary of species inclusion across the modeling pipeline for species distributions and viral sharing models. The final analyses in the main text use 3,139 species of placental mammals across all scenarios.

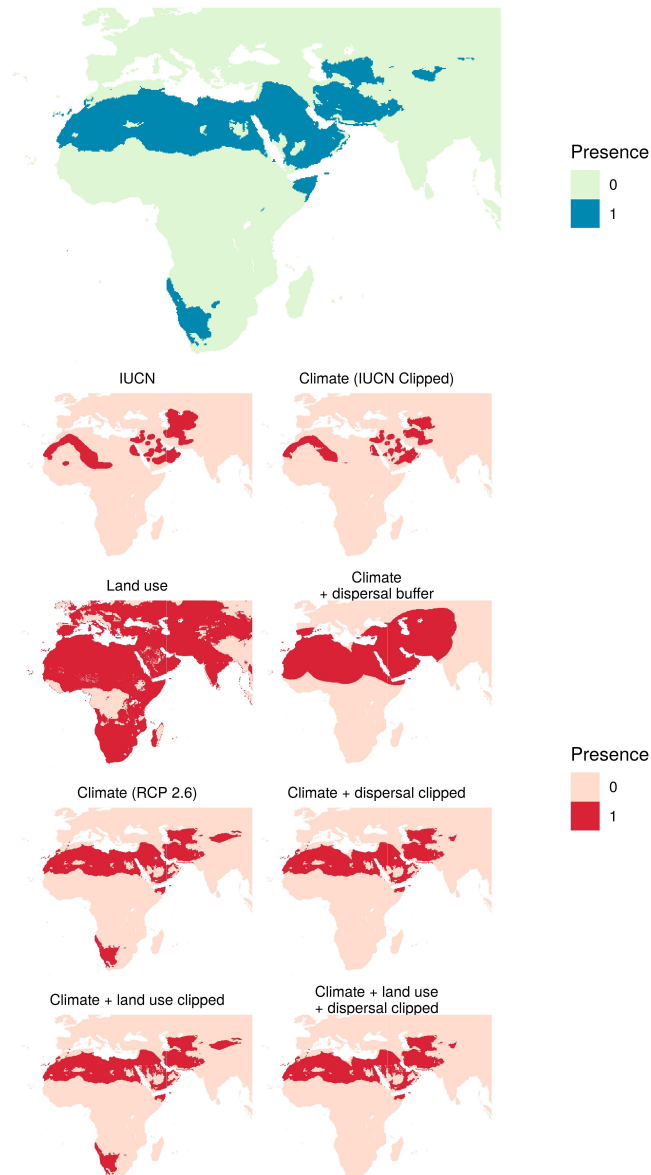

Extended Data Figure 11: **Species distribution modeling workflow for a single species.** A focal species (the sand cat, *Felis margarita*) is displayed as an illustrative example. The present day climate prediction (top left) was clipped to the same continent according to the IUCN distribution (top right). This was then clipped according to *Felis margarita*'s land use (second row, left). The known dispersal distance of the sand cat was used to buffer the climate distribution (second row, right). The potential future distribution predictions (RCP 2.6 shown as an example) are displayed in the bottom four panels, for each of the four pipelines: only climate (third row, left); climate + dispersal clip (third row, right); climate + land use clip (bottom row, left) and climate + land use + dispersal clip (bottom row, right). The four distributions clearly display the limiting effect of the dispersal filter (bottom right panels) in reducing the probability of novel species interactions (bottom left panels). The land use clip had little effect on this species as the entire distribution area was habitable for the sand cat.

## References

754

- 755 1. Carlson, C. J, Zipfel, C. M, Garnier, R, & Bansal, S. (2019) Global estimates of mammalian  
756 viral biodiversity accounting for host sharing. *Nature Ecology and Evolution* **3**, 1070–1075.
- 757 2. Carroll, D, Daszak, P, Wolfe, N. D, Gao, G. F, Morel, C. M, Morzaria, S, Pablos-Méndez, A,  
758 Tomori, O, & Mazet, J. A. (2018) The global virome project. *Science* **359**, 872–874.
- 759 3. Olival, K. J, Hosseini, P. R, Zambrana-Torrel, C, Ross, N, Bogich, T. L, & Daszak, P. (2017)  
760 Host and viral traits predict zoonotic spillover from mammals. *Nature* **546**, 646.
- 761 4. Altizer, S, Ostfeld, R. S, Johnson, P. T, Kutz, S, & Harvell, C. D. (2013) Climate change and  
762 infectious diseases: from evidence to a predictive framework. *Science* **341**, 514–519.
- 763 5. Cleaveland, S, Haydon, D, & Taylor, L. (2007) Overviews of pathogen emergence: which  
764 pathogens emerge, when and why? *Wildlife and Emerging Zoonotic Diseases: The Biology,  
765 Circumstances and Consequences of Cross-Species Transmission* pp. 85–111.
- 766 6. Parrish, C. R, Holmes, E. C, Morens, D. M, Park, E.-C, Burke, D. S, Calisher, C. H, Laughlin,  
767 C. A, Saif, L. J, & Daszak, P. (2008) Cross-species virus transmission and the emergence of  
768 new epidemic diseases. *Microbiology and Molecular Biology Reviews* **72**, 457–470.
- 769 7. Woolhouse, M. E, Haydon, D. T, & Antia, R. (2005) Emerging pathogens: the epidemiology  
770 and evolution of species jumps. *Trends in Ecology & Evolution* **20**, 238–244.
- 771 8. Hoberg, E. P & Brooks, D. R. (2015) Evolution in action: climate change, biodiversity  
772 dynamics and emerging infectious disease. *Philosophical Transactions of the Royal Society B:  
773 Biological Sciences* **370**, 20130553.
- 774 9. Burrows, M. T, Schoeman, D. S, Richardson, A. J, Molinos, J. G, Hoffmann, A, Buckley,  
775 L. B, Moore, P. J, Brown, C. J, Bruno, J. F, Duarte, C. M, et al. (2014) Geographical limits to  
776 species-range shifts are suggested by climate velocity. *Nature* **507**, 492.
- 777 10. Chen, I.-C, Hill, J. K, Ohlemüller, R, Roy, D. B, & Thomas, C. D. (2011) Rapid range shifts  
778 of species associated with high levels of climate warming. *Science* **333**, 1024–1026.
- 779 11. Carlson, C. J, Burgio, K. R, Dougherty, E. R, Phillips, A. J, Bueno, V. M, Clements, C. F,  
780 Castaldo, G, Dallas, T. A, Cizauskas, C. A, Cumming, G. S, et al. (2017) Parasite biodiver-  
781 sity faces extinction and redistribution in a changing climate. *Science Advances* **3**, e1602422.
- 782 12. Jones, K. E, Patel, N. G, Levy, M. A, Storeygard, A, Balk, D, Gittleman, J. L, & Daszak, P.  
783 (2008) Global trends in emerging infectious diseases. *Nature* **451**, 990.
- 784 13. Plowright, R. K, Parrish, C. R, McCallum, H, Hudson, P. J, Ko, A. I, Graham, A. L, & Lloyd-  
785 Smith, J. O. (2017) Pathways to zoonotic spillover. *Nature Reviews Microbiology* **15**, 502.
- 786 14. Wolfe, N. D, Dunavan, C. P, & Diamond, J. (2007) Origins of major human infectious  
787 diseases. *Nature* **447**, 279.

- 788 15. Lloyd-Smith, J. O, George, D, Pepin, K. M, Pitzer, V. E, Pulliam, J. R, Dobson, A. P, Hudson,  
789 P. J, & Grenfell, B. T. (2009) Epidemic dynamics at the human-animal interface. *Science* **326**,  
790 1362–1367.
- 791 16. Gould, S. J & Lewontin, R. C. (1979) The spandrels of San Marco and the Panglossian  
792 paradigm: a critique of the adaptationist programme. *Proceedings of the Royal Society of*  
793 *London. Series B: Biological Sciences* **205**, 581–598.
- 794 17. Alexander, K. A, Carlson, C. J, Lewis, B. L, Getz, W. M, Marathe, M. V, Eubank, S. G,  
795 Sanderson, C. E, & Blackburn, J. K. (2018) The ecology of pathogen spillover and disease  
796 emergence at the human-wildlife-environment interface. *The Connections Between Ecology*  
797 *and Infectious Disease* pp. 267–298.
- 798 18. Albery, G. F, Eskew, E. A, Ross, N, & Olival, K. J. (2020) Predicting the global mammalian  
799 viral sharing network using phylogeography. *Nature Communications* **11**, 1–9.
- 800 19. Faria, N. R, Suchard, M. A, Rambaut, A, Streicker, D. G, & Lemey, P. (2013) Simultaneously  
801 reconstructing viral cross-species transmission history and identifying the underlying con-  
802 straints. *Philosophical Transactions of the Royal Society B: Biological Sciences* **368**, 20120196.
- 803 20. Dougherty, E. R, Seidel, D. P, Carlson, C. J, Spiegel, O, & Getz, W. M. (2018) Going through  
804 the motions: incorporating movement analyses into disease research. *Ecology Letters* **21**,  
805 588–604.
- 806 21. Sun, B, Jia, L, Liang, B, Chen, Q, & Liu, D. (2018) Phylogeography, transmission, and viral  
807 proteins of Nipah virus. *Virologica Sinica* **33**, 385–393.
- 808 22. Huang, S, Bininda-Emonds, O. R, Stephens, P. R, Gittleman, J. L, & Altizer, S. (2014) Phy-  
809 logenetically related and ecologically similar carnivores harbour similar parasite assem-  
810 blages. *Journal of Animal Ecology* **83**, 671–680.
- 811 23. Davies, T. J & Pedersen, A. B. (2008) Phylogeny and geography predict pathogen commu-  
812 nity similarity in wild primates and humans. *Proceedings of the Royal Society B: Biological*  
813 *Sciences* **275**, 1695–1701.
- 814 24. Farrell, M. J & Davies, T. J. (2019) Disease mortality in domesticated animals is predicted  
815 by host evolutionary relationships. *Proceedings of the National Academy of Sciences* **116**, 7911–  
816 7915.
- 817 25. Longdon, B, Brockhurst, M. A, Russell, C. A, Welch, J. J, & Jiggins, F. M. (2014) The evolu-  
818 tion and genetics of virus host shifts. *PLoS Pathogens* **10**, e1004395.
- 819 26. Streicker, D. G, Turmelle, A. S, Vonhof, M. J, Kuzmin, I. V, McCracken, G. F, & Rupprecht,  
820 C. E. (2010) Host phylogeny constrains cross-species emergence and establishment of ra-  
821 bies virus in bats. *Science* **329**, 676–679.
- 822 27. Allen, T, Murray, K. A, Zambrana-Torrel, C, Morse, S. S, Rondinini, C, Di Marco, M, Breit,  
823 N, Olival, K. J, & Daszak, P. (2017) Global hotspots and correlates of emerging zoonotic  
824 diseases. *Nature Communications* **8**, 1124.

- 825 28. Johnson, C. K, Hitchens, P. L, Evans, T. S, Goldstein, T, Thomas, K, Clements, A, Joly, D. O,  
826 Wolfe, N. D, Daszak, P, Karesh, W. B, et al. (2015) Spillover and pandemic properties of  
827 zoonotic viruses with high host plasticity. *Scientific Reports* **5**, 14830.
- 828 29. Han, B. A, Kramer, A. M, & Drake, J. M. (2016) Global patterns of zoonotic disease in  
829 mammals. *Trends in Parasitology* **32**, 565–577.
- 830 30. Han, B. A, Schmidt, J. P, Alexander, L. W, Bowden, S. E, Hayman, D. T, & Drake, J. M.  
831 (2016) Undiscovered bat hosts of filoviruses. *PLoS Neglected Tropical Diseases* **10**, e0004815.
- 832 31. O’Neill, B. C, Tebaldi, C, Van Vuuren, D. P, Eyring, V, Friedlingstein, P, Hurtt, G, Knutti,  
833 R, Kriegler, E, Lamarque, J.-F, Lowe, J, et al. (2016) The scenario model intercomparison  
834 project (scenariomip) for cmip6. *Geoscientific Model Development* **9**, 3461–3482.
- 835 32. Schloss, C. A, Nuñez, T. A, & Lawler, J. J. (2012) Dispersal will limit ability of mammals  
836 to track climate change in the western hemisphere. *Proceedings of the National Academy of  
837 Sciences* **109**, 8606–8611.
- 838 33. Loarie, S. R, Duffy, P. B, Hamilton, H, Asner, G. P, & Field, C. B. (2009) The velocity of  
839 climate change. *Nature* **462**, 1052–1055.
- 840 34. Hickling, R, Roy, D. B, Hill, J. K, Fox, R, & Thomas, C. D. (2006) The distributions of a wide  
841 range of taxonomic groups are expanding polewards. *Global Change Biology* **12**, 450–455.
- 842 35. Mason, S. C, Palmer, G, Fox, R, Gillings, S, Hill, J. K, Thomas, C. D, & Oliver, T. H. (2015)  
843 Geographical range margins of many taxonomic groups continue to shift polewards. *Bio-  
844 logical Journal of the Linnean Society* **115**, 586–597.
- 845 36. Bebber, D. P, Ramotowski, M. A, & Gurr, S. J. (2013) Crop pests and pathogens move  
846 polewards in a warming world. *Nature Climate Change* **3**, 985.
- 847 37. Davidson, R, Simard, M, Kutz, S. J, Kapel, C. M, Hamnes, I. S, & Robertson, L. J. (2011)  
848 Arctic parasitology: why should we care? *Trends in Parasitology* **27**, 239–245.
- 849 38. Hoberg, E. P, Cook, J, Agosta, S, Boeger, W, Galbreath, K, Laaksonen, S, Kutz, S, & Brooks,  
850 D. (2017) Arctic systems in the quaternary: ecological collision, faunal mosaics and the  
851 consequences of a wobbling climate. *Journal of Helminthology* **91**, 409–421.
- 852 39. Colwell, R. K, Brehm, G, Cardelús, C. L, Gilman, A. C, & Longino, J. T. (2008) Global  
853 warming, elevational range shifts, and lowland biotic attrition in the wet tropics. *Science*  
854 **322**, 258–261.
- 855 40. Sales, L, Ribeiro, B. R, Chapman, C. A, & Loyola, R. (2020) Multiple dimensions of climate  
856 change on the distribution of amazon primates. *Perspectives in Ecology and Conservation*.
- 857 41. Trisos, C. H, Merow, C, & Pigot, A. L. (2020) The projected timing of abrupt ecological  
858 disruption from climate change. *Nature* **580**, 496–501.

- 859 42. Newbold, T. (2018) Future effects of climate and land-use change on terrestrial vertebrate  
860 community diversity under different scenarios. *Proceedings of the Royal Society B: Biological*  
861 *Sciences* **285**, 20180792.
- 862 43. Pauchard, A, Milbau, A, Albiñ, A, Alexander, J, Burgess, T, Daehler, C, Englund, G, Essl,  
863 F, Evengård, B, Greenwood, G. B, et al. (2016) Non-native and native organisms moving  
864 into high elevation and high latitude ecosystems in an era of climate change: new chal-  
865 lenges for ecology and conservation. *Biological Invasions* **18**, 345–353.
- 866 44. Atkinson, C. T & LaPointe, D. A. (2009) Introduced avian diseases, climate change, and  
867 the future of hawaiian honeycreepers. *Journal of Avian Medicine and Surgery* **23**, 53–63.
- 868 45. Pedersen, A. B & Davies, T. J. (2009) Cross-species pathogen transmission and disease  
869 emergence in primates. *EcoHealth* **6**, 496–508.
- 870 46. Peel, A. J, Sargan, D. R, Baker, K. S, Hayman, D. T, Barr, J. A, Crameri, G, Suu-Ire, R, Broder,  
871 C. C, Lembo, T, Wang, L.-F, et al. (2013) Continent-wide panmixia of an African fruit bat  
872 facilitates transmission of potentially zoonotic viruses. *Nature Communications* **4**, 2770.
- 873 47. Riesle-Sbarbaro, S. A, Amponsah-Mensah, K, De Vries, S, Nicolas, V, Lalis, A, Suu-Ire, R,  
874 Cunningham, A. A, Wood, J. L, & Sargan, D. R. (2018) The Gambian epauletted fruit bat  
875 shows increased genetic divergence in the Ethiopian highlands and in an area of rapid  
876 urbanization. *Ecology and Evolution* **8**, 12803–12820.
- 877 48. Wu, J. (2016) Detection and attribution of the effects of climate change on bat distributions  
878 over the last 50 years. *Climatic Change* **134**, 681–696.
- 879 49. Olival, K. (2012) Evolutionary and ecological correlates of population genetic structure in  
880 bats. *Evolutionary history of bats fossils, molecules and morphology* pp. 267–316.
- 881 50. Olival, K. J, Latinne, A, Islam, A, Epstein, J. H, Hersch, R, Engstrand, R. C, Gurley, E. S,  
882 Amato, G, Luby, S. P, & Daszak, P. (2019) Population genetics of fruit bat reservoir informs  
883 the dynamics, distribution and diversity of Nipah virus. *Molecular Ecology* p. in press.
- 884 51. Ancillotto, L, Santini, L, Ranc, N, Maiorano, L, & Russo, D. (2016) Extraordinary range  
885 expansion in a common bat: the potential roles of climate change and urbanisation. *The*  
886 *Science of Nature* **103**, 15.
- 887 52. Ancillotto, L, Budinski, I, Nardone, V, Di Salvo, I, Della Corte, M, Bosso, L, Conti, P, &  
888 Russo, D. (2018) What is driving range expansion in a common bat? hints from ther-  
889 moregulation and habitat selection. *Behavioural Processes* **157**, 540–546.
- 890 53. Geluso, K, Mollhagen, T. R, Tigner, J. M, & Bogan, M. A. (2005) Westward expansion of the  
891 eastern pipistrelle (*Pipistrellus subflavus*) in the United States, including new records from  
892 New Mexico, South Dakota, and Texas. *Western North American Naturalist* **65**, 12.
- 893 54. Kurta, A, Winhold, L, Whitaker, J. O, & Foster, R. (2007) Range expansion and changing  
894 abundance of the eastern pipistrelle (Chiroptera: Vespertilionidae) in the central Great  
895 Lakes region. *The American Midland Naturalist* **157**, 404–412.



- 896 55. Lundy, M, Montgomery, I, & Russ, J. (2010) Climate change-linked range expansion of  
897 Nathusius' pipistrelle bat, *Pipistrellus nathusii* (Keyserling & Blasius, 1839). *Journal of Bio-*  
898 *geography* **37**, 2232–2242.
- 899 56. McCracken, G. F, Bernard, R. F, Gamba-Rios, M, Wolfe, R, Krauel, J. J, Jones, D. N, Russell,  
900 A. L, & Brown, V. A. (2018) Rapid range expansion of the Brazilian free-tailed bat in the  
901 southeastern United States, 2008–2016. *Journal of Mammalogy* **99**, 312–320.
- 902 57. Roberts, B. J, Catterall, C. P, Eby, P, & Kanowski, J. (2012) Latitudinal range shifts in Aus-  
903 tralian flying-foxes: A re-evaluation. *Austral Ecology* **37**, 12–22.
- 904 58. Uhrin, M, Hüttmeir, U, Kipson, M, Estók, P, Sachanowicz, K, Bücs, S, Karapandža, B,  
905 Paunović, M, Presetnik, P, Bashta, A.-T, et al. (2016) Status of Savi's pipistrelle *Hypsugo*  
906 *savii* (Chiroptera) and range expansion in Central and south-eastern Europe: a review.  
907 *Mammal Review* **46**, 1–16.
- 908 59. Brook, C. E & Dobson, A. P. (2015) Bats as 'special' reservoirs for emerging zoonotic  
909 pathogens. *Trends in Microbiology* **23**, 172–180.
- 910 60. Luis, A. D, Hayman, D. T, O'Shea, T. J, Cryan, P. M, Gilbert, A. T, Pulliam, J. R, Mills, J. N,  
911 Timonin, M. E, Willis, C. K, Cunningham, A. A, et al. (2013) A comparison of bats and  
912 rodents as reservoirs of zoonotic viruses: are bats special? *Proceedings of the Royal Society*  
913 *B: Biological Sciences* **280**, 20122753.
- 914 61. Olival, K. J, Weekley, C. C, & Daszak, P. (2015) Are bats really 'special' as viral reservoirs?  
915 what we know and need to know. *Bats and Viruses* pp. 281–294.
- 916 62. Wang, L.-F, Walker, P. J, & Poon, L. L. (2011) Mass extinctions, biodiversity and mitochon-  
917 drial function: are bats 'special' as reservoirs for emerging viruses? *Current Opinion in*  
918 *Virology* **1**, 649–657.
- 919 63. Mollentze, N & Streicker, D. G. (2020) Viral zoonotic risk is homogenous among taxonomic  
920 orders of mammalian and avian reservoir hosts. *Proceedings of the National Academy of*  
921 *Sciences* **117**, 9423–9430.
- 922 64. Geoghegan, J. L, Senior, A. M, Di Giallonardo, F, & Holmes, E. C. (2016) Virological factors  
923 that increase the transmissibility of emerging human viruses. *Proceedings of the National*  
924 *Academy of Sciences* **113**, 4170–4175.
- 925 65. Walker, J. W, Han, B. A, Ott, I. M, & Drake, J. M. (2018) Transmissibility of emerging viral  
926 zoonoses. *PloS One* **13**, e0206926.
- 927 66. Sharp, P. M & Hahn, B. H. (2011) Origins of hiv and the aids pandemic. *Cold Spring Harbor*  
928 *perspectives in medicine* **1**, a006841.
- 929 67. Cui, J, Li, F, & Shi, Z.-L. (2019) Origin and evolution of pathogenic coronaviruses. *Nature*  
930 *Reviews Microbiology* **17**, 181–192.

- 931 68. Pigott, D. M, Milllear, A. I, Earl, L, Morozoff, C, Han, B. A, Shearer, F. M, Weiss, D. J, Brady,  
932 O. J, Kraemer, M. U, Moyes, C. L, et al. (2016) Updates to the zoonotic niche map of Ebola  
933 virus disease in Africa. *Elife* **5**, e16412.
- 934 69. Bermejo, M, Rodríguez-Teijeiro, J. D, Illera, G, Barroso, A, Vilà, C, & Walsh, P. D. (2006)  
935 Ebola outbreak killed 5000 gorillas. *Science* **314**, 1564–1564.
- 936 70. Hayman, D. T. (2019) African primates: Likely victims, not reservoirs, of ebolaviruses. *The*  
937 *Journal of Infectious Diseases*.
- 938 71. Goldstein, T, Anthony, S. J, Gbakima, A, Bird, B. H, Bangura, J, Tremeau-Bravard, A, Bela-  
939 ganahalli, M. N, Wells, H. L, Dhanota, J. K, Liang, E, et al. (2018) The discovery of Bombali  
940 virus adds further support for bats as hosts of ebolaviruses. *Nature Microbiology* **3**, 1084.
- 941 72. Williams, J. N. (2013) Humans and biodiversity: population and demographic trends in  
942 the hotspots. *Population and Environment* **34**, 510–523.
- 943 73. Cheng, Y, Tjaden, N. B, Jaeschke, A, Lühken, R, Ziegler, U, Thomas, S. M, & Beierkuhn-  
944 lein, C. (2018) Evaluating the risk for Usutu virus circulation in Europe: comparison of  
945 environmental niche models and epidemiological models. *International Journal of Health*  
946 *Geographics* **17**, 35.
- 947 74. Cavicchioli, R, Ripple, W. J, Timmis, K. N, Azam, F, Bakken, L. R, Baylis, M, Behrenfeld,  
948 M. J, Boetius, A, Boyd, P. W, Classen, A. T, et al. (2019) Scientists' warning to humanity:  
949 microorganisms and climate change. *Nature Reviews Microbiology* **17**, 569–586.
- 950 75. Caminade, C, McIntyre, K. M, & Jones, A. E. (2019) Impact of recent and future climate  
951 change on vector-borne diseases. *Annals of the New York Academy of Sciences* **1436**, 157.
- 952 76. Urban, M. C. (2015) Accelerating extinction risk from climate change. *Science* **348**, 571–573.
- 953 77. Beyer, R & Manica, A. (2020) Range sizes of the world's mammals, birds and amphibians  
954 from 10,000 bc to 2100 ad. *bioRxiv* p. 779801.
- 955 78. Abel, G. J, Brottrager, M, Cuaresma, J. C, & Muttarak, R. (2019) Climate, conflict and forced  
956 migration. *Global Environmental Change* **54**, 239–249.
- 957 79. Xu, C, Kohler, T. A, Lenton, T. M, Svenning, J.-C, & Scheffer, M. (2020) Future of the human  
958 climate niche. *Proceedings of the National Academy of Sciences*.
- 959 80. Roberts, K. E, Hadfield, J. D, Sharma, M. D, & Longdon, B. (2018) Changes in temperature  
960 alter the potential outcomes of virus host shifts. *PLoS Pathogens* **14**, e1007185.
- 961 81. Faust, C. L, Dobson, A. P, Gottdenker, N, Bloomfield, L. S, McCallum, H. I, Gillespie,  
962 T. R, Diuk-Wasser, M, & Plowright, R. K. (2017) Null expectations for disease dynam-  
963 ics in shrinking habitat: dilution or amplification? *Philosophical Transactions of the Royal*  
964 *Society B: Biological Sciences* **372**, 20160173.

- 965 82. Cunningham, A. (2018) *Infectious disease threats to amphibian conservation*. (Glasgow Natural  
966 History Society), Vol. 27.
- 967 83. VanWormer, E, Mazet, J, Hall, A, Gill, V, Boveng, P, London, J, Gelatt, T, Fadely, B, Lander,  
968 M, Sterling, J, et al. (2019) Viral emergence in marine mammals in the North Pacific may  
969 be linked to Arctic sea ice reduction. *Scientific Reports* **9**, 1–11.
- 970 84. Becker, D, Albery, G. F, Sjodin, A. R, Poisot, T, Dallas, T, Eskew, E. A, Farrell, M. J, Guth, S,  
971 Han, B. A, Simmons, N. B, et al. (2020) Predicting wildlife hosts of betacoronaviruses for  
972 sars-cov-2 sampling prioritization. *bioRxiv*.
- 973 85. Liu, P, Jiang, J.-Z, Wan, X.-F, Hua, Y, Li, L, Zhou, J, Wang, X, Hou, F, Chen, J, Zou, J,  
974 et al. (2020) Are pangolins the intermediate host of the 2019 novel coronavirus (sars-cov-  
975 2)? *PLoS Pathogens* **16**, e1008421.
- 976 86. Zhang, T, Wu, Q, & Zhang, Z. (2020) Probable pangolin origin of sars-cov-2 associated  
977 with the covid-19 outbreak. *Current Biology*.
- 978 87. Olival, K. J, Hosseini, P. R, Zambrana-Torrel, C, Ross, N, Bogich, T. L, & Daszak, P. (2017)  
979 Host and viral traits predict zoonotic spillover from mammals. *Nature* **546**, 646–650.
- 980 88. Washburne, A. D, Crowley, D. E, Becker, D. J, Olival, K. J, Taylor, M, Munster, V. J,  
981 & Plowright, R. K. (2018) Taxonomic patterns in the zoonotic potential of mammalian  
982 viruses. *PeerJ* **6**, e5979.
- 983 89. Grubbs, F. E et al. (1950) Sample criteria for testing outlying observations. *The Annals of*  
984 *Mathematical Statistics* **21**, 27–58.
- 985 90. Fick, S. E & Hijmans, R. J. (2017) WorldClim 2: new 1-km spatial resolution climate surfaces  
986 for global land areas. *International Journal of Climatology* **37**, 4302–4315.
- 987 91. Hurtt, G, Chini, L, Sahajpal, R, Frohking, S, Boudirsky, B, Calvin, K, Doelman, J, Fisk, J,  
988 Fujimori, S, Goldewijk, K, et al. (2018) *LUH2: Harmonization of global land-use scenarios for*  
989 *the period 850-2100*.
- 990 92. Zelinka, M. D, Myers, T. A, McCoy, D. T, Po-Chedley, S, Caldwell, P. M, Ceppi, P, Klein,  
991 S. A, & Taylor, K. E. (2020) Causes of higher climate sensitivity in cmip6 models. *Geophys-*  
992 *ical Research Letters* **47**, e2019GL085782.
- 993 93. Navarro-Racines, C, Tarapues, J, Thornton, P, Jarvis, A, & Ramirez-Villegas, J. (2020) High-  
994 resolution and bias-corrected cmip5 projections for climate change impact assessments.  
995 *Scientific data* **7**, 1–14.
- 996 94. Hurtt, G. C, Chini, L. P, Frohking, S, Betts, R. A, Feddema, J, Fischer, G, Fisk, J. P, Hibbard,  
997 K, Houghton, R. A, Janetos, A, Jones, C. D, Kindermann, G, Kinoshita, T, Klein Goldewijk,  
998 K, Riahi, K, Shevliakova, E, Smith, S, Stehfest, E, Thomson, A, Thornton, P, van Vuuren,  
999 D. P, & Wang, Y. P. (2011) Harmonization of land-use scenarios for the period 1500–2100:  
1000 600 years of global gridded annual land-use transitions, wood harvest, and resulting sec-  
1001 ondary lands. *Climatic Change* **109**, 117–161.

- 1002 95. Powers, R. P & Jetz, W. (2019) Global habitat loss and extinction risk of terrestrial verte-  
1003 brates under future land-use-change scenarios. *Nature Climate Change* **9**, 323.
- 1004 96. Gao, J. (2017) Downscaling global spatial population projections from 1/8-degree to 1-  
1005 km grid cells, (NCAR technical note NCAR/TN-537+ STR. Boulder, Colorado: National  
1006 Center for Atmospheric Research), Technical report.
- 1007 97. Jones, B & O'Neill, B. C. (2016) Spatially explicit global population scenarios consistent  
1008 with the shared socioeconomic pathways. *Environmental Research Letters* **11**, 084003.
- 1009 98. IUCN Red List. (2019) The iucn red list of threatened species. *International Union for Con-*  
1010 *servation of Nature and Natural Resources. Online at: <http://www.iucnredlist.org/>.*
- 1011 99. Renner, I. W, Elith, J, Baddeley, A, Fithian, W, Hastie, T, Phillips, S. J, Popovic, G, & Warton,  
1012 D. I. (2015) Point process models for presence-only analysis. *Methods in Ecology and Evolu-*  
1013 *tion* **6**, 366–379.
- 1014 100. Friedman, J, Hastie, T, & Tibshirani, R. (2010) Regularization paths for generalized linear  
1015 models via coordinate descent. *Journal of Statistical Software* **33**, 1.
- 1016 101. Phillips, S. J, Anderson, R. P, & Schapire, R. E. (2006) Maximum entropy modeling of  
1017 species geographic distributions. *Ecological Modelling* **190**, 231–259.
- 1018 102. Hastie, T, Tibshirani, R, & Friedman, J. H. (2009) *The elements of statistical learning: data*  
1019 *mining, inference, and prediction*. (Springer-Verlag, New York), 2nd edition.
- 1020 103. Drake, J. M. (2015) Range bagging: a new method for ecological niche modelling from  
1021 presence-only data. *Journal of The Royal Society Interface* **12**, 20150086–9.
- 1022 104. Drake, J. M & Richards, R. L. (2018) Estimating environmental suitability. *Ecosphere* **9**,  
1023 e02373.
- 1024 105. Jetz, W, Wilcove, D. S, & Dobson, A. P. (2007) Projected impacts of climate and land-use  
1025 change on the global diversity of birds. *PLoS Biology* **5**, e157.
- 1026 106. Pecl, G. T, Araújo, M. B, Bell, J. D, Blanchard, J, Bonebrake, T. C, Chen, I.-C, Clark, T. D,  
1027 Colwell, R. K, Danielsen, F, Evengård, B, et al. (2017) Biodiversity redistribution under  
1028 climate change: Impacts on ecosystems and human well-being. *Science* **355**, eaai9214.
- 1029 107. van Vuuren, D. P, Riahi, K, Calvin, K, Dellink, R, Emmerling, J, Fujimori, S, Kc, S, Kriegler,  
1030 E, & O'Neill, B. (2017) The Shared Socio-economic Pathways: Trajectories for human de-  
1031 velopment and global environmental change. *Global Environmental Change* **42**, 148–152.
- 1032 108. Riahi, K, van Vuuren, D. P, Kriegler, E, Edmonds, J, O'Neill, B. C, Fujimori, S, Bauer, N,  
1033 Calvin, K, Dellink, R, Fricko, O, Lutz, W, Popp, A, Cuaresma, J. C, Kc, S, Leimbach, M,  
1034 Jiang, L, Kram, T, Rao, S, Emmerling, J, Ebi, K, Hasegawa, T, Havlik, P, Humpenöder,  
1035 F, Da Silva, L. A, Smith, S, Stehfest, E, Bosetti, V, Eom, J, Gernaat, D, Masui, T, Rogelj,  
1036 J, Strefler, J, Drouet, L, Krey, V, Luderer, G, Harmsen, M, Takahashi, K, Baumstark, L,

- 1037 Doelman, J. C, Kainuma, M, Klimont, Z, Marangoni, G, Lotze-Campen, H, Obersteiner,  
1038 M, Tabeau, A, & Tavoni, M. (2017) The Shared Socioeconomic Pathways and their energy,  
1039 land use, and greenhouse gas emissions implications: An overview. *Global Environmental*  
1040 *Change* **42**, 153–168.
- 1041 109. Popp, A, Calvin, K, Fujimori, S, Havlik, P, Humpenöder, F, Stehfest, E, Bodirsky, B. L,  
1042 Dietrich, J. P, Doelmann, J. C, Gusti, M, Hasegawa, T, Kyle, P, Obersteiner, M, Tabeau,  
1043 A, Takahashi, K, Valin, H, Waldhoff, S, Weindl, I, Wise, M, Kriegler, E, Lotze-Campen, H,  
1044 Fricko, O, Riahi, K, & Vuuren, D. P. v. (2017) Land-use futures in the shared socio-economic  
1045 pathways. *Global Environmental Change* **42**, 331–345.
- 1046 110. Samir, K & Lutz, W. (2017) The human core of the shared socioeconomic pathways: Popu-  
1047 lation scenarios by age, sex and level of education for all countries to 2100. *Global Environ-*  
1048 *mental Change* **42**, 181–192.
- 1049 111. Wilman, H, Belmaker, J, Simpson, J, de la Rosa, C, Rivadeneira, M. M, & Jetz, W. (2014)  
1050 Eltontraits 1.0: Species-level foraging attributes of the world’s birds and mammals: Eco-  
1051 logical archives e095-178. *Ecology* **95**, 2027–2027.
- 1052 112. Pacifici, M, Santini, L, Di Marco, M, Baisero, D, Francucci, L, Marasini, G. G, Visconti, P, &  
1053 Rondinini, C. (2013) Generation length for mammals. *Nature Conservation* **5**, 89.
- 1054 113. Bateman, B. L, Murphy, H. T, Reside, A. E, Mokany, K, & VanDerWal, J. (2013) Appro-  
1055 priateness of full-, partial-and no-dispersal scenarios in climate change impact modelling.  
1056 *Diversity and Distributions* **19**, 1224–1234.
- 1057 114. Fritz, S. A, Bininda-Emonds, O. R, & Purvis, A. (2009) Geographical variation in predictors  
1058 of mammalian extinction risk: big is bad, but only in the tropics. *Ecology Letters* **12**, 538–549.
- 1059 115. Jones, K. E, Bielby, J, Cardillo, M, Fritz, S. A, O’Dell, J, Orme, C. D. L, Safi, K, Sechrest, W,  
1060 Boakes, E. H, Carbone, C, et al. (2009) PanTHERIA: a species-level database of life history,  
1061 ecology, and geography of extant and recently extinct mammals: Ecological Archives E090-  
1062 184. *Ecology* **90**, 2648–2648.
- 1063 116. Araújo, M. B, Rozenfeld, A, Rahbek, C, & Marquet, P. A. (2011) Using species co-occurrence  
1064 networks to assess the impacts of climate change. *Ecography* **34**, 897–908.
- 1065 117. Olival, K. J, Islam, A, Yu, M, Anthony, S. J, Epstein, J. H, Khan, S. A, Khan, S. U, Crameri,  
1066 G, Wang, L.-F, Lipkin, W. I, et al. (2013) Ebola virus antibodies in fruit bats, Bangladesh.  
1067 *Emerging Infectious Diseases* **19**, 270.
- 1068 118. Yang, X.-L, Zhang, Y.-Z, Jiang, R.-D, Guo, H, Zhang, W, Li, B, Wang, N, Wang, L, Waruhiu,  
1069 C, Zhou, J.-H, et al. (2017) Genetically diverse filoviruses in *Rousettus* and *Eonycteris* spp.  
1070 bats, China, 2009 and 2015. *Emerging Infectious Diseases* **23**, 482.
- 1071 119. Archis, J. N, Akcali, C, Stuart, B. L, Kikuchi, D, & Chunco, A. J. (2018) Is the future already  
1072 here? the impact of climate change on the distribution of the eastern coral snake (*micrurus*  
1073 *fulvius*). *PeerJ* **6**, e4647.

- 1074 120. Muñoz Sabater, J. (2019) ERA5-Land monthly averaged data from 1981 to present. *Coper-*  
1075 *nicus Climate Change Service (C3S) Climate Data Store (CDS)*. Accessed on January 1, 2021. p.  
1076 DOI:10.24381/cds.68d2bb3.
